# Supplementary material for: Amyloid-Related Imaging Abnormalities (ARIA) in Clinical Trials of Gantenerumab in Early Alzheimer Disease
Source: PubMed Central journal article supplement — JAMA Neurol. 2024 Nov 18;82(1):19–29. doi: 10.1001/jamaneurol.2024.3937 (PMC11574721; doi:10.1001/jamaneurol.2024.3937), 2024-11-18
Supplement: jamaneurol-e243937-s001.pdf [file jamaneurol-e243937-s001.pdf]

## Supplemental Online Content

1  
2  
3  
4  
5  
6  
7  
8  
9  
10  
11  
12  
13  
14  
15  
16  
17  
18  
19  
20  
21  
22  
23  
24  
25  
26  
27  
28  
29  
30  
31  
32  
33  
34  
35  
36  
37  
38  
39  
40  
41  
42

Salloway S, Wojtowicz J, Voylev N, et al. Amyloid-related imaging abnormalities in clinical trials of gantenerumab in early Alzheimer disease. *JAMA Neurol*. Published online November 18, 2024. doi:10.1001/jamaneurol.2024.3937

**eMethods.** Analysis for Risk Factors of Amyloid-Related Imaging Abnormalities – Edema (ARIA-E) in GRADUATE I and II

**eTable 1.** GRADUATE I and II: Baseline Characteristics of Pooled Safety-evaluable MRI Population

**eTable 2.** PostGraduate: Demographic and Baseline Characteristics

**eTable 3.** Analysis for Risk Factors of ARIA-E in GRADUATE I and II, Demographic and Baseline Characteristics of Participants

**eTable 4.** Risk Factors for ARIA-E With Concurrent ARIA-H: Multivariate Modeling With Stepwise Logistic Regression for Baseline Variables With Univariate  $P < .05$

**eTable 5.** GRADUATE I and II: Nature and Severity of CNS Symptoms in Serious Symptomatic ARIA-E Cases

**eTable 6.** GRADUATE I and II: Summary of Changes in Clinical Symptomatology from First to Second ARIA-E Episode, Gantenerumab Arm

**eTable 7.** GRADUATE I and II: Summary of Radiological Severity of ARIA-E MRI Findings by Concurrence with New ARIA-H MRI Findings

**eFigure 1.** GRADUATE I and II: ARIA-Related Dosing Intervention Rules

**eFigure 2.** PostGraduate: Study Design

**eFigure 3.** PostGraduate: Participant Flow

**eFigure 4.** Kaplan-Meier Plot of Time-to-Onset of First ARIA-E Event in the Double-Blind Period of GRADUATE Trials

**eFigure 5.** Kaplan-Meier Plot of Time-to-Onset of First ARIA-E Event from First Gantenerumab Dose in Double-Blind Period of GRADUATE Including Open-Label Period and PostGraduate Data

**eFigure 6.** Kaplan-Meier Plot of Time-to-Onset of First ARIA-E Event in the Double-Blind Period of GRADUATE Trials by APOE  $\epsilon 4$  Status

**eFigure 7.** Kaplan-Meier Plot of Time-to-Onset of First ARIA-E Event from First Gantenerumab Dose in Double-Blind Period of GRADUATE Including Open-Label Period and PostGraduate Data by APOE  $\epsilon 4$  Status

**Supplementary Case Narratives.** GRADUATE I and II: Serious Symptomatic ARIA-E Cases

This supplemental material has been provided by the authors to give readers additional information about their work.

47 **Supplementary Methods: Analysis for Risk Factors of Amyloid-Related Imaging**

48 **Abnormalities – Edema (ARIA-E) in GRADUATE I and II**

49 **List of All Baseline Variables Evaluated**

- 50 • Demographic: age, sex, race, ethnicity, region, Alzheimer’s disease (AD)  
51 stage (prodromal versus mild)
- 52 • Genetic: apolipoprotein E (APOE) ε4 allele count (0, 1, 2)
- 53 • Study protocol number
- 54 • Clinical scales: Alzheimer’s Disease Assessment Scale – Cognitive Subscale  
55 13 (ADAS-Cog13), Mini-Mental State Examination (MMSE), Clinical Dementia  
56 Rating – Sum of Boxes (CDR-SB), Clinical Dementia Rating – Global Score  
57 (CDR-GS)
- 58 • Medical history and concomitant medications at baseline: the use of AD  
59 medications, cardiovascular risk factors (dyslipidemia, hypertension, diabetes;  
60 the presence of any cardiovascular risk factor[s]), antiplatelet agents (the use  
61 of antiplatelet therapy that is not acute acetylsalicylic acid or dosed as  
62 needed)
- 63 • Vital signs: weight, body mass index (BMI), systolic and diastolic blood  
64 pressure, pulse pressure
- 65 • Radiological: microhemorrhages and/or superficial siderosis (SS) (presence  
66 or absence, baseline total, baseline microhemorrhages, baseline SS),  
67 Fazekas score, lacunar infarcts (presence or absence)
- 68 • Volumetric magnetic resonance imaging (MRI): gray matter, whole brain,  
69 hippocampus
- 70 • Cerebrospinal (CSF) biomarker concentrations (log2 transformed [LT]):

- 71           ○ AD core biomarkers: amyloid-beta ( $A\beta$ )<sub>42</sub>, total tau (tTau),  
72           phosphorylated tau (pTau)<sub>181</sub>,  $A\beta$ <sub>40</sub>
- 73           ○ NeuroToolKit: alpha-synuclein ( $\alpha$ -syn), soluble triggering receptor  
74           expressed on myeloid cells 2 (sTREM2), neurofilament light chain  
75           (NfL), neurogranin, chitinase 3-like protein 1 (YKL 40), glial fibrillary  
76           acidic protein (GFAP), S100 calcium-binding protein B (S100B)
- 77           ● Amyloid positron emission tomography (PET): composite region with whole  
78           cerebellum reference (centiloid [CL])
- 79           ● Plasma biomarker concentrations (LT):  $A\beta$ <sub>42</sub>,  $A\beta$ <sub>40</sub>, pTau<sub>181</sub>, pTau<sub>217</sub>, GFAP,  
80           neuronal pentraxin-2 (NPTX2), growth differentiation factor-15 (GDF-15), NfL
- 81           ● Laboratory values (log<sub>2</sub> transformed): vitamin B12, methylmalonic acid  
82           (MMA), folic acid, glycosylated hemoglobin A1c (HbA1c), homocysteine

83

#### 84 **Further Details on Analysis**

85 Each variable was tested in a univariate logistic regression model. Results include  
86 *P* values resulting from Bonferroni multiple testing corrections. Variables with a  
87 *P* value of < .05 in univariate modeling (without adjustment for multiple testing) were  
88 included in a backward stepwise multivariate logistic regression analysis to identify a  
89 reduced set of variables with an optimal model fit determined by Akaike information  
90 criterion.<sup>2</sup> To avoid model overfitting and a lack of convergence, and to maximize the  
91 possibility of identifying pertinent risk factors, this was repeated on three different  
92 combinations of the baseline variable groups (clinical + MRI + plasma; clinical + MRI  
93 + plasma + CSF; clinical + MRI + plasma + PET). In addition, univariate proportional  
94 hazards modeling was performed using the same variables. For continuous variables,

95 the odds ratio/hazard ratio is associated with a 1-point increase in the variable. For  
96 log-transformed variables, the odds ratio/hazard ratio is associated with a fold change.  
97

98 **eTable 1. GRADUATE I and II: Baseline Characteristics of Pooled Safety-**  
 99 **evaluable MRI Population**

|                                     | <b>Placebo<br/>(n = 946)</b> | <b>Gantenerumab<br/>(n = 993)</b> | <b>Total<br/>(N = 1939)</b> |
|-------------------------------------|------------------------------|-----------------------------------|-----------------------------|
| <b>Age, years</b>                   |                              |                                   |                             |
| N                                   | 946                          | 993                               | 1939                        |
| Mean (SD)                           | 72.0 (7.6)                   | 71.3 (7.8)                        | 71.7 (7.7)                  |
| Median (range)                      | 72.5 (51-89)                 | 72.0 (50-90)                      | 72.0 (50-90)                |
| <b>Age group, year, n (%)</b>       |                              |                                   |                             |
| N                                   | 946                          | 993                               | 1939                        |
| < 65                                | 168 (17.8)                   | 185 (18.6)                        | 353 (18.2)                  |
| ≥ 65                                | 778 (82.2)                   | 808 (81.4)                        | 1586 (81.8)                 |
| <b>Sex, n (%)</b>                   |                              |                                   |                             |
| N                                   | 946                          | 993                               | 1939                        |
| Male                                | 416 (44.0)                   | 418 (42.1)                        | 834 (43.0)                  |
| Female                              | 530 (56.0)                   | 575 (57.9)                        | 1105 (57.0)                 |
| <b>Ethnicity, n (%)<sup>a</sup></b> |                              |                                   |                             |
| n                                   | 946                          | 993                               | 1939                        |
| Hispanic or Latino                  | 171 (18.1)                   | 161 (16.2)                        | 332 (17.1)                  |
| Not Hispanic or Latino              | 770 (81.4)                   | 824 (83.0)                        | 1594 (82.2)                 |
| Not stated                          | 2 (0.2)                      | 5 (0.5)                           | 7 (0.4)                     |
| Unknown                             | 3(0.3)                       | 3 (0.3)                           | 6 (0.3)                     |
| <b>Race, n (%)<sup>a</sup></b>      |                              |                                   |                             |
| n                                   | 946                          | 993                               | 1939                        |
| American Indian or Alaska Native    | 31 (3.3)                     | 30 (3.0)                          | 61 (3.1)                    |
| Asian                               | 128 (13.5)                   | 105 (10.6)                        | 233 (12.0)                  |
| Black or African American           | 9 (1.0)                      | 6 (0.6)                           | 15 (0.8)                    |

|                                          |                    |                   |                    |
|------------------------------------------|--------------------|-------------------|--------------------|
| White                                    | 768 (81.2)         | 838 (84.4)        | 1606 (82.8)        |
| Unknown <sup>b</sup>                     | 10 (1.1)           | 14 (1.4)          | 24 (1.2)           |
| <b>Weight at baseline, kg</b>            |                    |                   |                    |
| n                                        | 946                | 993               | 1939               |
| Mean (SD)                                | 68.28 (13.80)      | 69.42 (14.67)     | 68.86 (14.26)      |
| Median (range)                           | 67.10 (37.5-119.1) | 68.0 (36.3-133.8) | 67.80 (36.3-133.8) |
| <b>BMI at baseline, kg/m<sup>2</sup></b> |                    |                   |                    |
| n                                        | 936                | 986               | 1922               |
| Mean (SD)                                | 25.21 (4.51)       | 25.51 (4.26)      | 25.36 (4.38)       |
| Median (range)                           | 24.64 (15.6-78.7)  | 25.12 (15.6-42.3) | 24.96 (15.6-78.7)  |
| <b>Stratification region, no. (%)</b>    |                    |                   |                    |
| n                                        | 946                | 993               | 1939               |
| Western Europe and Australia             | 375 (39.6)         | 399 (40.2)        | 774 (39.9)         |
| North America                            | 236 (24.9)         | 260 (26.2)        | 496 (25.6)         |
| Others                                   | 335 (35.4)         | 334 (33.6)        | 669 (34.5)         |
| <b>APOE carrier status, no. (%)</b>      |                    |                   |                    |
| n                                        | 946                | 993               | 1939               |
| Carrier                                  | 636 (67.2)         | 658 (66.3)        | 1294 (66.7)        |
| Non-carrier                              | 310 (32.8)         | 335 (33.7)        | 645 (33.3)         |
| <b>APOE allele, n (%)</b>                |                    |                   |                    |
| n                                        | 946                | 993               | 1939               |
| 0 APOE ε4 (non-carrier)                  | 310 (32.8)         | 335 (33.7)        | 645 (33.3)         |
| 1 APOE ε4 (heterozygous carrier)         | 486 (51.4)         | 478 (48.1)        | 964 (49.7)         |
| 2 APOE ε4 (homozygous carrier)           | 150 (15.9)         | 180 (18.1)        | 330 (17.0)         |

100  
101  
102

|                                        | <b>Placebo<br/>(n = 946)</b> | <b>Gantenerumab<br/>(n = 993)</b> | <b>Total<br/>(N = 1939)</b> |
|----------------------------------------|------------------------------|-----------------------------------|-----------------------------|
| <b>Number of years of education</b>    |                              |                                   |                             |
| n                                      | 946                          | 993                               | 1939                        |
| Mean (SD)                              | 13.4 (4.1)                   | 13.3 (4.0)                        | 13.4 (4.0)                  |
| Median (range)                         | 13.0 (1-27)                  | 13.0 (3-26)                       | 13.0 (1-27)                 |
| <b>AD diagnosis at baseline, n (%)</b> |                              |                                   |                             |
| n                                      | 946                          | 993                               | 1939                        |
| Mild                                   | 426 (45.0)                   | 451 (45.4)                        | 877 (45.2)                  |
| Prodromal                              | 520 (55.0)                   | 542 (54.6)                        | 1062 (54.8)                 |
| <b>CDR-SB</b>                          |                              |                                   |                             |
| n                                      | 946                          | 992                               | 1938                        |
| Mean (SD)                              | 3.61 (1.55)                  | 3.68 (1.64)                       | 3.64 (1.60)                 |
| Median (range)                         | 3.50 (0.5-11.0)              | 3.5 (0.5-10.0)                    | 3.5 (0.5-11.0)              |
| <b>CDR-GS, n (%)</b>                   |                              |                                   |                             |
| n                                      | 946                          | 992                               | 1938                        |
| 0.5                                    | 710 (75.1)                   | 688 (69.4)                        | 1398 (72.1)                 |
| 1                                      | 232 (24.5)                   | 295 (29.7)                        | 527 (27.2)                  |
| 2                                      | 4 (0.4)                      | 9 (0.9)                           | 13 (0.7)                    |
| <b>MMSE total score</b>                |                              |                                   |                             |
| n                                      | 946                          | 992                               | 1938                        |
| Mean (SD)                              | 23.7 (3.1)                   | 23.6 (3.2)                        | 23.6 (3.1)                  |
| Median (range)                         | 24.0 (13-30)                 | 24.0 (10-30)                      | 24.0 (10-30)                |
| <b>ADAS-Cog13 total score</b>          |                              |                                   |                             |
| n                                      | 939                          | 984                               | 1923                        |
| Mean (SD)                              | 28.1 (6.9)                   | 28.1 (7.0)                        | 28.1 (6.9)                  |
| Median (range)                         | 28.0 (9-62)                  | 28.0 (6-58)                       | 28.0 (6-62)                 |

|                               |              |              |              |
|-------------------------------|--------------|--------------|--------------|
| <b>ADAS-Cog11 total score</b> |              |              |              |
| n                             | 940          | 985          | 1925         |
| Mean (SD)                     | 17.1 (5.4)   | 17.2 (5.5)   | 17.1 (5.4)   |
| Median (range)                | 17.0 (4–47)  | 17.0 (4–43)  | 17.0 (4–47)  |
| <b>ADCS-ADL total score</b>   |              |              |              |
| n                             | 938          | 989          | 1927         |
| Mean (SD)                     | 68.6 (6.9)   | 68.1 (7.2)   | 68.4 (7.1)   |
| Median (range)                | 70.0 (36-78) | 70.0 (31-78) | 70.0 (31-78) |
| <b>ADCS-ADL iADL score</b>    |              |              |              |
| n                             | 938          | 989          | 1927         |
| Mean (SD)                     | 49.9 (6.6)   | 49.4 (6.9)   | 49.6 (6.8)   |
| Median (range)                | 52 (21-59)   | 51.0 (14-59) | 51.0 (14-59) |
| <b>ADCS-ADL bADL score</b>    |              |              |              |
| n                             | 938          | 989          | 1927         |
| Mean (SD)                     | 18.8 (0.7)   | 18.7 (0.8)   | 18.7 (0.7)   |
| Median (range)                | 19.0 (12-19) | 19.0 (12-19) | 19.0 (12-19) |
| <b>FAQ total score</b>        |              |              |              |
| n                             | 939          | 990          | 1929         |
| Mean (SD)                     | 7.3 (5.5)    | 7.8 (5.8)    | 7.6 (5.7)    |
| Median (range)                | 6.0 (0-28)   | 7.0 (0-28)   | 7.0 (0-28)   |



|                                                                                 | <b>Placebo<br/>(n = 946)</b> | <b>Gantenerumab<br/>(n = 993)</b> | <b>Total<br/>(N = 1939)</b> |
|---------------------------------------------------------------------------------|------------------------------|-----------------------------------|-----------------------------|
| <b>FCSRT free recall</b>                                                        |                              |                                   |                             |
| n                                                                               | 943                          | 991                               | 1934                        |
| Mean (SD)                                                                       | 8.6 (5.5)                    | 9.0 (5.6)                         | 8.8 (5.5)                   |
| Median (range)                                                                  | 8.0 (0–28)                   | 8.0 (0–27)                        | 8.0 (0–28)                  |
| <b>FCSRT cueing index</b>                                                       |                              |                                   |                             |
| n                                                                               | 943                          | 991                               | 1934                        |
| Mean (SD)                                                                       | 0.426 (0.147)                | 0.435 (0.144)                     | 0.431 (0.145)               |
| Median (range)                                                                  | 0.442 (0-0.80)               | 0.444 (0-0.69)                    | 0.442 (0-0.80)              |
| <b>AD medications present at baseline, n (%)</b>                                |                              |                                   |                             |
| n                                                                               | 946                          | 993                               | 1939                        |
| No                                                                              | 347 (36.7)                   | 352 (35.4)                        | 699 (36.0)                  |
| Yes                                                                             | 599 (63.3)                   | 641 (64.6)                        | 1240 (64.0)                 |
| <b>Microhemorrhages and/or superficial siderosis present at baseline, n (%)</b> |                              |                                   |                             |
| n                                                                               | 946                          | 993                               | 1939                        |
| Absent                                                                          | 835 (88.3)                   | 896 (90.2)                        | 1731 (89.3)                 |
| Present                                                                         | 111 (11.7)                   | 97 (9.8)                          | 208 (10.7)                  |
| <b>Baseline finding of microhemorrhages and/or superficial siderosis</b>        |                              |                                   |                             |
| <b>Baseline microhemorrhages and/or superficial siderosis, n (%)</b>            |                              |                                   |                             |
| n                                                                               | 945                          | 993                               | NA                          |
| 0                                                                               | 834 (88.3)                   | 896 (90.2)                        | NA                          |
| 1–5                                                                             | 111 (11.7)                   | 96 (9.7)                          | NA                          |
| > 5                                                                             | 0                            | 1 (0.1)                           | NA                          |
| n, > 0 (%)                                                                      | 111 (11.7)                   | 97 (9.8)                          | NA                          |

|                                              |            |            |    |
|----------------------------------------------|------------|------------|----|
| Mean (SD)                                    | 1.4 (0.9)  | 1.8 (1.2)  | NA |
| Median (range)                               | 1.0 (1-5)  | 1.0 (1-6)  | NA |
| Q1-Q3                                        | 1.0-1.0    | 1.0-2.0    | NA |
| <b>Baseline superficial siderosis, n (%)</b> |            |            |    |
| n                                            | 945        | 993        | NA |
| 0                                            | 924 (97.8) | 967 (97.4) |    |
| 1-3                                          | 20 (2.1)   | 25 (2.5)   | NA |
| > 3                                          | 1 (0.1)    | 1 (0.1)    | NA |
| n, > 0 (%)                                   | 21 (2.2)   | 26 (2.6)   | NA |
| Mean (SD)                                    | 1.3 (0.7)  | 1.7 (0.9)  | NA |
| Median (range)                               | 1.0 (1-4)  | 1.0 (1-5)  | NA |
| Q1-Q3                                        | 1.0-1.0    | 1.0-2.0    | NA |
| <b>Baseline microhemorrhages, n (%)</b>      |            |            |    |
| n                                            | 945        | 993        | NA |
| 0                                            | 845 (89.4) | 913 (91.9) | NA |
| 1-5                                          | 100 (10.6) | 80 (8.1)   | NA |
| > 5                                          | 0          | 0          | NA |
| n, > 0 (%)                                   | 100 (10.6) | 80 (8.1)   | NA |
| Mean (SD)                                    | 1.3 (0.7)  | 1.6 (1.0)  | NA |
| Median (range)                               | 1.0 (1-5)  | 1.0 (1-5)  | NA |
| Q1-Q3                                        | 1.0-1.0    | 1.0-2.0    | NA |

104

105 Abbreviations: AD, Alzheimer disease; ADAS-Cog11, Alzheimer Disease

106 Assessment Scale, Cognition Subscale 11; ADAS-Cog13, Alzheimer Disease

107 Assessment Scale, Cognition Subscale 13; ADCS-ADL, Alzheimer Disease

108 Cooperative Study Group Activities of Daily Living; APOE, apolipoprotein E; BMI,

109 Body Mass Index; CDR, Clinical Dementia Rating – Global Score; CDR, Clinical  
110 Dementia Rating – Sum of Boxes; FAQ, Functional Activities Questionnaire; FCSRT,  
111 Free and Cued Selective Reminding Test; MMSE, Mini-Mental State Examination;  
112 MRI, magnetic resonance imaging; Q, quartile; SD, standard deviation.

113 <sup>a</sup> Self-declared race and ethnicity were collected for the purpose of pre-specified  
114 subgroup analyses.

115 <sup>b</sup> Reported as unknown if not allowed to be collected based on local regulation.

116

**eTable 2. PostGraduate: Demographic and Baseline Characteristics**

| <b>Characteristics</b>                  | <b>Previous Treatment:<br/>Placebo<br/>(n = 705)</b> | <b>Previous Treatment:<br/>Gantenerumab<br/>(n = 676)</b> |
|-----------------------------------------|------------------------------------------------------|-----------------------------------------------------------|
| <b>Sex, n (%)</b>                       |                                                      |                                                           |
| Female                                  | 394 (55.9)                                           | 400 (59.2)                                                |
| Male                                    | 311 (44.1)                                           | 276 (40.8)                                                |
| <b>Age, mean (SD), y</b>                | 73.7 (7.5)                                           | 73.0 (7.7)                                                |
| <b>Weight, mean (SD), kg</b>            | 68.1 (13.8)                                          | 68.8 (13.8)                                               |
| <b>BMI, mean (SD), kg/m<sup>2</sup></b> | 25.2 (4.2)                                           | 25.5 (4.4)                                                |
| <b>Race, n (%)<sup>a</sup></b>          |                                                      |                                                           |
| American Indian or Alaska Native        | 25 (3.5)                                             | 22 (3.3)                                                  |
| Asian                                   | 105 (14.9)                                           | 88 (13.0)                                                 |
| Black or African American               | 6 (0.9)                                              | 4 (0.6)                                                   |
| White                                   | 557 (79.0)                                           | 546 (80.8)                                                |
| Unknown <sup>b</sup>                    | 12 (1.7)                                             | 16 (2.4)                                                  |
| <b>Ethnicity, n. (%)<sup>a</sup></b>    |                                                      |                                                           |
| Hispanic or Latino                      | 120 (17.0)                                           | 105 (15.5)                                                |
| Not Hispanic or Latino                  | 581 (82.4)                                           | 566 (83.7)                                                |
| Not stated                              | 1 (0.1)                                              | 3 (0.4)                                                   |
| Unknown                                 | 3 (0.4)                                              | 2 (0.3)                                                   |
| <b>Education, mean (SD), y</b>          | 13.6 (4.2)                                           | 13.2 (4.0)                                                |
| <b>APOE carrier, n (%)</b>              |                                                      |                                                           |
| Carrier                                 | 488 (69.2)                                           | 452 (66.9)                                                |
| Non-carrier                             | 217 (30.8)                                           | 224 (33.1)                                                |
| <b>APOE allele, n (%)</b>               |                                                      |                                                           |
| 0 APOE ε4 (non-carrier)                 | 217 (30.8%)                                          | 224 (33.1%)                                               |

|                                  |             |             |
|----------------------------------|-------------|-------------|
| 1 APOE ε4 (heterozygous carrier) | 373 (52.9%) | 344 (50.9%) |
| 2 APOE ε4 (homozygous carrier)   | 115 (16.3%) | 108 (16.0%) |

118

119 Abbreviations: APOE, apolipoprotein E; BMI, body mass index; OLE, open-label  
120 extension; SD, standard deviation.

121 Baseline (OLE study day 1) was considered the first dosing visit in the OLE (first  
122 dosing in PostGraduate study or first dosing in the OLE period of the parent  
123 GRADUATE studies). The number shown included all the participants who  
124 completed the up-titration either in the parent GRADUATE study or in the  
125 PostGraduate study.

126 <sup>a</sup> Self-declared race and ethnicity were collected for the purpose of pre-specified  
127 subgroup analyses.

128 <sup>b</sup> Reported as unknown if not allowed to be collected based on local regulation.

129

130 eTable 3. Analysis for Risk Factors of ARIA-E in GRADUATE I and II,  
 131 Demographic and Baseline Characteristics of Participants

|                                     | No ARIA-E<br>(n = 746) | ARIA-E<br>(n = 247) | Total<br>(N = 993) |
|-------------------------------------|------------------------|---------------------|--------------------|
| <b>Study, n (%)</b>                 |                        |                     |                    |
| n                                   | 746                    | 247                 | 993                |
| GRADUATE I                          | 378 (50.7)             | 119 (48.2)          | 497 (50.1)         |
| GRADUATE II                         | 368 (49.3)             | 128 (51.8)          | 496 (49.9)         |
| <b>Sex, n (%)</b>                   |                        |                     |                    |
| n                                   | 746                    | 247                 | 993                |
| Female                              | 415 (55.6)             | 160 (64.8)          | 575 (57.9)         |
| Male                                | 331 (44.4)             | 87 (35.2)           | 418 (42.1)         |
| <b>Race, n (%)<sup>a</sup></b>      |                        |                     |                    |
| n                                   | 746                    | 247                 | 993                |
| White                               | 628 (84.2)             | 210 (85.0)          | 838 (84.4)         |
| American Indian or Alaska Native    | 22 (2.9)               | 8 (3.2)             | 30 (3.0)           |
| Asian                               | 80 (10.7)              | 25 (10.1)           | 105 (10.6)         |
| Black or African American           | 4 (0.5)                | 2 (0.8)             | 6 (0.6)            |
| Unknown <sup>b</sup>                | 12 (1.6)               | 2 (0.8)             | 14 (1.4)           |
| <b>Ethnicity, n (%)<sup>a</sup></b> |                        |                     |                    |
| n                                   | 746                    | 247                 | 993                |
| Not Hispanic or Latino              | 618 (82.8)             | 206 (83.4)          | 824 (83.0)         |
| Hispanic or Latino                  | 122 (16.4)             | 39 (15.8)           | 161 (16.2)         |
| Not reported                        | 3 (0.4)                | 2 (0.8)             | 5 (0.5)            |
| Unknown                             | 3 (0.4)                | 0                   | 3 (0.3)            |
| <b>Geographic region, n (%)</b>     |                        |                     |                    |
| n                                   | 746                    | 247                 | 993                |

|                                                                  |              |              |              |
|------------------------------------------------------------------|--------------|--------------|--------------|
| Western Europe and Australia                                     | 342 (45.8)   | 108 (43.7)   | 450 (45.3)   |
| North America                                                    | 187 (25.1)   | 73 (29.6)    | 260 (26.2)   |
| Others                                                           | 217 (29.1)   | 66 (26.7)    | 283 (28.5)   |
| <b>Age, years</b>                                                |              |              |              |
| n                                                                | 746          | 247          | 993          |
| Mean (SD)                                                        | 71.44 (8.13) | 70.98 (6.90) | 71.33 (7.84) |
| Median (range)                                                   | 72 (50–90)   | 71 (51–88)   | 72 (50–90)   |
| <b>AD disease stage, n (%)</b>                                   |              |              |              |
| n                                                                | 746          | 247          | 993          |
| Mild                                                             | 343 (46.0)   | 108 (43.7)   | 451 (45.4)   |
| Prodromal                                                        | 403 (54.0)   | 139 (56.3)   | 542 (54.6)   |
| <b>Use of symptomatic AD medication, n (%)</b>                   |              |              |              |
| n                                                                | 746          | 247          | 993          |
| No                                                               | 265 (35.5)   | 87 (35.2)    | 352 (35.4)   |
| Yes                                                              | 481 (64.5)   | 160 (64.8)   | 641 (64.6)   |
| <b>Number of APOE <math>\epsilon</math>4 alleles, n (%)</b>      |              |              |              |
| n                                                                | 746          | 247          | 993          |
| 0 APOE $\epsilon$ 4 (non-carrier)                                | 291 (39.0)   | 44 (17.8)    | 335 (33.7)   |
| 1 APOE $\epsilon$ 4 (heterozygous carrier)                       | 361 (48.4)   | 117 (47.4)   | 478 (48.1)   |
| 2 APOE $\epsilon$ 4 (homozygous carrier)                         | 94 (12.6)    | 86 (34.8)    | 180 (18.1)   |
| <b>Presence of microhemorrhages and/or superficial siderosis</b> |              |              |              |
| n                                                                | 746          | 247          | 993          |
| Absent                                                           | 677 (90.8)   | 219 (88.7)   | 896 (90.2)   |
| Present                                                          | 69 (9.2)     | 28 (11.3)    | 97 (9.8)     |

|                              | <b>No ARIA-E<br/>(n = 746)</b> | <b>ARIA-E<br/>(n = 247)</b> | <b>Total<br/>(N = 993)</b> |
|------------------------------|--------------------------------|-----------------------------|----------------------------|
| <b>Weight, kg</b>            |                                |                             |                            |
| n                            | 746                            | 247                         | 993                        |
| Mean (SD)                    | 69.98 (14.69)                  | 67.73 (14.49)               | 69.42 (14.67)              |
| Median (range)               | 68.9 (36.3–130.2)              | 67.0 (39.1–133.8)           | 68.0 (36.3–133.8)          |
| <b>BMI, kg/m<sup>2</sup></b> |                                |                             |                            |
| n                            | 743                            | 243                         | 986                        |
| Mean (SD)                    | 25.65 (4.32)                   | 25.11 (4.05)                | 25.51 (4.26)               |
| Median (range)               | 25.2 (15.61–42.31)             | 25.0 (16.16–41.14)          | 25.1 (15.61–42.31)         |
| <b>CDR-SB score</b>          |                                |                             |                            |
| n                            | 745                            | 247                         | 992                        |
| Mean (SD)                    | 3.69 (1.63)                    | 3.66 (1.69)                 | 3.68 (1.64)                |
| Median (range)               | 3.5 (0.5–10)                   | 3.5 (0.5–10)                | 3.5 (0.5–10)               |
| <b>CDR-GS, n (%)</b>         |                                |                             |                            |
| n                            | 745                            | 247                         | 992                        |
| 0.5                          | 516 (69.3)                     | 172 (69.6)                  | 688 (69.4)                 |
| 1                            | 222 (29.8)                     | 73 (29.6)                   | 295 (29.7)                 |
| 2                            | 7 (0.9)                        | 2 (0.8)                     | 9 (0.9)                    |
| <b>MMSE</b>                  |                                |                             |                            |
| n                            | 745                            | 247                         | 992                        |
| Mean (SD)                    | 23.63 (3.11)                   | 23.50 (3.30)                | 23.59 (3.16)               |
| Median (range)               | 24 (13–30)                     | 24 (10–30)                  | 24 (10–30)                 |
| <b>ADAS-Cog13</b>            |                                |                             |                            |
| n                            | 738                            | 246                         | 984                        |
| Mean (SD)                    | 28.00 (7.11)                   | 28.48 (6.50)                | 28.12 (6.97)               |
| Median (range)               | 28 (6–54)                      | 28 (10–58)                  | 28 (6–58)                  |



|                                                         |                |                |                |
|---------------------------------------------------------|----------------|----------------|----------------|
| <b>Diastolic blood pressure, mmHg</b>                   |                |                |                |
| n                                                       | 746            | 247            | 993            |
| Mean (SD)                                               | 75.78 (8.89)   | 76.60 (9.12)   | 75.98 (8.95)   |
| Median (range)                                          | 76 (51–102)    | 77 (54–110)    | 76 (51–110)    |
| <b>Systolic blood pressure, mmHg</b>                    |                |                |                |
| n                                                       | 746            | 247            | 993            |
| Mean (SD)                                               | 131.87 (15.05) | 134.28 (15.85) | 132.47 (15.28) |
| Median (range)                                          | 131 (90–195)   | 134 (95–185)   | 132 (90–195)   |
| <b>Pulse pressure, mmHg</b>                             |                |                |                |
| n                                                       | 746            | 247            | 993            |
| Mean (SD)                                               | 56.10 (13.31)  | 57.68 (14.18)  | 56.49 (13.54)  |
| Median (range)                                          | 55 (20–105)    | 56 (20–103)    | 55 (20–105)    |
| <b>Total microhemorrhages and superficial siderosis</b> |                |                |                |
| n                                                       | 746            | 247            | 993            |
| Mean (SD)                                               | 0.15 (0.58)    | 0.25 (0.80)    | 0.17 (0.64)    |
| Median (range)                                          | 0 (0–6)        | 0 (0–5)        | 0 (0–6)        |
| <b>Total microhemorrhages</b>                           |                |                |                |
| n                                                       | 746            | 247            | 993            |
| Mean (SD)                                               | 0.11 (0.46)    | 0.18 (0.70)    | 0.13 (0.53)    |
| Median (range)                                          | 0 (0–5)        | 0 (0–5)        | 0 (0–5)        |
| <b>Total SS</b>                                         |                |                |                |
| n                                                       | 746            | 247            | 993            |
| Mean (SD)                                               | 0.04 (0.29)    | 0.06 (0.33)    | 0.04 (0.30)    |
| Median (range)                                          | 0 (0–5)        | 0 (0–3)        | 0 (0–5)        |

133

134

|                                              | No ARIA-E<br>(n = 746) | ARIA-E<br>(n = 247) | Total<br>(N = 993) |
|----------------------------------------------|------------------------|---------------------|--------------------|
| <b>Fazekas score</b>                         |                        |                     |                    |
| n                                            | 746                    | 247                 | 993                |
| Mean (SD)                                    | 0.69 (0.58)            | 0.85 (0.58)         | 0.73 (0.58)        |
| Median (range)                               | 1 (0–2)                | 1 (0–2)             | 1 (0–2)            |
| <b>CSF A<math>\beta</math>42, LT</b>         |                        |                     |                    |
| n                                            | 222                    | 67                  | 289                |
| Mean (SD)                                    | 9.13 (0.45)            | 8.89 (0.5)          | 9.07 (0.47)        |
| Median (range)                               | 9.2 (7.96–10.47)       | 8.8 (7.48–9.87)     | 9.1 (7.48–10.47)   |
| <b>CSF total tau, LT</b>                     |                        |                     |                    |
| n                                            | 222                    | 67                  | 289                |
| Mean (SD)                                    | 8.14 (0.53)            | 8.3 (0.61)          | 8.18 (0.56)        |
| Median (range)                               | 8.2 (6.58–9.68)        | 8.3 (6.68–9.68)     | 8.2 (6.58–9.68)    |
| <b>CSF phosphorylated tau, LT</b>            |                        |                     |                    |
| n                                            | 222                    | 67                  | 289                |
| Mean (SD)                                    | 4.82 (0.58)            | 5.03 (0.65)         | 4.87 (0.6)         |
| Median (range)                               | 4.9 (3.19–6.57)        | 5.1 (3.12–6.5)      | 4.9 (3.12–6.57)    |
| <b>CSF A<math>\beta</math>40, LT</b>         |                        |                     |                    |
| n                                            | 217                    | 66                  | 283                |
| Mean (SD)                                    | 13.91 (0.5)            | 13.9 (0.5)          | 13.91 (0.5)        |
| Median (range)                               | 13.9 (12.42–15.03)     | 13.9 (12.2–15.05)   | 13.9 (12.2–15.05)  |
| <b>CSF <math>\alpha</math>-synuclein, LT</b> |                        |                     |                    |
| n                                            | 216                    | 67                  | 283                |
| Mean (SD)                                    | 7.99 (0.78)            | 8.08 (0.71)         | 8.01 (0.77)        |
| Median (range)                               | 7.9 (5.98–11.18)       | 8.1 (6.47–10.95)    | 7.9 (5.98–11.18)   |

|                                    |                    |                   |                    |
|------------------------------------|--------------------|-------------------|--------------------|
| <b>CSF sTREM2, LT</b>              |                    |                   |                    |
| n                                  | 218                | 67                | 285                |
| Mean (SD)                          | 3.45 (0.58)        | 3.53 (0.49)       | 3.47 (0.56)        |
| Median (range)                     | 3.5 (-0.82–4.56)   | 3.5 (2.32–4.61)   | 3.5 (-0.82–4.61)   |
| <b>CSF NfL, LT</b>                 |                    |                   |                    |
| n                                  | 219                | 67                | 286                |
| Mean (SD)                          | 7.44 (0.69)        | 7.46 (0.6)        | 7.44 (0.67)        |
| Median (range)                     | 7.4 (5.67–10.46)   | 7.5 (5.96–9.08)   | 7.4 (5.67–10.46)   |
| <b>CSF neurogranin, LT</b>         |                    |                   |                    |
| n                                  | 218                | 67                | 285                |
| Mean (SD)                          | 10.25 (0.55)       | 10.35 (0.62)      | 10.28 (0.57)       |
| Median (range)                     | 10.3 (8.63–12.26)  | 10.4 (8.47–12.08) | 10.3 (8.47–12.26)  |
| <b>CSF YKL-40 glycoprotein, LT</b> |                    |                   |                    |
| n                                  | 219                | 67                | 286                |
| Mean (SD)                          | 17.7 (0.58)        | 17.8 (0.49)       | 17.72 (0.56)       |
| Median (range)                     | 17.7 (16.09–19.26) | 17.8 (16.3–19.07) | 17.7 (16.09–19.26) |
| <b>CSF GFAP, LT</b>                |                    |                   |                    |
| n                                  | 219                | 67                | 286                |
| Mean (SD)                          | 13.46 (0.66)       | 13.46 (0.59)      | 13.46 (0.64)       |
| Median (range)                     | 13.4 (11.95–17.21) | 13.6 (12.1–14.98) | 13.4 (11.95–17.21) |
| <b>CSF S100</b>                    |                    |                   |                    |
| n                                  | 217                | 67                | 284                |
| Mean (SD)                          | -0.26 (0.48)       | -0.24 (0.44)      | -0.26 (0.47)       |
| Median (range)                     | -0.3 (-1.78–1.82)  | -0.3 (-1.11–0.98) | -0.3 (-1.78–1.82)  |

|                                          | No ARIA-E<br>(n = 746) | ARIA-E<br>(n = 247) | Total<br>(N = 993) |
|------------------------------------------|------------------------|---------------------|--------------------|
| <b>Plasma A<math>\beta</math>40, LT</b>  |                        |                     |                    |
| n                                        | 743                    | 246                 | 989                |
| Mean (SD)                                | 4.9 (0.35)             | 4.89 (0.34)         | 4.9 (0.35)         |
| Median (range)                           | 4.9 (1.83–6.61)        | 4.9 (2.75–6.79)     | 4.9 (1.83–6.79)    |
| <b>Plasma phosphorylated tau 181, LT</b> |                        |                     |                    |
| n                                        | 743                    | 246                 | 989                |
| Mean (SD)                                | 0.56 (0.54)            | 0.57 (0.49)         | 0.56 (0.53)        |
| Median (range)                           | 0.6 (-1.91–2.68)       | 0.6 (-0.85–2.52)    | 0.6 (-1.91–2.68)   |
| <b>Plasma GDF 15, LT</b>                 |                        |                     |                    |
| n                                        | 687                    | 229                 | 916                |
| Mean (SD)                                | 10.26 (0.61)           | 10.18 (0.56)        | 10.24 (0.6)        |
| Median (range)                           | 10.2 (8.84–12.46)      | 10.2 (8.9–12.08)    | 10.2 (8.84–12.46)  |
| <b>Plasma homocysteine, LT</b>           |                        |                     |                    |
| n                                        | 742                    | 246                 | 988                |
| Mean (SD)                                | 3.82 (0.38)            | 3.81 (0.4)          | 3.82 (0.38)        |
| Median (range)                           | 3.8 (2.46–5.21)        | 3.8 (2.94–5.03)     | 3.8 (2.46–5.21)    |
| <b>Plasma NfL, LT</b>                    |                        |                     |                    |
| n                                        | 737                    | 244                 | 981                |
| Mean (SD)                                | 1.99 (0.63)            | 1.94 (0.54)         | 1.98 (0.61)        |
| Median (range)                           | 2 (-0.87–4.88)         | 1.9 (0.24–3.71)     | 2 (-0.87–4.88)     |
| <b>Plasma A<math>\beta</math>40, LT</b>  |                        |                     |                    |
| n                                        | 743                    | 246                 | 989                |
| Mean (SD)                                | 8.17 (0.32)            | 8.15 (0.29)         | 8.16 (0.31)        |
| Median (range)                           | 8.2 (4.58–9.9)         | 8.2 (6.38–9.89)     | 8.2 (4.58–9.9)     |

|                                             |                          |                          |                          |
|---------------------------------------------|--------------------------|--------------------------|--------------------------|
| <b>Plasma phosphorylated 217 tau, LT</b>    |                          |                          |                          |
| n                                           | 541                      | 173                      | 714                      |
| Mean (SD)                                   | -0.95 (0.67)             | -0.92 (0.53)             | -0.94 (0.64)             |
| Median (range)                              | -0.9 (-3.8–1.01)         | -1 (2.16–0.95)           | -0.9 (-3.8–1.01)         |
| <b>Plasma GFAP, LT</b>                      |                          |                          |                          |
| n                                           | 739                      | 246                      | 985                      |
| Mean (SD)                                   | 7.25 (0.62)              | 7.3 (0.6)                | 7.26 (0.62)              |
| Median (range)                              | 7.3 (5.07–9.79)          | 7.2 (5.69–11.23)         | 7.3 (5.07–11.23)         |
| <b>Amyloid PET, CL</b>                      |                          |                          |                          |
| n                                           | 448                      | 162                      | 610                      |
| Mean (SD)                                   | 91.93 (28.44)            | 97.61 (29.89)            | 93.44 (28.91)            |
| Median (range)                              | 92.4 (5.30–175.67)       | 96.6 (12.15–201.92)      | 93.4 (5.30–201.92)       |
| <b>Volumetric MRI, cortical grey matter</b> |                          |                          |                          |
| n                                           | 743                      | 247                      | 990                      |
| Mean (SD)                                   | 517.44 (36.18)           | 523.77 (35.45)           | 519.02 (36.08)           |
| Median (range)                              | 518.8 (380.80–622.03)    | 522.4 (420.56–635.89)    | 519.8 (380.80–635.89)    |
| <b>Volumetric MRI, whole brain</b>          |                          |                          |                          |
| n                                           | 745                      | 247                      | 992                      |
| Mean (SD)                                   | 1309.02 (64.56)          | 1323.65 (66.30)          | 1312.67 (65.27)          |
| Median (range)                              | 1307.7 (1113.67–1525.80) | 1319.2 (1114.89–1572.85) | 1311.1 (1113.67–1572.85) |

136

137

138

139

|                                            | No ARIA-E<br>(n = 746) | ARIA-E<br>(n = 247) | Total<br>(N = 993) |
|--------------------------------------------|------------------------|---------------------|--------------------|
| <b>Volumetric MRI, total hippocampus</b>   |                        |                     |                    |
| n                                          | 745                    | 247                 | 992                |
| Mean (SD)                                  | 6.32 (1.12)            | 6.05 (1.04)         | 6.25 (1.11)        |
| Median (range)                             | 6.3 (2.80–9.75)        | 6.0 (3.14–8.56)     | 6.2 (2.80–9.75)    |
| <b>Presence of lacunar infarcts, n (%)</b> |                        |                     |                    |
| n                                          | 746                    | 247                 | 993                |
| No                                         | 728 (97.6)             | 240 (97.2)          | 968 (97.5)         |
| Yes                                        | 18 (2.4)               | 7 (2.8)             | 25 (2.5)           |
| <b>Diabetes, n (%)</b>                     |                        |                     |                    |
| n                                          | 746                    | 247                 | 993                |
| No                                         | 635 (85.1)             | 223 (90.3)          | 858 (86.4)         |
| Yes                                        | 111 (14.9)             | 24 (9.7)            | 135 (13.6)         |
| <b>Dyslipidemia, n (%)</b>                 |                        |                     |                    |
| n                                          | 746                    | 247                 | 993                |
| No                                         | 124 (16.6)             | 24 (9.7)            | 148 (14.9)         |
| Yes                                        | 622 (83.4)             | 223 (90.3)          | 845 (85.1)         |
| <b>Hypertension, n (%)</b>                 |                        |                     |                    |
| n                                          | 746                    | 247                 | 993                |
| No                                         | 381 (51.1)             | 135 (54.7)          | 516 (52.0)         |
| Yes                                        | 365 (48.9)             | 112 (45.3)          | 477 (48.0)         |
| <b>Any cardiovascular risk flag, n (%)</b> |                        |                     |                    |
| n                                          | 746                    | 247                 | 993                |
| No                                         | 52 (7.0)               | 18 (7.3)            | 70 (7.0)           |
| Yes                                        | 694 (93.0)             | 229 (92.7)          | 923 (93.0)         |

|                                    |                    |                    |                    |
|------------------------------------|--------------------|--------------------|--------------------|
| <b>Vitamin B12, LT</b>             |                    |                    |                    |
| n                                  | 746                | 246                | 992                |
| Mean (SD)                          | 8.29 (1.01)        | 8.28 (0.83)        | 8.29 (0.97)        |
| Median (range)                     | 8.1 (6.79–14.55)   | 8.1 (6.92–12.83)   | 8.1 (6.79–14.55)   |
| <b>Methylmalonic acid, LT</b>      |                    |                    |                    |
| n                                  | 744                | 247                | 991                |
| Mean (SD)                          | 7.4 (0.58)         | 7.42 (0.52)        | 7.4 (0.57)         |
| Median (range)                     | 7.4 (4.64–9.86)    | 7.4 (6.07–8.71)    | 7.4 (4.64–9.86)    |
| <b>Folic acid, LT</b>              |                    |                    |                    |
| n                                  | 746                | 246                | 992                |
| Mean (SD)                          | 5.2 (1.19)         | 5.14 (1.22)        | 5.18 (1.2)         |
| Median (range)                     | 5 (2.96–9.81)      | 4.9 (3.2–9.81)     | 5 (2.96–9.81)      |
| <b>Hemoglobin A1c, LT</b>          |                    |                    |                    |
| n                                  | 743                | 246                | 989                |
| Mean (SD)                          | 5.26 (0.19)        | 5.25 (0.17)        | 5.26 (0.19)        |
| Median (range)                     | 5.2 (4.74–6)       | 5.2 (4.62–5.84)    | 5.2 (4.62–6)       |
| <b>Antiplatelet therapy, n (%)</b> |                    |                    |                    |
| n                                  | 746                | 247                | 993                |
| No                                 | 562 (75.3)         | 188 (76.1)         | 750 (75.5)         |
| Yes                                | 184 (24.7)         | 59 (23.9)          | 243 (24.5)         |
| <b>CSF NPTX2, LT</b>               |                    |                    |                    |
| n                                  | 218                | 67                 | 285                |
| Mean (SD)                          | 12.18 (0.7)        | 12.24 (0.68)       | 12.2 (0.69)        |
| Median (range)                     | 12.2 (10.48–13.74) | 12.2 (10.76–13.79) | 12.2 (10.48–13.79) |

140

141 Abbreviations: AD, Alzheimer disease; ADAS-Cog13, Alzheimer Disease

142 Assessment Scale, Cognition Subscale 13; APOE, apolipoprotein E; ARIA-E,

143 amyloid-related imaging abnormalities-edema; BMI, Body Mass Index; CDR, Clinical  
144 Dementia Rating; CDR-GS, Clinical Dementia Rating-global score; CDR-SB, Clinical  
145 Dementia Rating-Sum of Boxes; CSF, cerebrospinal fluid; GDF-15, growth  
146 differentiation factor 15; GFAP, glial fibrillary acidic protein; LT, Log 2 transformed;  
147 MMSE, mini mental state examination; MRI, magnetic resonance imaging; NPTX2,  
148 neuronal pentraxin 2; PET, positron emission tomography; SD, standard deviation;  
149 SS, superficial siderosis; sTREM2, soluble triggering receptor expressed on myeloid  
150 cells 2.

151 All the variables as measured at baseline unless indicated otherwise.

152 <sup>a</sup> Self-declared race and ethnicity were collected for the purpose of pre-specified  
153 subgroup analyses.

154 <sup>b</sup> Reported as unknown if not allowed to be collected based on local regulation.

155



156 **eTable 4. Risk Factors for ARIA-E With Concurrent ARIA-H: Multivariate**  
 157 **Modeling With Stepwise Logistic Regression for Baseline Variables With**  
 158 **Univariate  $P < .05$**

| Variable                                                                   | Odds Ratio [95% CI]  |
|----------------------------------------------------------------------------|----------------------|
| <b><i>Clinical variables and plasma biomarkers model</i></b>               |                      |
| APOE ε4 homozygous carrier                                                 | 6.276 [3.505–11.237] |
| Fazekas score at screening                                                 | 2.206 [1.559–3.123]  |
| APOE ε4 heterozygous carrier                                               | 2.079 [1.209–3.575]  |
| Total microhemorrhages and SS at screening                                 | 1.452 [1.151–1.83]   |
| Volumetric MRI – cortical gray matter (mL)                                 | 1.007 [1.001–1.013]  |
| Volumetric MRI – total hippocampus (mL)                                    | 0.791 [0.651–0.96]   |
| <b><i>Clinical variables and plasma + CSF Biomarkers model</i></b>         |                      |
| APOE ε4 homozygous carrier                                                 | 6.926 [2.01–23.866]  |
| Fazekas score at screening                                                 | 4.478 [1.872–10.713] |
| CSF phosphorylated tau (LT)                                                | 3.824 [1.837–7.958]  |
| Total microhemorrhages and SS at screening                                 | 3.109 [0.92–10.511]  |
| APOE ε4 heterozygous carrier                                               | 2.287 [0.75–6.972]   |
| CSF Aβ <sub>42</sub> (LT)                                                  | 0.163 [0.06–0.442]   |
| Presence of microhemorrhages and/or SS at screening                        | 0.125 [0.007–2.131]  |
| <b><i>Clinical variables and plasma + amyloid PET biomarkers model</i></b> |                      |
| APOE ε4 homozygous carrier                                                 | 5.904 [2.734–12.747] |
| Fazekas score at screening                                                 | 2.095 [1.36–3.227]   |
| APOE ε4 heterozygous carrier                                               | 2.072 [1.02–4.21]    |
| Total microhemorrhages and SS at screening                                 | 1.713 [1.285–2.285]  |
| Amyloid PET (CL)                                                           | 1.012 [1.004–1.021]  |
| Volumetric MRI – cortical gray matter (mL)                                 | 1.008 [1.001–1.016]  |

|                                         |                     |
|-----------------------------------------|---------------------|
| Volumetric MRI – total hippocampus (mL) | 0.761 [0.594–0.975] |
|-----------------------------------------|---------------------|

159

160 Abbreviations: A $\beta$ , amyloid-beta; APOE, apolipoprotein E; ARIA-E, amyloid-related  
161 imaging abnormalities – edema; CI, confidence interval; CSF, cerebrospinal fluid; LT,  
162 log<sub>2</sub> transformed; MRI, magnetic resonance imaging; PET, positron emission  
163 tomography.

164 APOE  $\epsilon$ 4 and the presence of microhemorrhages and/or superficial siderosis are  
165 treated as categorical variables, with APOE 0 $\epsilon$ 4 and microhemorrhage and/or  
166 superficial siderosis absence as the reference levels.

167 All the variables as measured at baseline unless indicated otherwise.

168

169 **eTable 5. GRADUATE I and II: Nature and Severity of CNS Symptoms in Serious**  
 170 **Symptomatic ARIA-E Cases**

| <b>MedDRA SOC, MedDRA Preferred Term</b> | <b>Intensity</b> | <b>Placebo (n = 946)</b> | <b>Gantenerumab (n = 993)</b> |
|------------------------------------------|------------------|--------------------------|-------------------------------|
| <b>Any event, no. (%)</b>                | Any              | 0                        | 12 (1.2)                      |
|                                          | Mild             | 0                        | 1 (0.1)                       |
|                                          | Moderate         | 0                        | 4 (0.4)                       |
|                                          | Severe           | 0                        | 7 (0.7)                       |
| <b>Nervous system disorders, n (%)</b>   |                  |                          |                               |
| Overall                                  | Any              | 0                        | 8 (0.8)                       |
|                                          | Mild             | 0                        | 1 (0.1)                       |
|                                          | Moderate         | 0                        | 2 (0.2)                       |
|                                          | Severe           | 0                        | 5 (0.5)                       |
| Aphasia                                  | Any              | 0                        | 3 (0.3)                       |
|                                          | Mild             | 0                        | 0                             |
|                                          | Moderate         | 0                        | 2 (0.2)                       |
|                                          | Severe           | 0                        | 1 (0.1)                       |
| Headache                                 | Any              | 0                        | 3 (0.3)                       |
|                                          | Mild             | 0                        | 1 (0.1)                       |
|                                          | Moderate         | 0                        | 2 (0.2)                       |
|                                          | Severe           | 0                        | 0                             |
| Encephalopathy                           | Any              | 0                        | 2 (0.2)                       |
|                                          | Mild             | 0                        | 0                             |
|                                          | Moderate         | 0                        | 0                             |
|                                          | Severe           | 0                        | 2 (0.2)                       |
| Apraxia                                  | Any              | 0                        | 1 (0.1)                       |
|                                          | Mild             | 0                        | 0                             |

|                             |          |   |         |
|-----------------------------|----------|---|---------|
|                             | Moderate | 0 | 1 (0.1) |
|                             | Severe   | 0 | 0       |
| Dizziness                   | Any      | 0 | 1 (0.1) |
|                             | Mild     | 0 | 0       |
|                             | Moderate | 0 | 0       |
|                             | Severe   | 0 | 1 (0.1) |
| Dysarthria                  | Any      | 0 | 1 (0.1) |
|                             | Mild     | 0 | 0       |
|                             | Moderate | 0 | 0       |
|                             | Severe   | 0 | 1 (0.1) |
| Dyspraxia                   | Any      | 0 | 1 (0.1) |
|                             | Mild     | 0 | 0       |
|                             | Moderate | 0 | 1 (0.1) |
|                             | Severe   | 0 | 0       |
| Focal dyscognitive seizures | Any      | 0 | 1 (0.1) |
|                             | Mild     | 0 | 0       |
|                             | Moderate | 0 | 0       |
|                             | Severe   | 0 | 1 (0.1) |
| Hemianopia                  | Any      | 0 | 1 (0.1) |
|                             | Mild     | 0 | 0       |
|                             | Moderate | 0 | 0       |
|                             | Severe   | 0 | 1 (0.1) |

171

172

173

174

175

| <b>MedDRA System Organ Class, MedDRA Preferred Term</b> | <b>Intensity</b> | <b>Placebo (n = 946)</b> | <b>Gantenerumab (n = 993)</b> |
|---------------------------------------------------------|------------------|--------------------------|-------------------------------|
| Hemiparesis                                             | Any              | 0                        | 1 (0.1)                       |
|                                                         | Mild             | 0                        | 0                             |
|                                                         | Moderate         | 0                        | 0                             |
|                                                         | Severe           | 0                        | 1 (0.1)                       |
| Memory impairment                                       | Any              | 0                        | 1 (0.1)                       |
|                                                         | Mild             | 0                        | 1 (0.1)                       |
|                                                         | Moderate         | 0                        | 0                             |
|                                                         | Severe           | 0                        | 0                             |
| Myoclonus                                               | Any              | 0                        | 1 (0.1)                       |
|                                                         | Mild             | 0                        | 0                             |
|                                                         | Moderate         | 0                        | 1 (0.1)                       |
|                                                         | Severe           | 0                        | 0                             |
| Status epilepticus                                      | Any              | 0                        | 1 (0.1)                       |
|                                                         | Mild             | 0                        | 0                             |
|                                                         | Moderate         | 0                        | 1 (0.1)                       |
|                                                         | Severe           | 0                        | 0                             |
| <b>Psychiatric disorders, n (%)</b>                     |                  |                          |                               |
| Overall                                                 | Any              | 0                        | 5 (0.5)                       |
|                                                         | Mild             | 0                        | 1 (0.1)                       |
|                                                         | Moderate         | 0                        | 3 (0.3)                       |
|                                                         | Severe           | 0                        | 1 (0.1)                       |
| Confusional state                                       | Any              | 0                        | 2 (0.2)                       |
|                                                         | Mild             | 0                        | 1 (0.1)                       |
|                                                         | Moderate         | 0                        | 1 (0.1)                       |
|                                                         | Severe           | 0                        | 0                             |

|                         |          |   |         |
|-------------------------|----------|---|---------|
| Mental status changes   | Any      | 0 | 2 (0.2) |
|                         | Mild     | 0 | 0       |
|                         | Moderate | 0 | 1 (0.1) |
|                         | Severe   | 0 | 1 (0.1) |
| Abnormal behavior       | Any      | 0 | 1 (0.1) |
|                         | Mild     | 0 | 0       |
|                         | Moderate | 0 | 1 (0.1) |
|                         | Severe   | 0 | 0       |
| Hallucination, visual   | Any      | 0 | 1 (0.1) |
|                         | Mild     | 0 | 0       |
|                         | Moderate | 0 | 1 (0.1) |
|                         | Severe   | 0 | 0       |
| Psychomotor retardation | Any      | 0 | 1 (0.1) |
|                         | Mild     | 0 | 0       |
|                         | Moderate | 0 | 1 (0.1) |
|                         | Severe   | 0 | 0       |

| <b>MedDRA System Organ Class, MedDRA Preferred Term</b>            | <b>Intensity</b> | <b>Placebo (n = 946)</b> | <b>Gantenerumab (n = 993)</b> |
|--------------------------------------------------------------------|------------------|--------------------------|-------------------------------|
| <b>Ear and labyrinth disorders, n (%)</b>                          |                  |                          |                               |
| Overall                                                            | Any              | 0                        | 1 (0.1)                       |
|                                                                    | Mild             | 0                        | 0                             |
|                                                                    | Moderate         | 0                        | 0                             |
|                                                                    | Severe           | 0                        | 1 (0.1)                       |
| Vestibular disorder                                                | Any              | 0                        | 1 (0.1)                       |
|                                                                    | Mild             | 0                        | 0                             |
|                                                                    | Moderate         | 0                        | 0                             |
|                                                                    | Severe           | 0                        | 1 (0.1)                       |
| <b>Eye disorders, n (%)</b>                                        |                  |                          |                               |
| Overall                                                            | Any              | 0                        | 1 (0.1)                       |
|                                                                    | Mild             | 0                        | 1 (0.1)                       |
|                                                                    | Moderate         | 0                        | 0                             |
|                                                                    | Severe           | 0                        | 0                             |
| Vision blurred                                                     | Any              | 0                        | 1 (0.1)                       |
|                                                                    | Mild             | 0                        | 1 (0.1)                       |
|                                                                    | Moderate         | 0                        | 0                             |
|                                                                    | Severe           | 0                        | 0                             |
| <b>General disorders and administration site conditions, n (%)</b> |                  |                          |                               |
| Overall                                                            | Any              | 0                        | 1 (0.1)                       |
|                                                                    | Mild             | 0                        | 1 (0.1)                       |
|                                                                    | Moderate         | 0                        | 0                             |
|                                                                    | Severe           | 0                        | 0                             |
| Gait disturbance                                                   | Any              | 0                        | 1 (0.1)                       |

|  |          |   |         |
|--|----------|---|---------|
|  | Mild     | 0 | 1 (0.1) |
|  | Moderate | 0 | 0       |
|  | Severe   | 0 | 0       |

177

178 Abbreviations: AE, adverse event; ARIA-E, amyloid-related imaging abnormalities-

179 edema; CNS, central nervous system; MedDRA, Medical Dictionary for Regulatory

180 Activities; MRI, magnetic resonance imaging; SOC, system organ class.

181 Investigator text for AEs is coded using MedDRA version 25.0.

182 All counts represent ARIA-E MRI findings with at least one associated CNS

183 symptom. Multiple occurrences of the same associated CNS symptom with one

184 ARIA-E MRI finding are counted once at the greatest intensity for this preferred term.

185 To the SOC Overall row counts, an ARIA-E MRI finding contributes only with the

186 associated CNS symptoms occurring with the greatest intensity within the SOC.

187 All CNS symptoms temporally associated with ARIA-E MRI findings are considered,

188 and may therefore include some AEs occurring after the AE reporting period, which

189 would not be reported in standard non-CNS AE outputs.

190



191 **eTable 6. GRADUATE I and II: Summary of Changes in Clinical Symptomatology**  
192 **from First to Second ARIA-E Episode, Gantenerumab Arm**

| <b>Symptomatic status of first ARIA-E episode</b> | <b>Symptomatic status of second ARIA-E episode</b> |                    |              |
|---------------------------------------------------|----------------------------------------------------|--------------------|--------------|
|                                                   | <b>Asymptomatic</b>                                | <b>Symptomatic</b> | <b>Total</b> |
| <b>Asymptomatic</b>                               | 70                                                 | 10                 | 80           |
| <b>Symptomatic</b>                                | 12                                                 | 3                  | 15           |
| <b>Total</b>                                      | 82                                                 | 13                 | 95           |

193

194 Abbreviations: ARIA-E, amyloid-related imaging abnormalities – edema.

195

196 **eTable 7. GRADUATE I and II: Summary of Radiological Severity of ARIA-E MRI**  
 197 **Findings by Concurrence with New ARIA-H MRI Findings**

| <b>MRI findings by APOE genotype</b>                                                     | <b>Placebo<br/>(n = 946)</b> | <b>Gantenerumab<br/>(n = 993)</b> |
|------------------------------------------------------------------------------------------|------------------------------|-----------------------------------|
| <b>Radiological severity of all ARIA-E episodes with concurrent new ARIA-H (BGTS)</b>    |                              |                                   |
| n                                                                                        | 7                            | 178                               |
| Mean (SD)                                                                                | 4.1 (2.6)                    | 11.9 (8.9)                        |
| Median                                                                                   | 3.0                          | 9.0                               |
| <b>Radiological severity of all ARIA-E episodes without concurrent new ARIA-H (BGTS)</b> |                              |                                   |
| n                                                                                        | 22                           | 202                               |
| Mean (SD)                                                                                | 3.5 (3.2)                    | 6.4 (5.0)                         |
| Median                                                                                   | 2.5                          | 5.0                               |

198  
 199 Abbreviations: APOE, apolipoprotein E; ARIA-E, amyloid-related imaging  
 200 abnormalities – edema; ARIA-H, amyloid-related imaging abnormalities –  
 201 hemosiderin BGTS, Barkhof Grand Total Scale; MRI, magnetic resonance imaging;  
 202 SD, standard deviation.

203 eFigure 1. GRADUATE I and II: ARIA-Related Dosing Intervention Rules

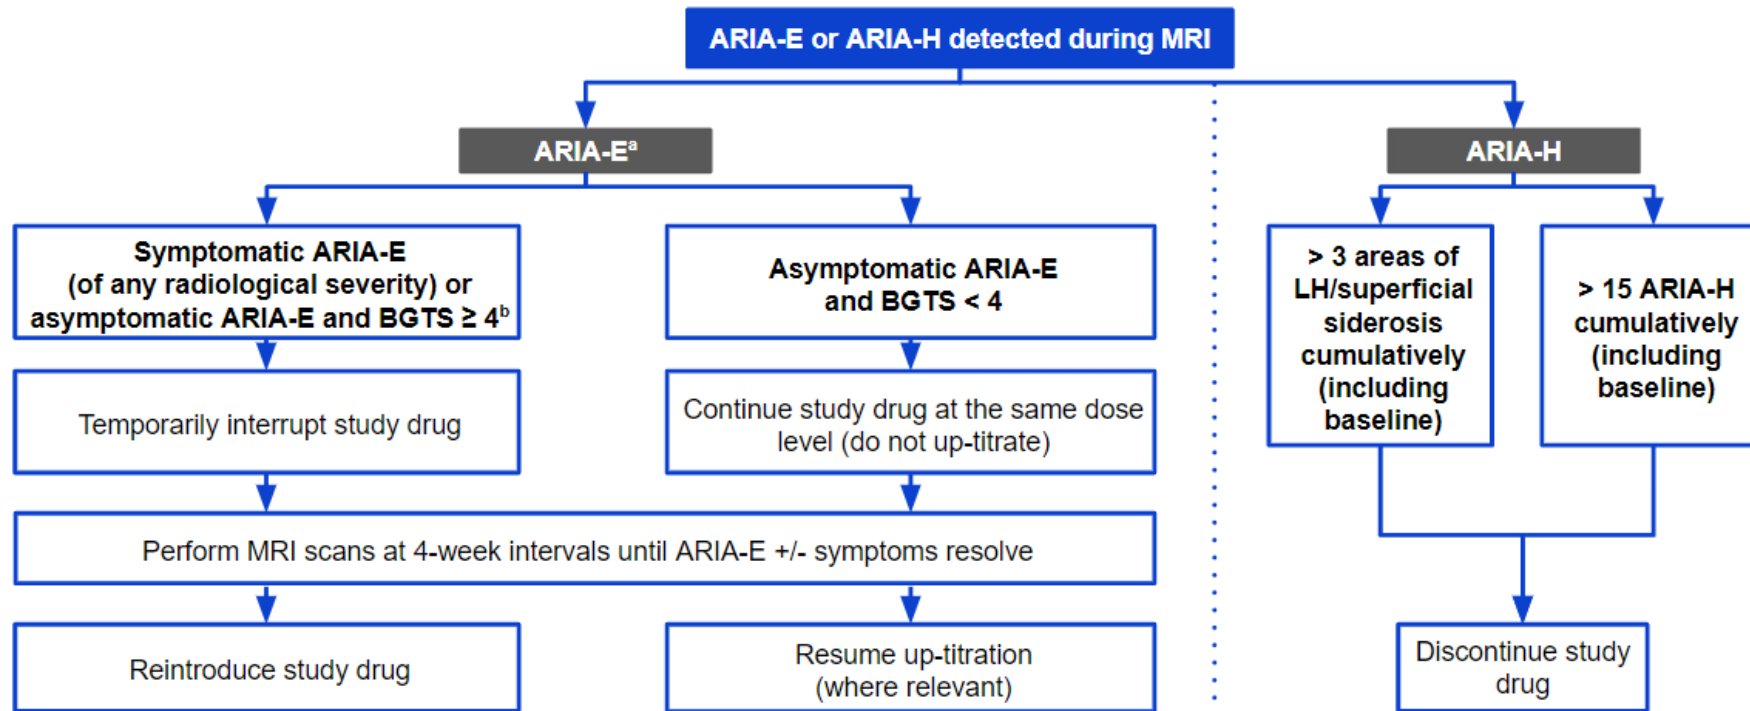

204

205 Abbreviations: AE, adverse event, ARIA-E, amyloid-related imaging abnormalities – edema; ARIA-H, amyloid-related imaging  
206 abnormalities – hemosiderin; BGTS, Barkhof Grand Total Scale; CNS, central nervous system; LH, leptomeningeal hemosiderosis;  
207 MRI, magnetic resonance imaging.

208 <sup>a</sup> Any recurrence of ARIA-E was treated the same as the first event.

209 <sup>b</sup> Symptomatic ARIA-E is defined as ARIA-E temporally associated with CNS symptoms. Symptomatic ARIA-E, ARIA that resulted  
210 in change in study treatment or ARIA otherwise clinically significant in the investigator's judgment were required to be reported as  
211 AE, per the protocol.

212

213

214 **eFigure 2. PostGraduate: Study Design**

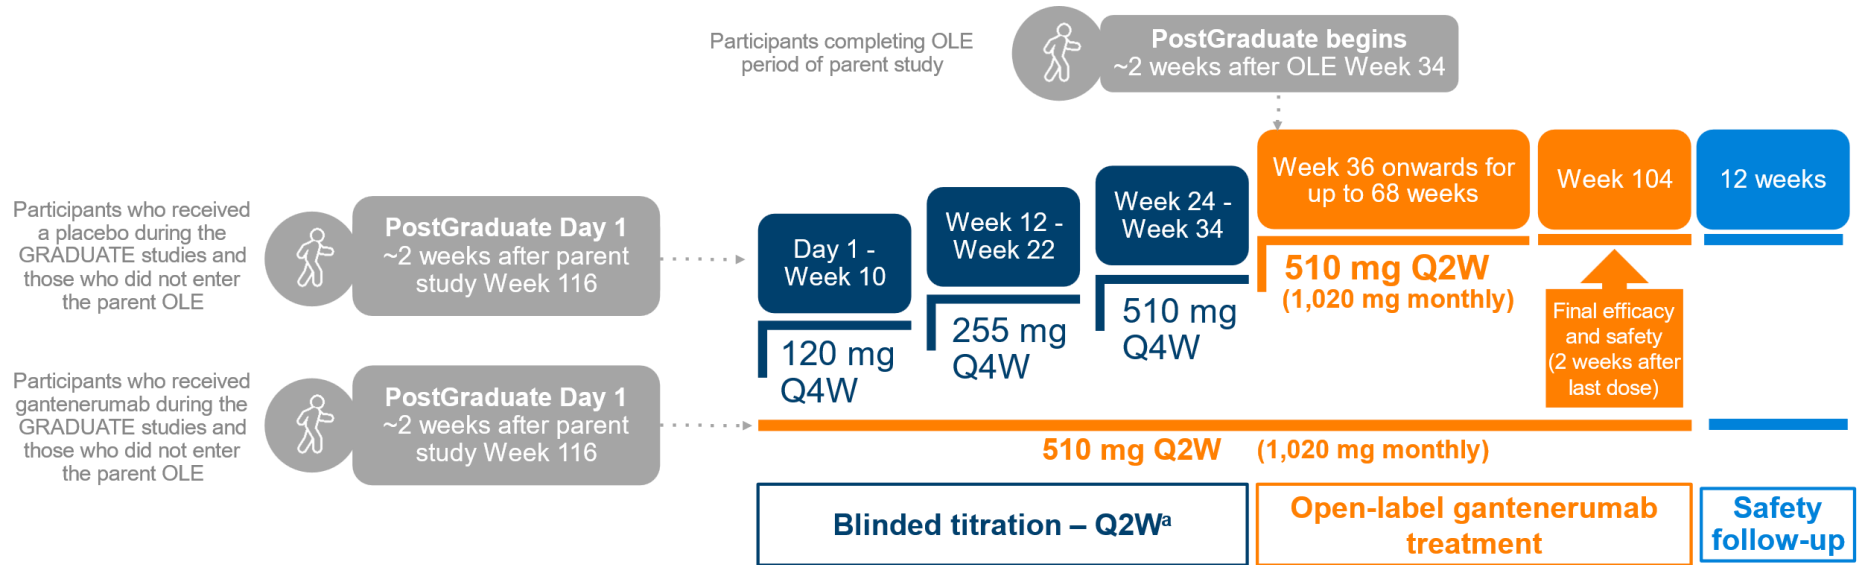

215

216 Abbreviations: OLE, open-label extension; Q2W, every 2 weeks; Q4W, every 4 weeks.

217 All participants had received Q2W injections during the uptitration to maintain the blind to the previous treatment allocation in the  
 218 parent studies.

219 For a small subset of participants for whom POSTGRADUATE was not available at the time of completion of the double-blind period  
 220 of the parent study, they entered an OLE period within the parent study. These participants joined the POSTGRADUATE study  
 221 approximately 2 weeks after OLE week 34, once they completed uptitration.

222 <sup>a</sup> Participants who received gantenerumab during the double-blind period continued to receive gantenerumab 510 mg Q2W while  
223 undergoing a mock uptitration. Participants who received placebo during the double-blind period had undergone an uptitration with  
224 gantenerumab.

225

226 **eFigure 3. PostGraduate: Participant Flow**

227

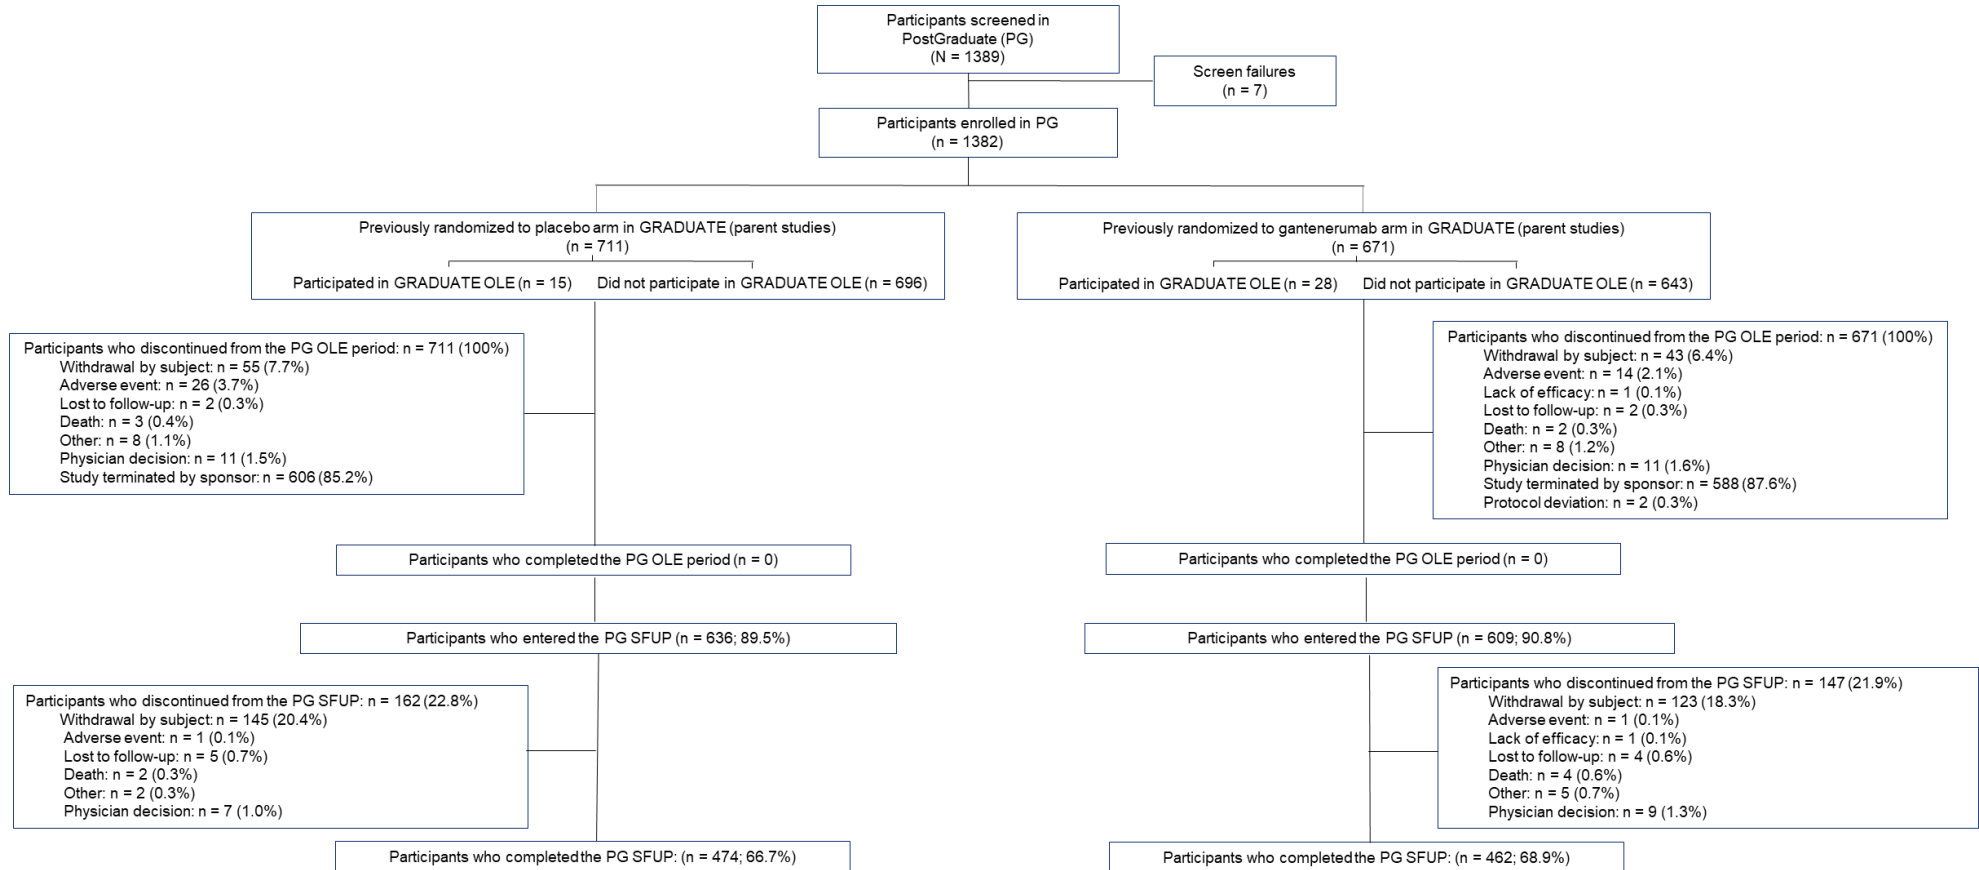

228

229

230 Abbreviations: DB, double-blind; OLE, open-label extension; PG, PostGraduate; SFUP, Safety Follow-up Period.

231 Any participant who had completed GRADUATE I or GRADUATE II, either the DB or OLE part, as applicable, and did not  
232 discontinue study drug early was eligible for enrollment in this study if they met the inclusion/exclusion criteria.  
233 Participants were enrolled at 270 sites from February 1, 2021 and the PostGraduate study was terminated March 6, 2023 after the  
234 GRADUATE studies did not meet their primary endpoint.<sup>1</sup>  
235



236 eFigure 4. Kaplan-Meier Plot of Time-to-Onset of First ARIA-E Event in the Double-Blind Period of GRADUATE Trials

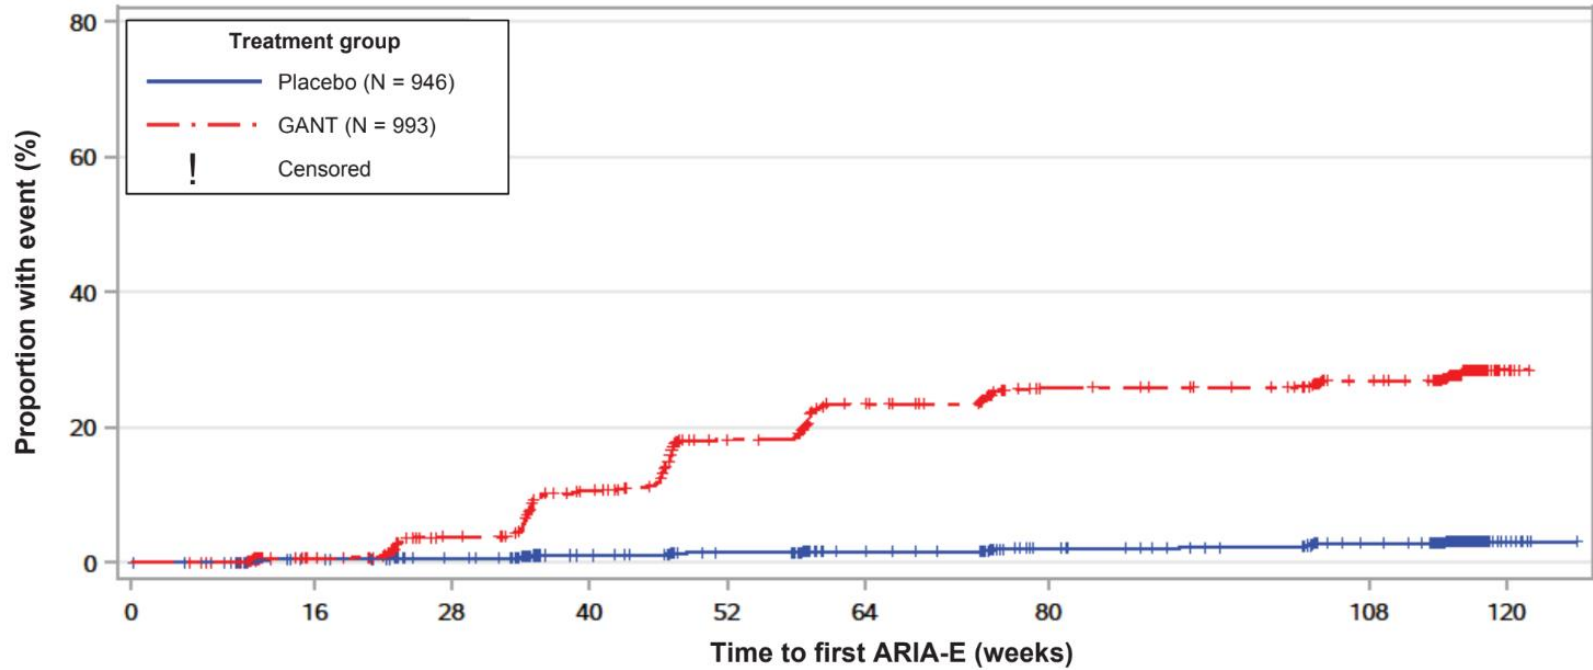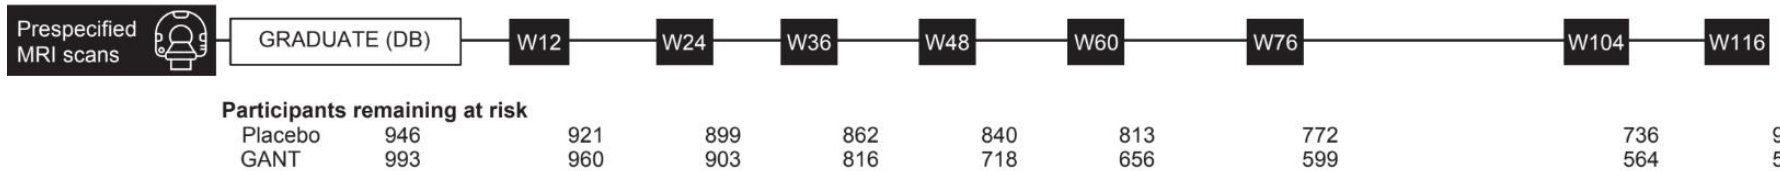

237  
 238 Abbreviations: ARIA-E, amyloid-related imaging abnormalities-edema; DB, double-blind; GANT, gantenerumab; W, weeks.

239 Solid boxes indicate prespecified MRI scanning timepoints for the GRADUATE studies.

240 eFigure 5. Kaplan-Meier Plot of Time-to-Onset of First ARIA-E Event from First Gantenerumab Dose in Double-Blind Period  
 241 of GRADUATE Including Open-Label Period and PostGraduate Data

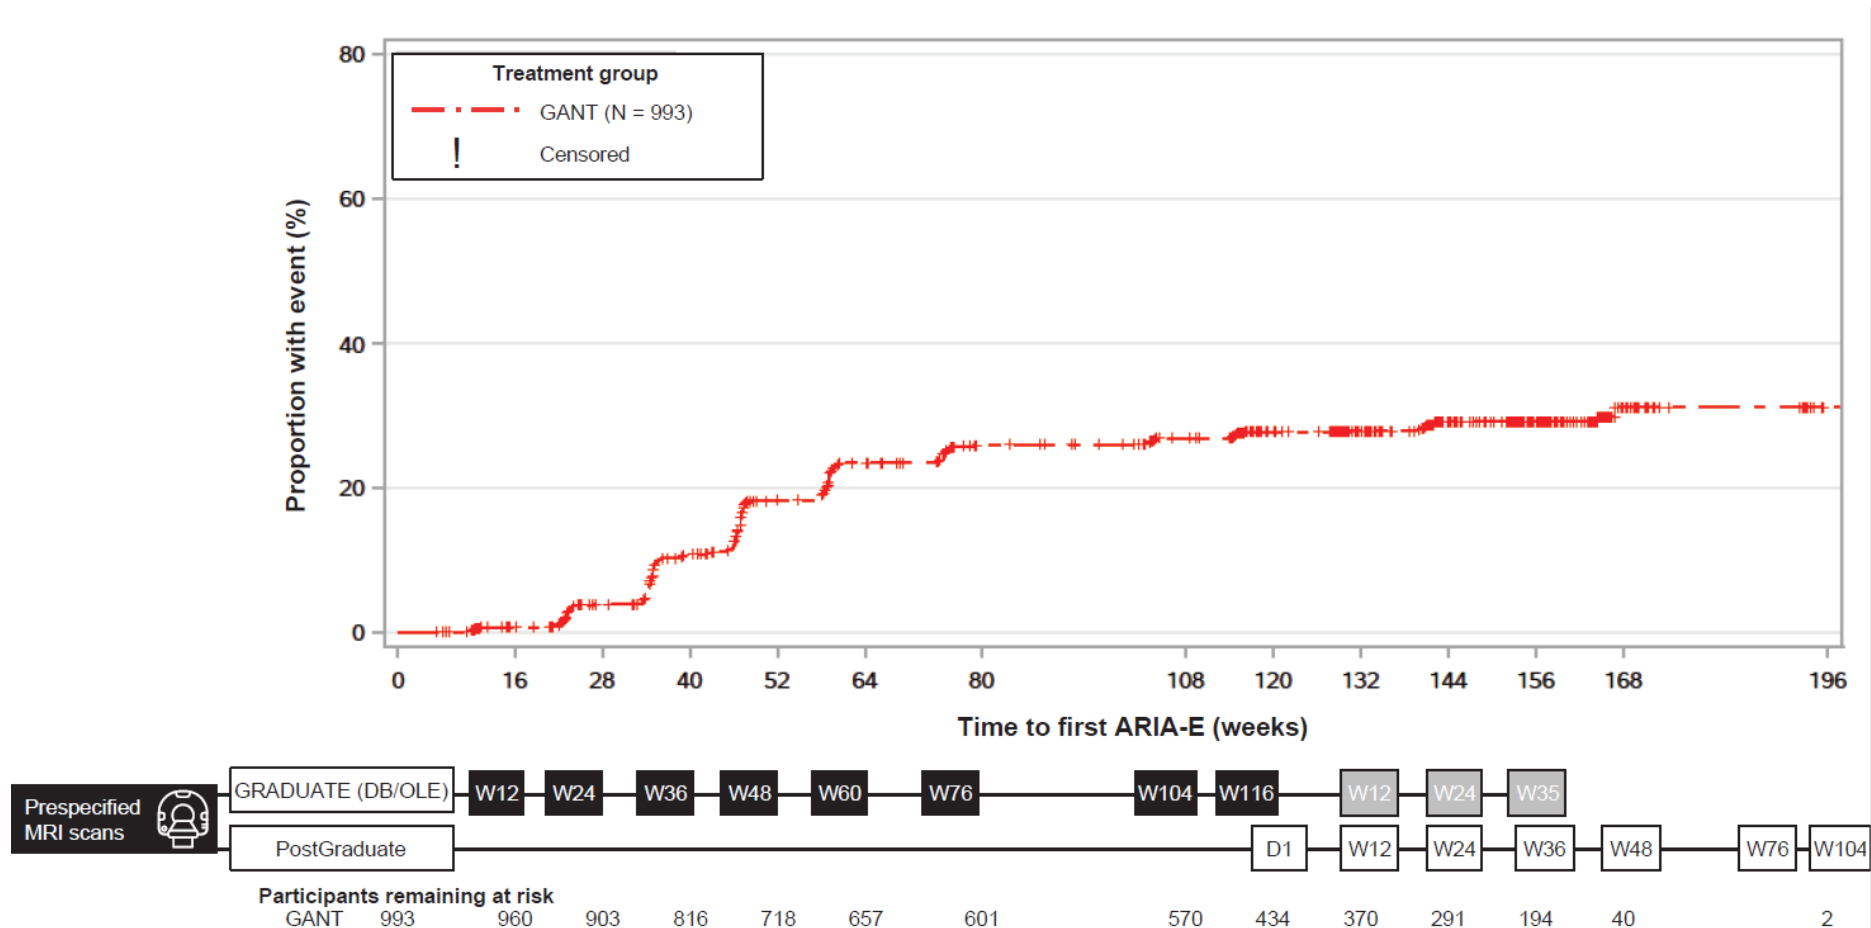

242  
 243 Abbreviations: ARIA-E, amyloid-related imaging abnormalities-edema; D, day; DBL, double-blind; GANT, gantenerumab; W, weeks.  
 244 Solid boxes indicate prespecified MRI scanning timepoints for the GRADUATE studies (black boxes, double-blind period; grey boxes, open-  
 245 label period); white boxes indicate MRI scanning timepoints for PostGraduate.

246 eFigure 6. Kaplan-Meier Plot of Time-to-Onset of First ARIA-E Event in the Double-Blind Period of GRADUATE Trials by  
 247 APOE ε4 Status

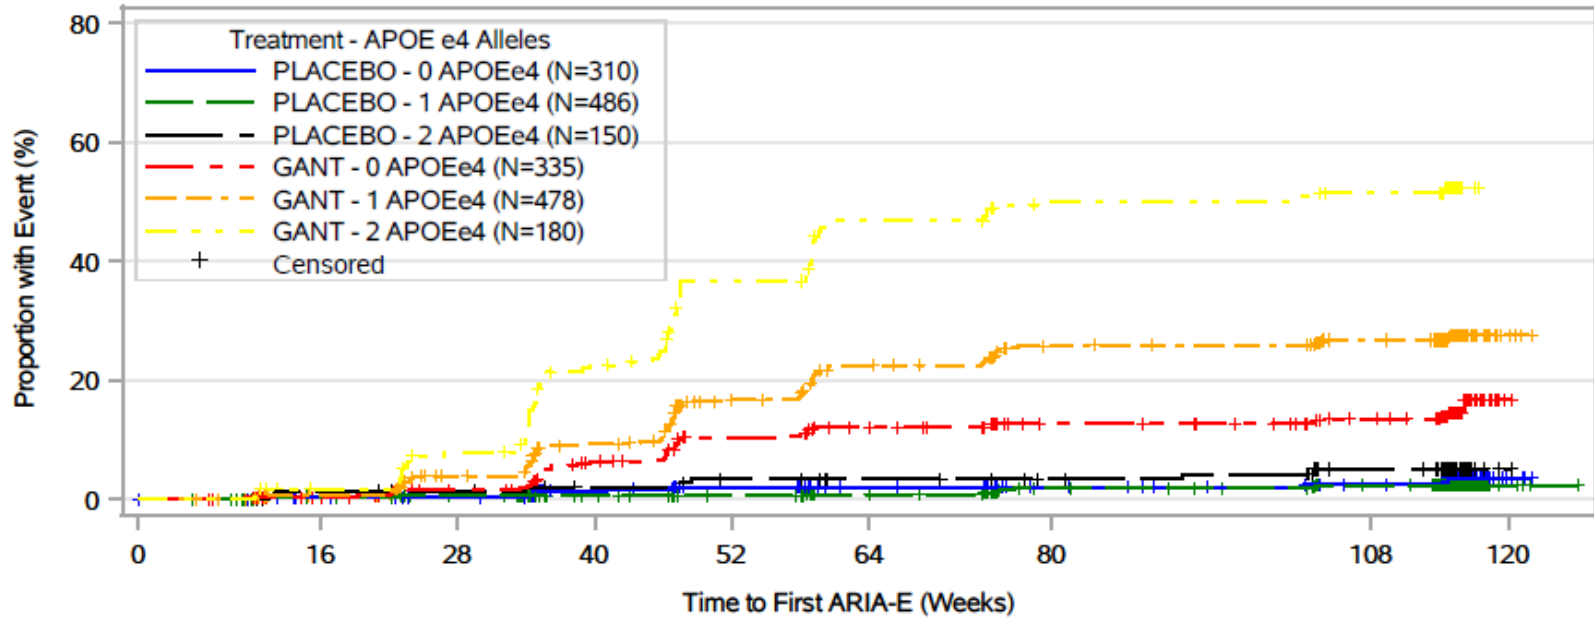

Participants remaining at risk

|                    |     |     |     |     |     |     |     |     |    |
|--------------------|-----|-----|-----|-----|-----|-----|-----|-----|----|
| PLACEBO - 0 APOEε4 | 310 | 300 | 291 | 277 | 269 | 259 | 244 | 234 | 4  |
| PLACEBO - 1 APOEε4 | 486 | 475 | 466 | 448 | 438 | 425 | 403 | 387 | 4  |
| PLACEBO - 2 APOEε4 | 150 | 146 | 142 | 137 | 133 | 129 | 125 | 115 | 1  |
| GANT - 0 APOEε4    | 335 | 324 | 310 | 287 | 266 | 254 | 234 | 219 | 1  |
| GANT - 1 APOEε4    | 478 | 463 | 433 | 398 | 350 | 319 | 293 | 277 | 4  |
| GANT - 2 APOEε4    | 180 | 173 | 160 | 131 | 102 | 83  | 72  | 68  | NE |

248

249 Abbreviations: APOE, apolipoprotein E; ARIA-E, amyloid-related imaging abnormalities – edema; GANT, gantenerumab; NE, not

250 evaluable.

251 **eFigure 7. Kaplan-Meier Plot of Time-to-Onset of First ARIA-E Event from First Gantenerumab Dose in Double-Blind Period**  
 252 **of GRADUATE Including Open-Label Period and PostGraduate Data by APOE ε4 Status**

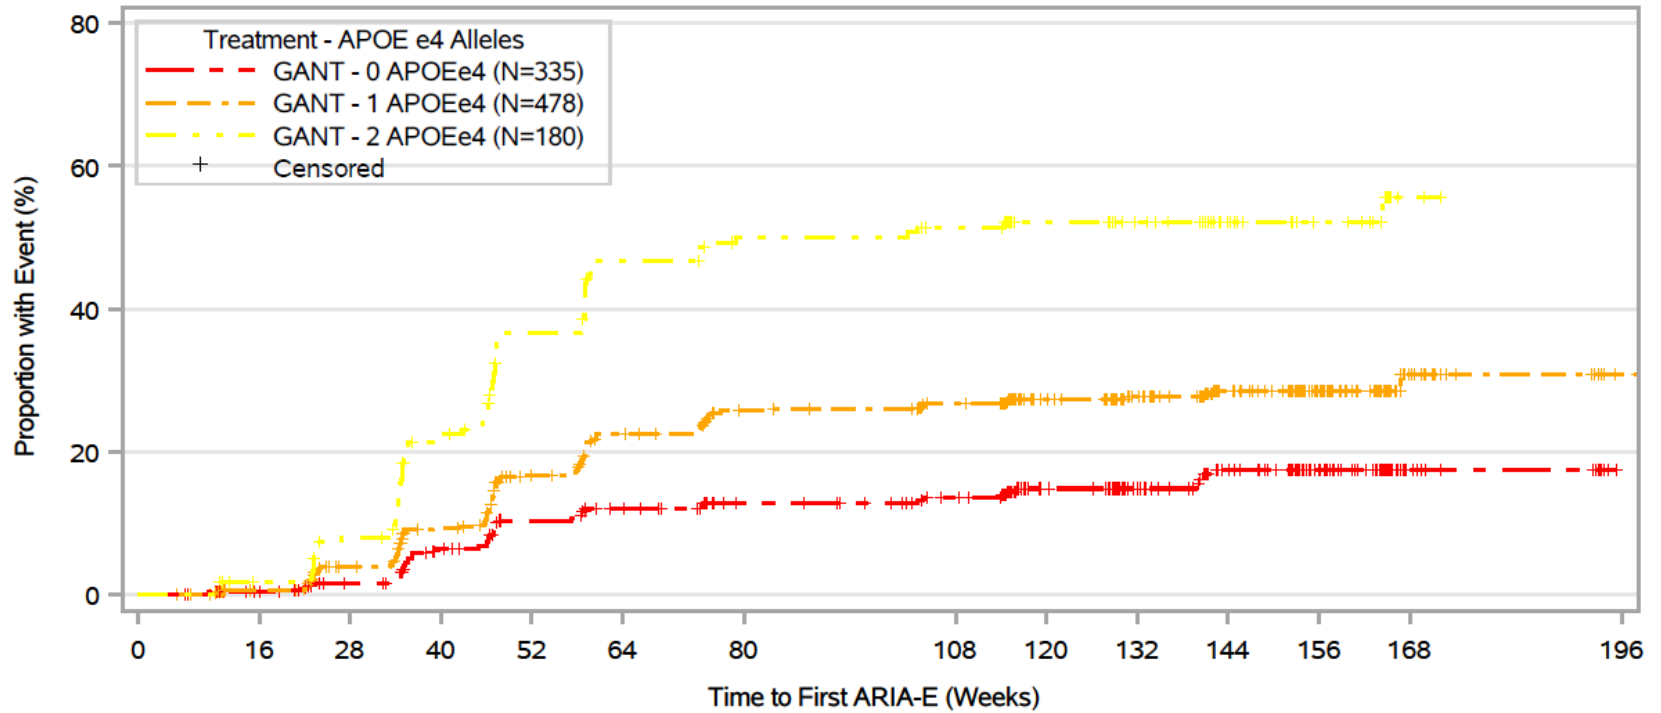

Participants remaining at risk

|                 |     |     |     |     |     |     |     |     |     |     |     |     |    |    |
|-----------------|-----|-----|-----|-----|-----|-----|-----|-----|-----|-----|-----|-----|----|----|
| GANT - 0 APOEε4 | 335 | 324 | 310 | 287 | 266 | 254 | 235 | 222 | 165 | 141 | 113 | 71  | 14 | NE |
| GANT - 1 APOEε4 | 478 | 463 | 433 | 398 | 350 | 319 | 293 | 279 | 223 | 190 | 151 | 104 | 24 | 2  |
| GANT - 2 APOEε4 | 180 | 173 | 160 | 131 | 102 | 84  | 73  | 69  | 46  | 39  | 27  | 19  | 2  | NE |

253

254 Abbreviations: APOE, apolipoprotein E; ARIA-E, amyloid-related imaging abnormalities – edema; GANT, gantenerumab; NE, not  
 255 evaluable.

256 **Supplementary Case Narratives. GRADUATE I and II: Serious Symptomatic**  
257 **ARIA-E Cases**

258 This section includes narratives for episodes of serious symptomatic ARIA-E (ie,  
259 where the ARIA-E and/or the CNS symptom temporally associated with the ARIA-E  
260 was reported as a serious adverse event [AE]) reported in GRADUATE I and II.  
261 Overall, 11 participants randomized to gantenerumab, and none of the participants  
262 randomized to placebo, experienced serious symptomatic ARIA-E. These narratives  
263 are provided to highlight the clinical presentations, associated imaging findings, and  
264 medical interventions applied to manage these cases. While the study protocols  
265 mandated study drug suspension for certain ARIA-E findings and permanent study  
266 drug discontinuation for exceeding certain cumulative ARIA-H counts (see  
267 Supplementary Figure 2), it did not mandate permanent study treatment  
268 discontinuation for ARIA-E unless the principal investigator (PI) considered it to be in  
269 the best interests of the participant; per the protocol, the study drug could be resumed  
270 following the resolution of ARIA-E radiological findings and any associated CNS  
271 symptoms. While the study protocol advised that in case of symptomatic ARIA-E, the  
272 use of intravenous (IV) corticosteroids may be considered, a specific regimen was not  
273 recommended and the specific steroid regimens used were as per the clinician's  
274 decision.

275

**Table A. Summary of the Serious Symptomatic ARIA-E Cases**

| Characteristic                                                                                           | Results                                                                                                                                                                                                                                                                                               |
|----------------------------------------------------------------------------------------------------------|-------------------------------------------------------------------------------------------------------------------------------------------------------------------------------------------------------------------------------------------------------------------------------------------------------|
| APOE ε4 status                                                                                           | Six noncarriers, two heterozygous carriers, three homozygous carriers                                                                                                                                                                                                                                 |
| Late onset, > week 52                                                                                    | Seven of 11 participants                                                                                                                                                                                                                                                                              |
| BGTS score > 20                                                                                          | Six of 11 participants                                                                                                                                                                                                                                                                                |
| Prominent (> 15 ARIA-H or > 2 SS cumulatively) concurrent new ARIA-H                                     | Seven of 11 participants                                                                                                                                                                                                                                                                              |
| Nonserious (asymptomatic or symptomatic) ARIA-E episodes prior to the serious symptomatic ARIA-E episode | Five of 11 participants                                                                                                                                                                                                                                                                               |
| Lag between ARIA-E detection and symptoms                                                                | Four of 11 participants (4 days, 10 days, approximately 2 weeks, approximately 7 weeks)                                                                                                                                                                                                               |
| Fatal outcome                                                                                            | None                                                                                                                                                                                                                                                                                                  |
| Hospitalizations                                                                                         | 10 of 11 participants; three with rehospitalization, of whom one rehospitalized twice                                                                                                                                                                                                                 |
| Restart of study drug                                                                                    | Five of 11 participants; in one case, recurrence of serious ARIA-E on restarting treatment                                                                                                                                                                                                            |
| Treatment with steroids                                                                                  | Eight of 11 participants                                                                                                                                                                                                                                                                              |
| Presentation with focal symptoms as described in the case narratives                                     | Four of 11 participants; none received thrombolytics                                                                                                                                                                                                                                                  |
| Seizures reported as AEs                                                                                 | Two of 11 participants: Case 5: numerous seizures (reported as focal dyscognitive seizures) and treatment with multiple anticonvulsants. Case 11: Status epilepticus with 8-point MMSE decline from baseline at early termination visit that improved to a 2-point decline from baseline at week 116. |
| Additional instances of potential seizure activity as described in the case narratives                   | Three of 11 participants: Cases 6 and 7: possible seizures treated with anticonvulsants. Case 8: seizure-like episodes.                                                                                                                                                                               |

|                                                                           |                                                                                                                                                                                                                                                                                                      |
|---------------------------------------------------------------------------|------------------------------------------------------------------------------------------------------------------------------------------------------------------------------------------------------------------------------------------------------------------------------------------------------|
| Clinical course as described in the case narratives                       | Fluctuating in 3 of 11 participants                                                                                                                                                                                                                                                                  |
| Residual symptoms considered potential sequelae according to investigator | One of 11 participants (significant decline in final MMSE, residual significant decline in ADL following ARIA-E and seizure resolution was considered by the investigator as a potential ARIA-E sequelae, albeit confounded by significant MMSE decline trajectory that started before ARIA-E onset) |

277

278 Abbreviations: ADL, Activities of Daily Living; AE, adverse event; APOE,  
 279 apolipoprotein E; ARIA-E, amyloid-related imaging abnormalities – edema; ARIA-H,  
 280 amyloid-related imaging abnormalities – hemosiderosis; BGTS, Barkhof Grand Total  
 281 Scale; MMSE, Mini-Mental State Examination.

282

283 **Table B. Summary of the Serious Symptomatic ARIA-E Cases by Maximum**  
 284 **ARIA-E Severity**

| <b>Maximum ARIA-E severity (BGTS)</b> | <b>Number of SS cumulatively upon ARIA-E resolution*</b> | <b>Number of ARIA-H (microhemorrhages and SS) cumulatively upon ARIA-E resolution*</b> |
|---------------------------------------|----------------------------------------------------------|----------------------------------------------------------------------------------------|
| 3                                     | 0                                                        | 0                                                                                      |
| 11                                    | 0                                                        | 0                                                                                      |
| 11                                    | 0                                                        | 0                                                                                      |
| 14                                    | 3                                                        | 12                                                                                     |
| 15                                    | 0                                                        | 1                                                                                      |
| 20                                    | 4                                                        | 45                                                                                     |
| 22                                    | 3                                                        | 6                                                                                      |
| 23                                    | 1                                                        | 19                                                                                     |
| 26                                    | 5                                                        | 44                                                                                     |
| 31                                    | 6                                                        | 28                                                                                     |
| 34 (1st episode)                      | 0                                                        | 8                                                                                      |
| 27 (2nd episode)                      | 0                                                        | 17                                                                                     |

285

286 Abbreviations: ARIA-E, amyloid-related imaging abnormalities – edema; ARIA-H,  
 287 amyloid-related imaging abnormalities – hemosiderosis; BGTS, Barkhof Grand Total  
 288 Scale; MRI, magnetic resonance imaging; SS, superficial siderosis.

289 \*Cumulative count on the MRI scan that showed radiographic ARIA-E resolution.

290



291 **Case 1**

292 This 65-year-old White female with prodromal AD had an MMSE score at baseline of  
293 21, was a heterozygous APOE  $\epsilon$ 4 carrier, and had hyperlipidemia. The screening MRI  
294 had no microhemorrhages or SS, and Fazekas score was 1. She was taking donepezil.  
295 She was not on any antiplatelets or anticoagulants.

296 Prior to the serious symptomatic ARIA-E event, she had two asymptomatic ARIA-E  
297 episodes, first from study week 24 to week 52 after three doses of 255 mg Q4W  
298 gantenerumab, with dosing suspension, with a maximum BGTS of 15, and, following  
299 dose resumption, from week 76 to week 100 after one dose of 255 mg and four doses  
300 of 510 mg Q4W gantenerumab, with dosing suspension, with a maximum BGTS of 11.

301 Following gantenerumab dosing resumption, seven gantenerumab doses were  
302 administered, including six at the target dose level (510 mg Q2W) prior to the serious  
303 symptomatic ARIA-E. Four days after the most recent gantenerumab dose, the  
304 scheduled week 116 MRI showed new ARIA-E (BGTS of 15) in the left frontal, left  
305 temporal, left parietal, and bilateral occipital regions, without new ARIA-H (see Figure  
306 1 below).

307 The same day, the participant developed right-sided weakness, dysarthria, and  
308 dizziness. Five days later, she presented with these symptoms to the emergency room  
309 and was hospitalized. No treatment was given for these events. No further study drug  
310 was administered as per the protocol ARIA-E rules, and because the double-blind  
311 dosing period was complete. The participant was discharged after 9 days. The ARIA-  
312 E symptoms resolved 8 weeks after onset, although the ARIA-E was still present  
313 radiologically (BGTS of 12). However, 3 days later, the participant experienced  
314 moderate myoclonus of the right hand, for which she was subsequently re-

315 hospitalized. An MRI scan was repeated locally and reported to be “stable.” The next  
316 day (6 days after onset), the myoclonus was considered resolved and the participant  
317 was discharged from the hospital without any symptoms. The participant declined  
318 further follow-up MRI and therefore the ARIA-E was ongoing at the time that she  
319 discontinued from the study. Her last measured MMSE score, at week 116, while the  
320 ARIA-E was ongoing, was 14 (7 points lower than baseline and 5 points lower than  
321 that at week 76).

322 The participant’s MRI findings of ARIA observed during the double-blind treatment  
323 period of the study are presented below.

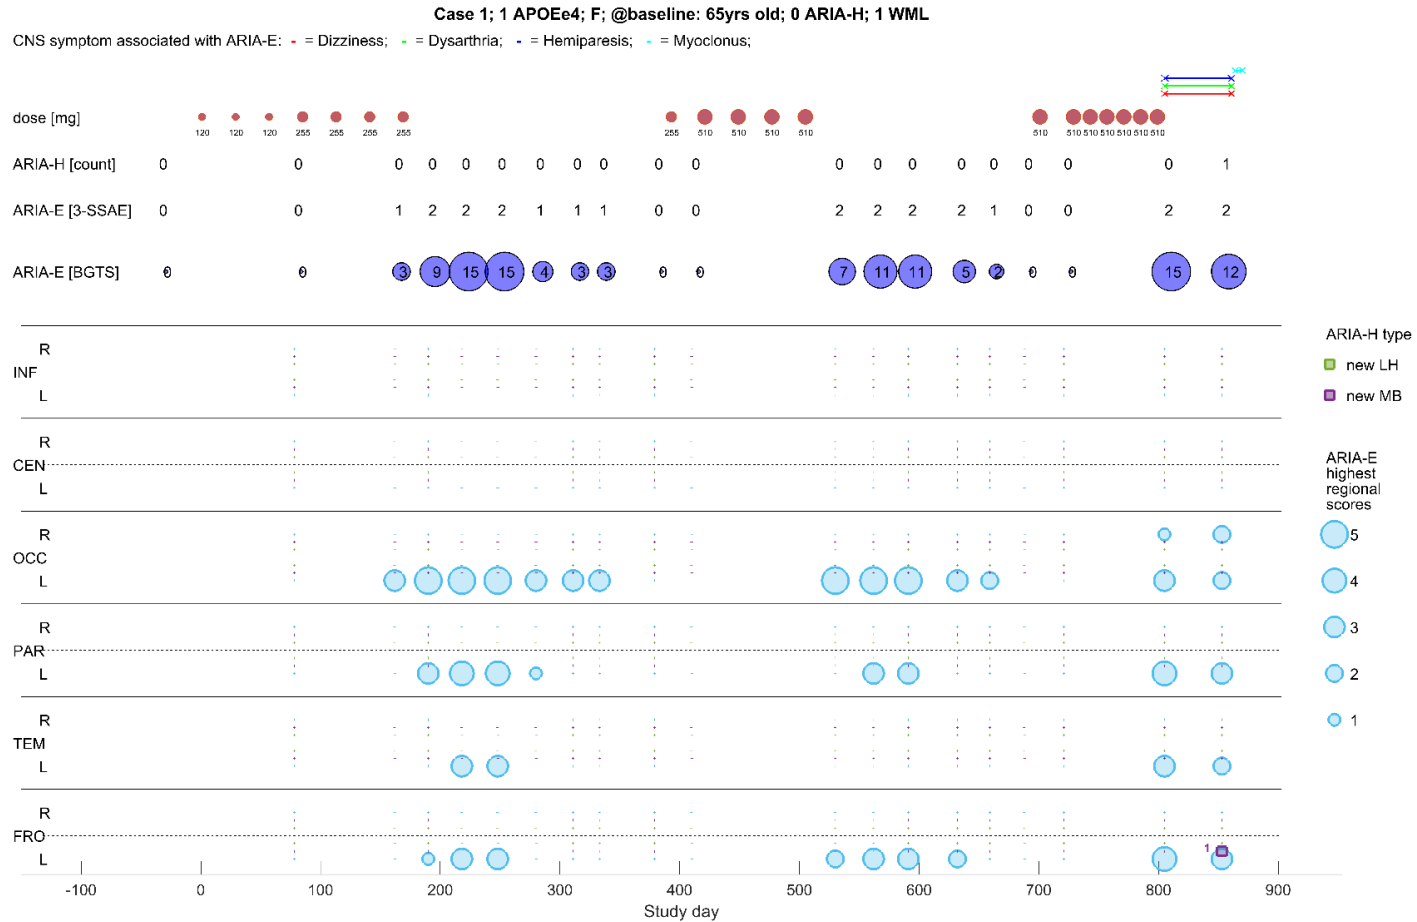

324

325 Abbreviations: 3-SSAE, 3-point Severity Scale of ARIA-E; APOE, apolipoprotein E; ARIA-E, amyloid-related imaging abnormalities  
 326 – edema; ARIA-H, amyloid-related imaging abnormalities – hemosiderosis; BGTS, Barkhof Grand Total Scale; CEN, central region;  
 327 CNS, central nervous system; FRO, frontal lobe; INF, infratentorial region – on each side of the brain; L, left hemisphere; LH,

328 leptomeningeal hemosiderosis; MB, microbleed; MRI, magnetic resonance imaging; OCC, occipital lobe; PAR, parietal lobe; R,  
329 right hemisphere; TEM, temporal lobe; WML, white matter lesion.

330 Individual-level ARIA map. The overall radiological severity of ARIA-E is given by the BGTS, which can take values between 0 and  
331 60 and is obtained by summing the highest regional ARIA-E scores across 12 brain regions (FRO, TEM, PAR, OCC, CEN, INF, L,  
332 R). The regional ARIA-E scores can take values between 0 and 5. The radiological severity of ARIA-E is rated also with the 3-  
333 SSAE-. The radiological severity of ARIA-H is assessed across the same 12 brain regions as ARIA-E and is given by “ARIA-H  
334 [count],” the total cumulative number of brain bleeds, which can be of two types, eg, MB and LH. “ARIA-H [count]” at a given MRI  
335 visit is the sum between the number of new ARIA-H at that visit and old ARIA-H from all previous MRI visits. The square symbols  
336 illustrate only the new ARIA-H at a given MRI visit. The increase in the size of symbols represents an increase in magnitude.

337 **Case 2**

338 This 70-year-old White female with prodromal AD had an MMSE score at baseline of  
339 28, was a non-carrier of APOE  $\epsilon$ 4, and had hypertension. The screening MRI showed  
340 no microhemorrhages or SS, and Fazekas score was 1. She was not on symptomatic  
341 AD medication, antiplatelets, or anticoagulants

342 The Week 24 MRI showed one new microhemorrhage in the left occipital region after  
343 three doses of 255 mg Q4W gantenerumab. The Week 28 MRI showed one additional  
344 microhemorrhage, in the left frontal region, after the fourth 255 mg dose. She received  
345 the first dose of 510 mg Q4W gantenerumab at study week 36. Her most recent MMSE  
346 score, at week 24, was 28. A week 40 MRI scan showed new ARIA-E findings (BGTS  
347 of 8) in the left temporal, left parietal, and left occipital regions. It also showed five new  
348 microhemorrhages in the left occipital region (cumulative ARIA-H count of 7).

349 Owing to the BGTS  $\geq$  4, treatment with gantenerumab was temporarily interrupted.  
350 Per PI decision, she was hospitalized for further examinations, and received IV  
351 methylprednisolone 500 mg once per day (QD) for 5 days for the ARIA-E, with  
352 subsequent oral tapering using prednisolone over approximately 6 weeks. An  
353 electroencephalogram (EEG) performed during admission was normal. She remained  
354 asymptomatic throughout the episode and was discharged from the hospital 1 week  
355 after admission. The ARIA-E resolved at week 48 and gantenerumab dosing was  
356 resumed.

357 She subsequently had an asymptomatic ARIA-E episode from study week 52 to week  
358 68 following one dose of 255 mg Q4W, with a maximum BGTS severity of 10 and  
359 dosing suspension.

360 Following gantenerumab dosing resumption, five gantenerumab doses, including four  
361 at target level (510 mg Q2W) prior to the serious symptomatic ARIA-E were  
362 administered, with the most recent at week 78. A week 80 MRI scan showed new  
363 ARIA-E (BGTS of 14) in the bilateral occipital, bilateral temporal, and right parietal  
364 regions.

365 Approximately 2 weeks later, the participant experienced a severe headache. She  
366 received treatment with ibuprofen and felt partial relief from the headache. A day later,  
367 she developed a confusional state. A brain computed tomography (CT) scan showed  
368 diffuse occipital, parietal, and posterior frontal hypointensities with no hemorrhages.  
369 An EEG showed diffuse alteration of background activity and posterior focal slowing  
370 with no epileptiform discharges. She was diagnosed with severe encephalopathy,  
371 leading to hospitalization. She was treated with methylprednisolone 1 g QD for 5 days  
372 and subsequently switched to a tapering prednisolone dose, starting at 75 mg QD.  
373 The encephalopathy resolved approximately 2 weeks after onset, and the participant  
374 was discharged. Owing to the ARIA-E and encephalopathy, treatment with blinded  
375 study drug was permanently discontinued per the Investigator's decision.

376 Two weeks after the encephalopathy resolved, an early termination visit MRI scan  
377 showed one new area of SS in the right parietal region and two new microhemorrhages  
378 in the right temporal region (cumulative ARIA-H count of 12, including three focal areas  
379 of SS). Six weeks after that, the ARIA-E resolved. Her last measured MMSE score, at  
380 week 116, was 29 (1 point higher than baseline).

381 MRI findings of ARIA observed during the double-blind treatment period of the study  
382 are presented below.

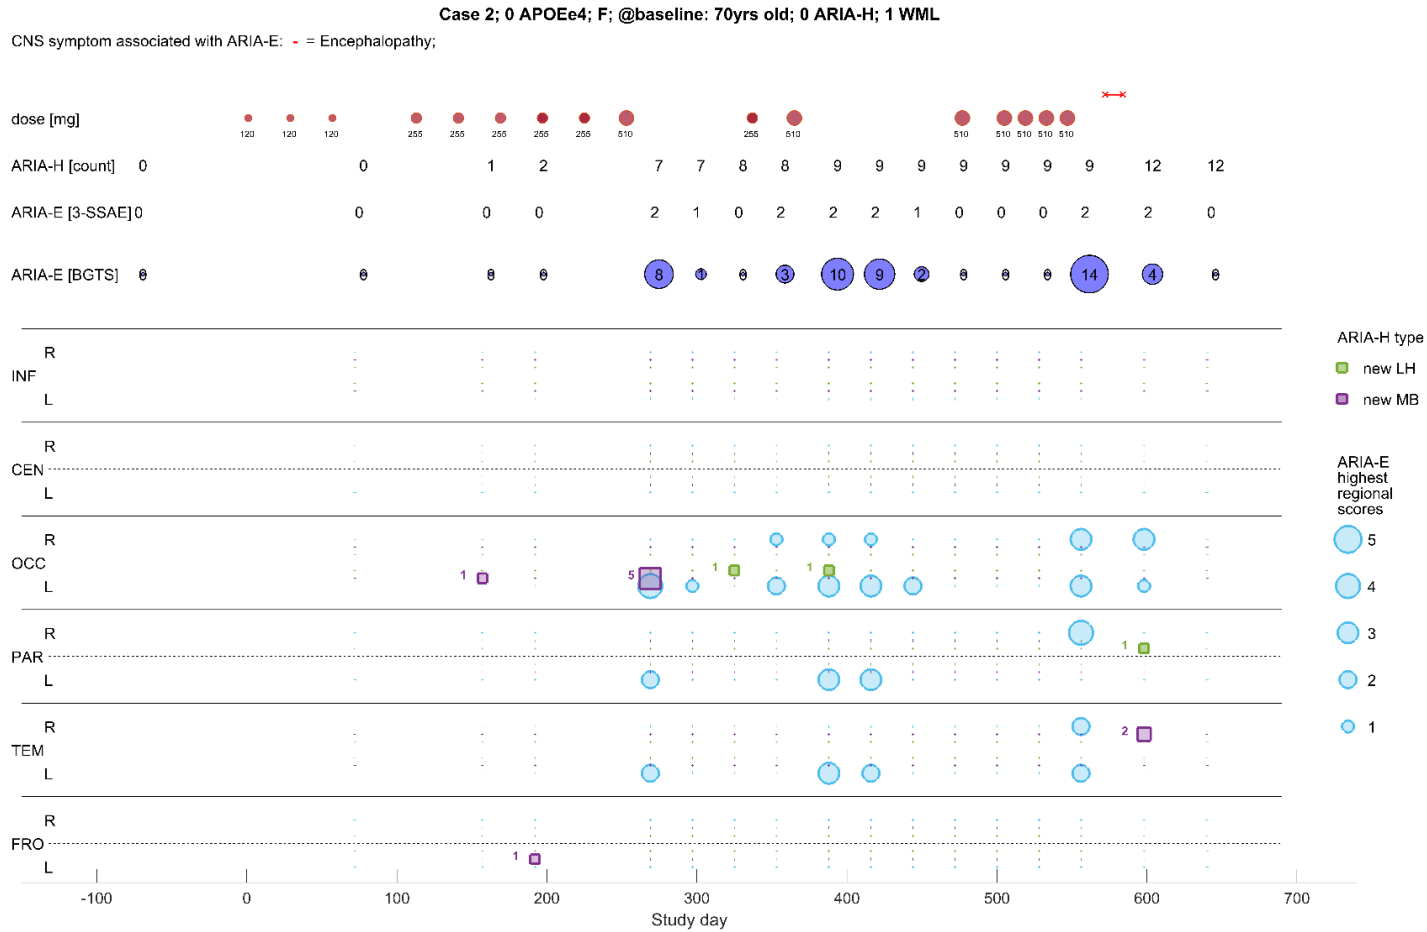

383

384 Abbreviations: 3-SSAE, 3-point Severity Scale of ARIA-E; APOE, apolipoprotein E; ARIA-E, amyloid-related imaging abnormalities  
 385 – edema; ARIA-H, amyloid-related imaging abnormalities – hemosiderosis; BGTS, Barkhof Grand Total Scale; CEN, central region;

386 CNS, central nervous system; FRO, frontal lobe; INF, infratentorial region – on each side of the brain; L, left hemisphere; LH,  
387 leptomeningeal hemosiderosis; MB, microbleed; MRI, magnetic resonance imaging; OCC, occipital lobe; PAR, parietal lobe; R,  
388 right hemisphere; TEM, temporal lobe; WML, white matter lesion.

389 Individual-level ARIA map. The overall radiological severity of ARIA-E is given by the BGTS, which can take values between 0 and  
390 60 and is obtained by summing the highest regional ARIA-E scores across 12 brain regions (FRO, TEM, PAR, OCC, CEN, INF, L,  
391 R). The regional ARIA-E scores can take values between 0 and 5. The radiological severity of ARIA-E is rated also with the 3-  
392 SSAE The radiological severity of ARIA-H is assessed across the same 12 brain regions as ARIA-E and is given by “ARIA-H  
393 [count],” the total cumulative number of brain bleeds, which can be of two types, eg., MB and LH. “ARIA-H [count]” at a given MRI  
394 visit is the sum between the number of new ARIA-H at that visit and old ARIA-H from all previous MRI visits. The square symbols  
395 illustrate only the new ARIA-H at a given MRI visit. The increase in the size of symbols represents an increase in magnitude.



396 **Case 3**

397 This 79-year-old White female with prodromal AD had an MMSE score at baseline of  
398 20, was a non-carrier of APOE  $\epsilon$ 4, and had hypercholesterolemia. The screening MRI  
399 showed no microhemorrhages or SS, and Fazekas score was 0. She was not on  
400 symptomatic AD medication, antiplatelets, or anticoagulants.

401 At week 52, her MMSE score was 22. At week 56, hours from the administration of the  
402 seventh target gantenerumab dose (510 mg Q2W subcutaneous [SC]), the participant  
403 experienced headache, nausea, vomiting, confusional state, psychomotor retardation,  
404 aphasia, and ipsilateral right hemianopia (the latter two severe), and was hospitalized.  
405 A CT scan showed hypodensity and loss of left temporoparietal cortico-subcortical  
406 differentiation with mass effect on the occipital lobe of the ipsilateral left ventricle and  
407 obliteration of adjacent convexity grooves, without objective pathological uptake of IV  
408 contrast. The radiology report stated findings were suggestive of acute ischemic injury  
409 in the territory supplied by posterior branches of the left middle cerebral artery. As the  
410 treating physician's diagnosis was ARIA-E, the participant received treatment with  
411 dexamethasone 18 mg daily, which was subsequently tapered. No thrombolytic was  
412 given. ARIA-E was subsequently (3 weeks later) confirmed on a per-protocol week 60  
413 MRI scan in the left temporal, left parietal, and left occipital area (BGTS of 11). Study  
414 drug dosing was interrupted due to the symptomatic ARIA-E.

415 While in hospital, 1 day after admission, the participant experienced elevated blood  
416 pressure of 180/75 mmHg, reported by the investigator as a hypertensive crisis, which  
417 prolonged her hospitalization. The investigator considered the hypertensive episode  
418 to be related to the blinded study drug. She received treatment with amlodipine and

419 losartan. On the same day, the events of nausea and vomiting were considered  
420 resolved.

421 Five days later, the hemianopia was considered resolved. After a further 5 days, the  
422 hypertensive episode was considered resolved and the participant was discharged.  
423 After a further 3 days, the aphasia was also considered resolved. Approximately  
424 2 weeks after that, the headache was considered resolved. After an additional  
425 3 weeks, the confusional state and psychomotor retardation were also considered  
426 resolved. On the same day, a week 64 MRI scan revealed no ARIA-E findings, leading  
427 to gantenerumab resumption at week 66 for three further doses of 255 mg Q2W,  
428 without ARIA-E recurrence. Her last measured MMSE score, at the early termination  
429 visit, was 19 (1 point lower than baseline).

430 MRI findings of ARIA observed during the double-blind treatment period of the study  
431 are presented below.

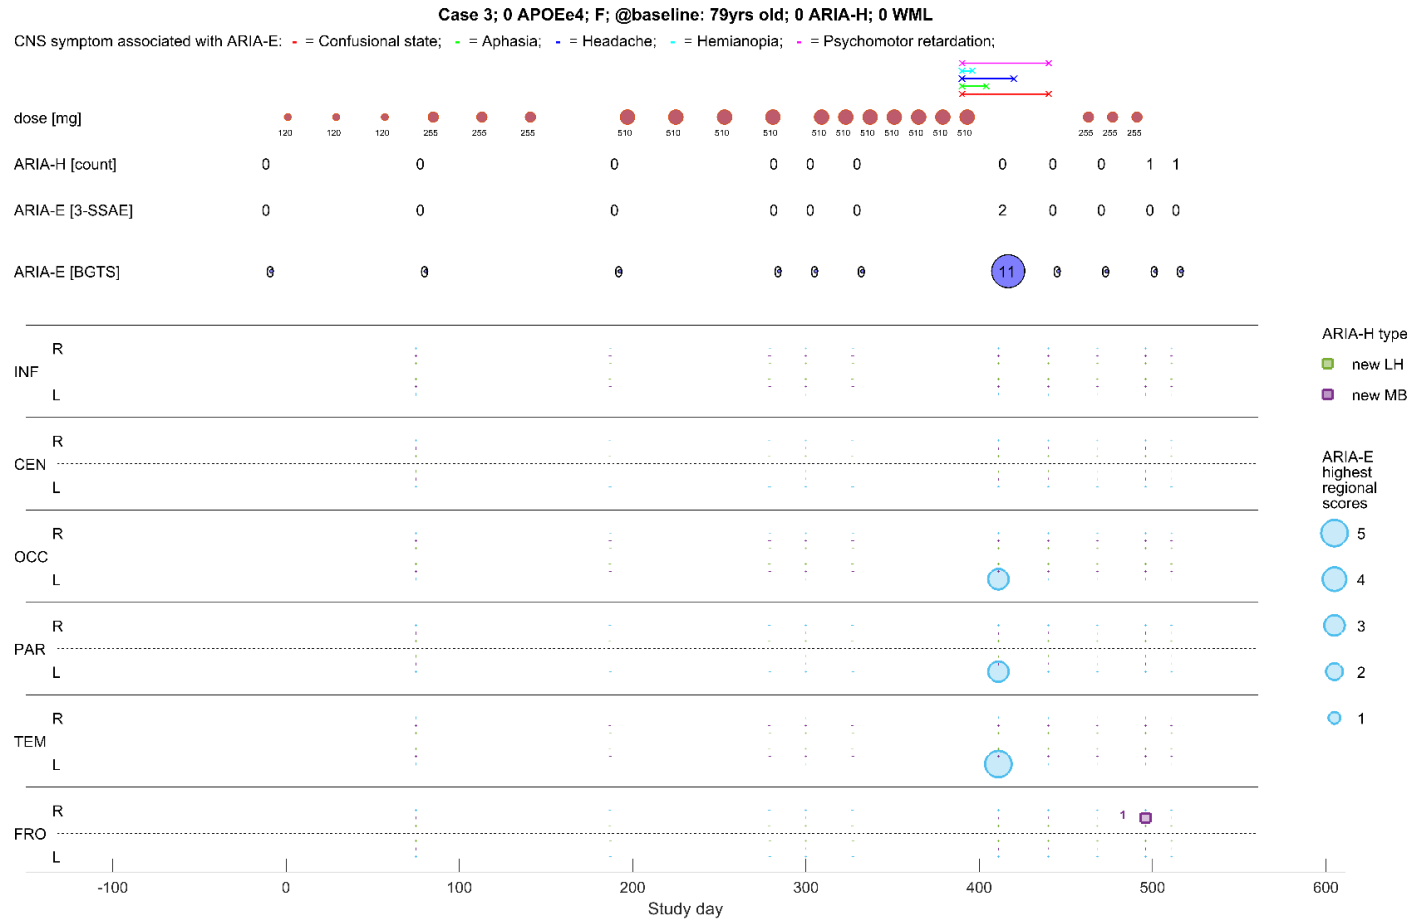

432

433 Abbreviations: 3-SSAE, 3-point Severity Scale of ARIA-E; APOE, apolipoprotein E; ARIA-E, amyloid-related imaging abnormalities  
 434 – edema; ARIA-H, amyloid-related imaging abnormalities – hemosiderosis; BGTS, Barkhof Grand Total Scale; CEN, central region;  
 435 CNS, central nervous system; FRO, frontal lobe; INF, infratentorial region – on each side of the brain; L, left hemisphere; LH,

436 leptomeningeal hemosiderosis; MB, microbleed; MRI, magnetic resonance imaging; OCC, occipital lobe; PAR, parietal lobe; R,  
437 right hemisphere; TEM, temporal lobe; WML, white matter lesion.

438 Individual-level ARIA map. The overall radiological severity of ARIA-E is given by the BGTS, which can take values between 0 and  
439 60 and is obtained by summing the highest regional ARIA-E scores across 12 brain regions (FRO, TEM, PAR, OCC, CEN, INF, L,  
440 R). The regional ARIA-E scores can take values between 0 and 5. The radiological severity of ARIA-E is rated also with the 3-  
441 SSAE The radiological severity of ARIA-H is assessed across the same 12 brain regions as ARIA-E and is given by “ARIA-H  
442 [count],” the total cumulative number of brain bleeds, which can be of two types, eg, MB and LH. “ARIA-H [count]” at a given MRI  
443 visit is the sum between the number of new ARIA-H at that visit and old ARIA-H from all previous MRI visits. The square symbols  
444 illustrate only the new ARIA-H at a given MRI visit. The increase in the size of symbols represents an increase in magnitude.

445 **Case 4**

446 This 76-year-old White female with prodromal AD had an MMSE score at baseline of  
447 21, was a non-carrier of APOE  $\epsilon$ 4, and had a history of transient ischemic attack,  
448 increased blood cholesterol, being overweight, tension headache, and migraine. The  
449 screening MRI did not show microhemorrhages or SS, and Fazekas score was 1. She  
450 was not on symptomatic AD medication. She received an antiplatelet (acetylsalicylic  
451 acid 81 mg QD) but not an anticoagulant.

452 Prior to the serious symptomatic ARIA-E event, she had two ARIA-E episodes; first,  
453 non-serious symptomatic (migraine) from study week 12 to week 24 following three  
454 doses of 120 mg Q4W gantenerumab, with a maximum BGTS of 3 and continuation  
455 of study drug, and second, asymptomatic from week 48 to week 56 following three  
456 doses of 510 mg Q4W gantenerumab, with a maximum BGTS of 3 and continuation  
457 of study drug.

458 Her MMSE score measured at week 52 was 22. At week 72, she received the 9th  
459 target dose of 510 mg Q2W gantenerumab. Ten days later, the participant  
460 experienced intermittent dizziness and lightheadedness while walking and being  
461 upright but not in the supine or sitting positions. It was also reported that her voice had  
462 been hoarse. Vital signs showed blood pressure 130/70 mmHg, with no postural drop.  
463 On the same day, she was diagnosed with severe vestibular disorder. Five days later,  
464 a CT scan was negative for acute findings; it, however, showed moderate chronic  
465 small vessel disease. A non-study MRI scan on the same day showed mild global  
466 parenchymal loss and extensive white matter hyperintensity, and right occipital  
467 encephalomalacia. On the same day, the participant was hospitalized. She received  
468 treatment with meclizine for the vestibular disorder. Labyrinthitis secondary to a recent

469 ear lavage for excessive cerumen was suspected. A day after admission, symptoms  
470 improved, and she was discharged. Approximately 2 weeks after hospital discharge,  
471 the scheduled week 76 MRI scan showed new ARIA-E (BGTS of 3) in the right occipital  
472 region.

473 The investigator considered the vestibular dysfunction to be related to blinded study  
474 drug and ear lavage for excessive cerumen. Subsequently, the scheduled week 80  
475 MRI scan showed radiological resolution of the ARIA-E. Owing to the ARIA-E and  
476 vestibular dysfunction, treatment with gantenerumab was suspended after week 72  
477 and the next dose was given at week 82.

478 Approximately 14 weeks after the ARIA-E resolved, the participant started ambulating  
479 with a cane to minimize fall risk. Four weeks later, vestibular disorder was considered  
480 resolved when cane use was no longer necessary. Her last measured MMSE score,  
481 at week 116, was 21 (no change since baseline).

482 MRI findings of ARIA observed during the double-blind treatment period of the study  
483 are presented below.

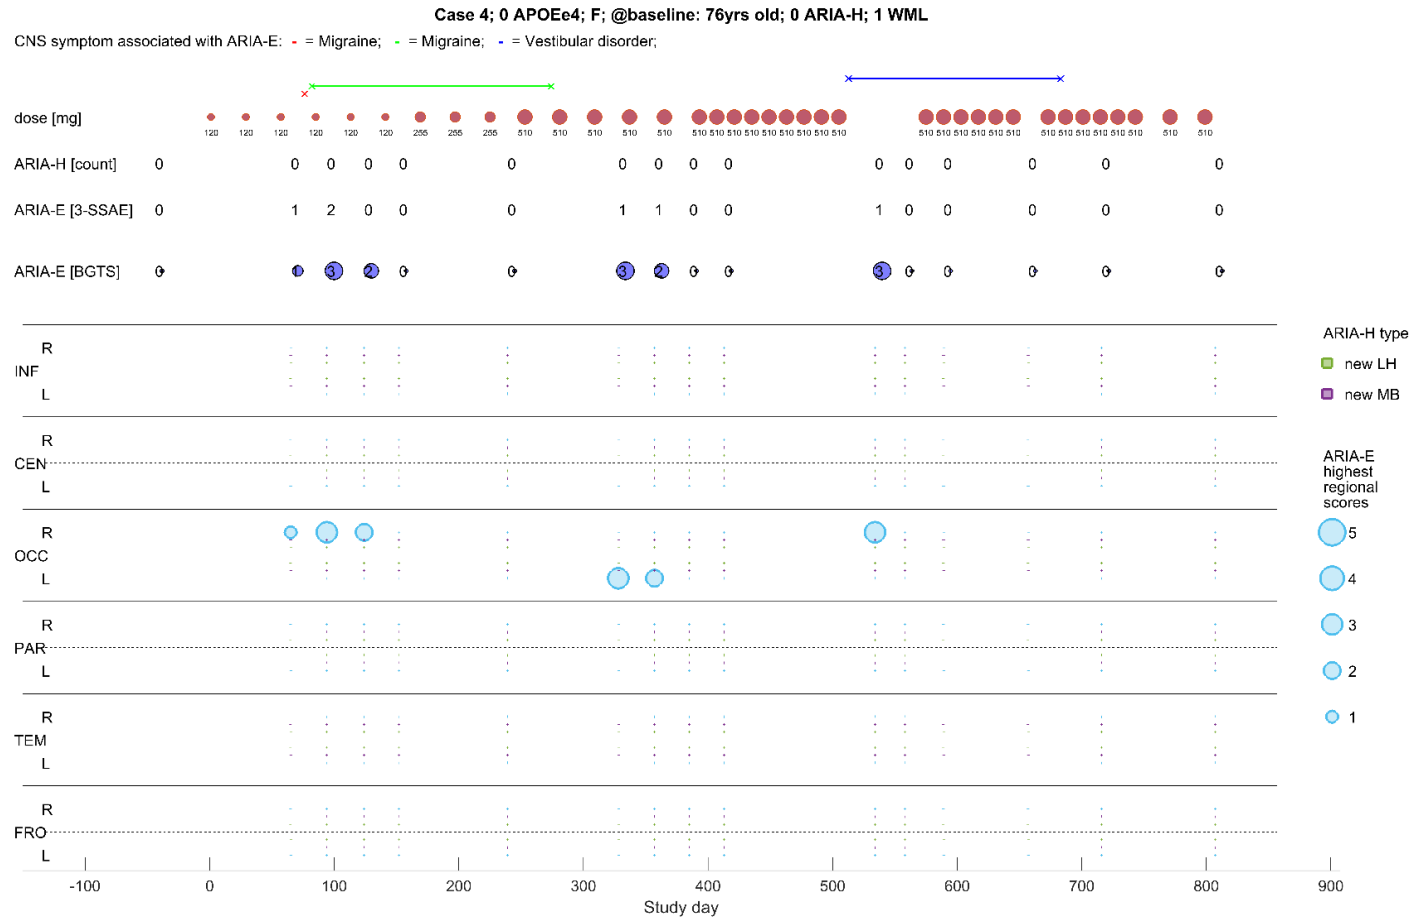

484

485 Abbreviations: 3-SSAE, 3-point Severity Scale of ARIA-E; APOE, apolipoprotein E; ARIA-E, amyloid-related imaging abnormalities  
 486 – edema; ARIA-H, amyloid-related imaging abnormalities – hemosiderosis; BGTS, Barkhof Grand Total Scale; CEN, central region;  
 487 CNS, central nervous system; FRO, frontal lobe; INF, infratentorial region – on each side of the brain; L, left hemisphere; LH,

488 leptomeningeal hemosiderosis; MB, microbleed; MRI, magnetic resonance imaging; OCC, occipital lobe; PAR, parietal lobe; R,  
489 right hemisphere; TEM, temporal lobe; WML, white matter lesion.

490 Individual-level ARIA map. The overall radiological severity of ARIA-E is given by the BGTS, which can take values between 0 and  
491 60 and is obtained by summing the highest regional ARIA-E scores across 12 brain regions (FRO, TEM, PAR, OCC, CEN, INF, L,  
492 R). The regional ARIA-E scores can take values between 0 and 5. The radiological severity of ARIA-E is rated also with the 3-  
493 SSAE The radiological severity of ARIA-H is assessed across the same 12 brain regions as ARIA-E and is given by “ARIA-H  
494 [count],” the total cumulative number of brain bleeds, which can be of two types, eg, MB and LH. “ARIA-H [count]” at a given MRI  
495 visit is the sum between the number of new ARIA-H at that visit and old ARIA-H from all previous MRI visits. The square symbols  
496 illustrate only the new ARIA-H at a given MRI visit. The increase in the size of symbols represents an increase in magnitude.



497 **Case 5**

498 This 60-year-old White male with prodromal AD had an MMSE score at baseline of  
499 18, was a heterozygous APOE  $\epsilon$ 4 carrier, and had hypertension and  
500 hypercholesterolemia. The screening MRI had no microhemorrhages or SS, and  
501 Fazekas score was 1. He was on donepezil. He was not on an antiplatelet or  
502 anticoagulant.

503 His most recent post-baseline MMSE score before ARIA-E development, at week 76,  
504 was 8. He received the 16th target dose of 510 mg Q2W gantenerumab at week 82.  
505 Five days later, the participant received an influenza vaccine (INACT SAG 3V) and  
506 after 30 minutes showed stroke-like symptoms, with weakness on one side, slight  
507 tremors, and slurred speech. On the same day, an unscheduled MRI scan showed  
508 new ARIA-E (BGTS of 11) in the left frontal, left occipital, left parietal, and left temporal  
509 regions.

510 The MRI scan also showed increased white matter signals in the left occipital lobe in  
511 similar distribution as seen in a prior CT scan, with minimal blush of enhancement and  
512 mild restricted diffusion in the cortex of the same region with no evidence of an  
513 underlying mass, suggestive of postictal changes. A CT angiography of the brain/neck  
514 stroke perfusion showed vasogenic edema in the left occipital lobe, which represented  
515 a leptomeningeal pathology versus intraparenchymal lesion. The participant was  
516 diagnosed with severe focal dyscognitive seizures, resulting in hospitalization. Owing  
517 to the symptomatic ARIA-E, treatment with blinded study drug was suspended. An  
518 EEG was indicative of epileptogenicity in the left posterior temporal region, and severe  
519 diffuse encephalopathy and epileptogenicity in the left posterior region. In addition,  
520 numerous electrographic and electroclinical seizures were captured. The participant

521 received treatment with midazolam and fosphenytoin for the focal dyscognitive  
522 seizures, and heparin for prophylaxis.

523 An EEG a day later showed ongoing electroclinical seizures and the participant was  
524 treated with levetiracetam, valproic acid, lacosamide, and methylprednisolone (1 g QD  
525 for 2 days). One day later, dexamethasone was added (26 mg QD for 1 day, followed  
526 by tapering over approximately 4 weeks). One day later, EEG results were consistent  
527 with previous results and sodium valproate was commenced. A day later, with  
528 continued electroconvulsive seizures captured, he received treatment with  
529 oxcarbazepine and clobazam. Two days later, the EEG recording improved with no  
530 seizure seen, and he was discharged from the hospital. It was reported that he  
531 continued to have some behavioral signs of seizure activity, eg, looking to the side,  
532 inappropriate laughter, episodes of staring blankly, and he continued to have aphasia.  
533 He was no longer able to drive or know his way around the neighborhood. He could  
534 no longer bathe himself, use the toilet properly although he was continent, and could  
535 not make himself food or get himself a drink. He had a hard time responding to  
536 commands and became visibly frustrated.

537 Approximately 10 weeks after the hospital discharge, the participant experienced mild  
538 affective disorder, for which he received treatment with escitalopram. Approximately  
539 15 weeks after that (week 104), his MMSE score was 7. Approximately 3 weeks later,  
540 the EEG showed no seizures; episodes of spike and slow wave were noted in the left  
541 temporal and parietal areas, occasionally bilaterally. On the same day, the focal  
542 dyscognitive seizures were considered resolved with sequelae. The PI reported that  
543 damage from the seizures and resultant inflammation made it difficult, if not  
544 impossible. for the AD brain to heal. The PI considered it difficult to parse out the

545 contribution of the ARIA-E from the underlying AD and seizures that occurred.  
546 Approximately 16 weeks later, an unscheduled MRI scan revealed no ARIA-E findings.  
547 The event of affective disorder was unresolved at the time of study completion. His  
548 last measured MMSE score, at week 116, was 3 (15 points lower than baseline).  
549 MRI findings of ARIA observed during the double-blind treatment period of the study  
550 are presented below.

Case 5; 1 APOEε4; M; @baseline: 60yrs old; 0 ARIA-H; 1 WML

CNS symptom associated with ARIA-E: - = Focal dyscognitive seizures;

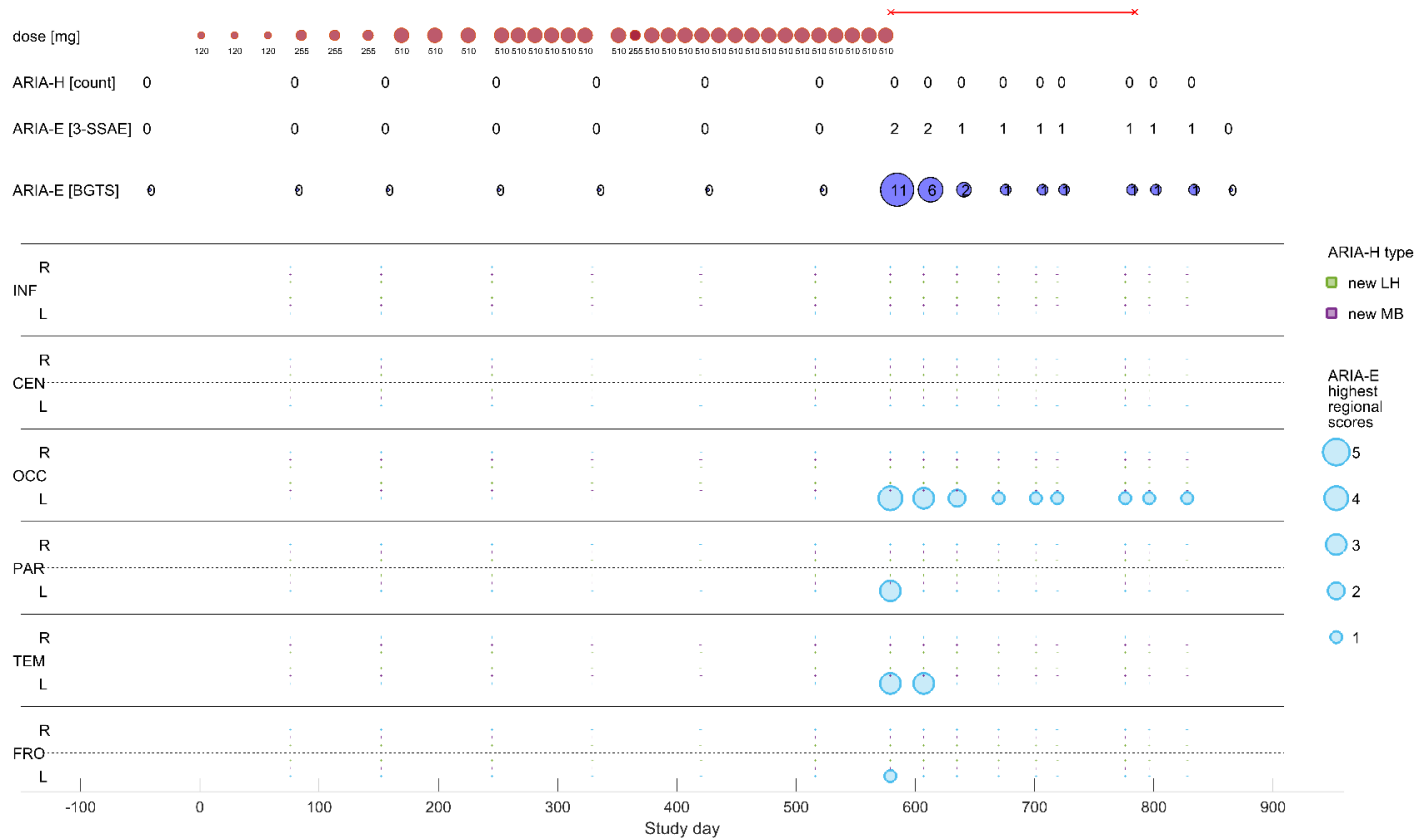

551

552 Abbreviations: 3-SSAE, 3-point Severity Scale of ARIA-E; APOE, apolipoprotein E; ARIA-E, amyloid-related imaging abnormalities  
 553 – edema; ARIA-H, amyloid-related imaging abnormalities – hemosiderosis; BGTS, Barkhof Grand Total Scale; CEN, central region;  
 554 CNS, central nervous system; FRO, frontal lobe; INF, infratentorial region – on each side of the brain; L, left hemisphere; LH,

555 leptomeningeal hemosiderosis; MB, microbleed; MRI, magnetic resonance imaging; OCC, occipital lobe; PAR, parietal lobe; R,  
556 right hemisphere; TEM, temporal lobe; WML, white matter lesion.

557 Individual-level ARIA map. The overall radiological severity of ARIA-E is given by the BGTS, which can take values between 0 and  
558 60 and is obtained by summing the highest regional ARIA-E scores across 12 brain regions (FRO, TEM, PAR, OCC, CEN, INF, L,  
559 R). The regional ARIA-E scores can take values between 0 and 5. The radiological severity of ARIA-E is rated also with the 3-  
560 SSAE The radiological severity of ARIA-H is assessed across the same 12 brain regions as ARIA-E and is given by “ARIA-H  
561 [count],” the total cumulative number of brain bleeds, which can be of two types, eg, MB and LH. “ARIA-H [count]” at a given MRI  
562 visit is the sum between the number of new ARIA-H at that visit and old ARIA-H from all previous MRI visits. The square symbols  
563 illustrate only the new ARIA-H at a given MRI visit. The increase in the size of symbols represents an increase in magnitude.

564 **Case 6**

565 This 72-year-old White male with prodromal AD had an MMSE score at baseline of  
566 28, was a non-carrier of APOE  $\epsilon$ 4, and had hypercholesterolemia. The screening MRI  
567 did not show microhemorrhages or SS, and Fazekas score was 0. He was on  
568 donepezil. He was not on an antiplatelet or anticoagulant.

569 Prior to the serious symptomatic ARIA-E event, he had an asymptomatic ARIA-E  
570 episode from study week 36 to week 44, following two doses of 510 mg gantenerumab  
571 Q4W, with a maximum BGTS severity of 4 and dosing suspension. At week 36, he  
572 also had three new ARIA-H findings (one microhemorrhage and two focal areas of  
573 SS).

574 His most recent MMSE score, at week 52, was 22. Following gantenerumab dose  
575 resumption, seven gantenerumab doses, including six at target level (510 mg Q2W)  
576 were administered prior to the serious symptomatic ARIA-E, with the most recent dose  
577 at week 58. One day later, the scheduled week 60 MRI scan showed 40 new  
578 microhemorrhages in the right frontal and right temporal regions and two new areas  
579 of SS in the right frontal region (cumulative ARIA-H of 45). This MRI scan also showed  
580 new ARIA-E findings (BGTS of 20) in the right frontal, bilateral occipital, right parietal,  
581 and right temporal regions.

582 In addition, within 24 hours after the end of injection, the participant experienced mild  
583 paresthesia in the fingers of both hands. No treatment was given for the paresthesia.  
584 Owing to the week 60 finding of 45 ARIA-H cumulatively, treatment with gantenerumab  
585 was permanently discontinued as required per the study protocol.

586 Ten days after ARIA-E detection, the participant became incoherent and was taken to  
587 the emergency room. On the same day, the event of paresthesia was considered  
588 resolved. One day later, the participant was more confused throughout the day. He  
589 had spells of staring off into space for around 30 seconds and he would not respond  
590 to inquiry. The following day, he was hospitalized to rule out stroke and urinary tract  
591 infection (UTI). At the time of admission, he was noted with word-finding difficulty,  
592 fluctuations in orientation, inattention, and intermittent confusion. A chest X-ray and  
593 an ultrasound showed negative results. A head CT scan showed right frontal and  
594 parieto-occipital swelling. Continuous EEG showed focal slowing in the right  
595 hemisphere, indicating focal cerebral dysfunction and mild-to-moderate generalized  
596 slowing. Locally performed brain MRI showed nonspecific findings that were likely  
597 ARIA-E and ARIA-H primarily throughout the right hemisphere (scan not available to  
598 the Sponsor). The participant was diagnosed with encephalopathy and assessed by  
599 the investigator as related to the blinded study drug. The participant received treatment  
600 with quetiapine and levetiracetam. He further received treatment with IV  
601 methylprednisolone 1 g QD for 4 days for the ARIA-E, leading to only minimal  
602 improvement. Six days after admission, he was discharged from the hospital.

603 Approximately 6 weeks after the hospital discharge, an early termination MRI scan  
604 revealed no ARIA-E findings. It was reported that all his symptoms resolved after  
605 approximately 16 weeks from onset. His last measured MMSE score, at week 116,  
606 was 20 (8 points lower than at baseline).

607 MRI findings of ARIA observed during the double-blind treatment period of the study  
608 are presented below.

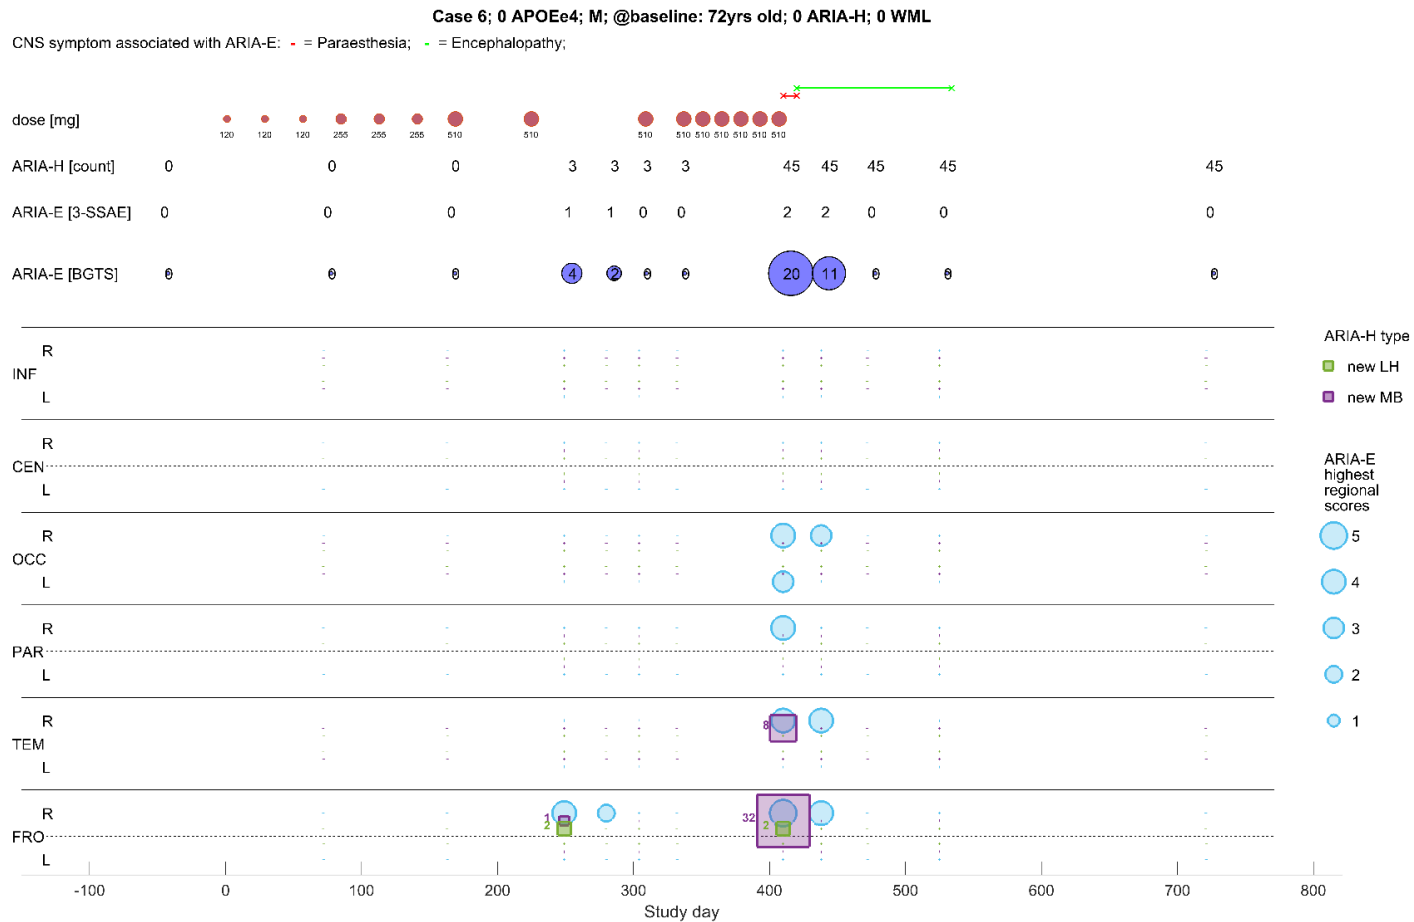

609

610 Abbreviations: 3-SSAE, 3-point Severity Scale of ARIA-E; APOE, apolipoprotein E; ARIA-E, amyloid-related imaging abnormalities  
 611 – edema; ARIA-H, amyloid-related imaging abnormalities – hemosiderosis; BGTS, Barkhof Grand Total Scale; CEN, central region;  
 612 CNS, central nervous system; FRO, frontal lobe; INF, infratentorial region – on each side of the brain; L, left hemisphere; LH,



613 leptomeningeal hemosiderosis; MB, microbleed; MRI, magnetic resonance imaging; OCC, occipital lobe; PAR, parietal lobe; R,  
614 right hemisphere; TEM, temporal lobe; WML, white matter lesion.

615 Individual-level ARIA map. The overall radiological severity of ARIA-E is given by the BGTS, which can take values between 0 and  
616 60 and is obtained by summing the highest regional ARIA-E scores across 12 brain regions (FRO, TEM, PAR, OCC, CEN, INF, L,  
617 R). The regional ARIA-E scores can take values between 0 and 5. The radiological severity of ARIA-E is rated also with the 3-  
618 SSAE The radiological severity of ARIA-H is assessed across the same 12 brain regions as ARIA-E and is given by “ARIA-H  
619 [count],” the total cumulative number of brain bleeds, which can be of two types, eg, MB and LH. “ARIA-H [count]” at a given MRI  
620 visit is the sum between the number of new ARIA-H at that visit and old ARIA-H from all previous MRI visits. The square symbols  
621 illustrate only the new ARIA-H at a given MRI visit. The increase in the size of symbols represents an increase in magnitude.

622 **Case 7**

623 This 77-year-old White female with prodromal AD had an MMSE score at baseline of  
624 24, was a homozygous APOE ε4 carrier, and had no relevant medical history. The  
625 screening MRI revealed one microhemorrhage in the left temporal region and one area  
626 of SS in the right frontal region, and Fazekas score was 2. She was not on  
627 symptomatic AD medication, an antiplatelet, or anticoagulant.

628 Prior to the serious symptomatic ARIA-E event, she had an asymptomatic ARIA-E  
629 episode from study week 12 to week 32 after three doses of 120 mg Q4W  
630 gantenerumab, with a maximum BGTS of 13 and dosing suspension. At week 36, she  
631 had two new microhemorrhages.

632 Following gantenerumab dose resumption, four gantenerumab doses, including three  
633 at the 255 mg Q2W level, were administered prior to the serious symptomatic ARIA-  
634 E, with the most recent dose at week 44. Approximately 3 weeks later, the scheduled  
635 week 48 MRI scan showed 15 new microhemorrhages in the bilateral temporal and  
636 bilateral frontal regions (cumulative ARIA-H of 19). It also showed new ARIA-E (BGTS  
637 of 23) in the bilateral frontal, bilateral occipital, bilateral temporal, and left parietal  
638 regions.

639 Owing to the week 48 finding of 19 ARIA-H cumulatively, treatment with gantenerumab  
640 was permanently discontinued as required per the study protocol. Four days later, the  
641 participant experienced confusion and was diagnosed with severe mental status  
642 changes. She was hospitalized to rule out a cerebrovascular accident. A laboratory  
643 workup showed a normal level of electrolytes with no infection. A head CT scan  
644 showed no acute intracranial abnormality. An MRI scan was consistent with severe  
645 multifocal ARIA-E and ARIA-H (scan not available to the Sponsor). On the next day,

646 her mental state worsened as she was not responding to any commands other than  
647 opening her eyes. A repeat CT scan of the head showed multiple areas of vasogenic  
648 edema in both cerebral hemispheres. CSF analysis revealed no abnormal findings. An  
649 EEG showed intermittent left hemisphere slowing and moderate generalized slowing  
650 with triphasic waves, indicative of diffuse cerebral dysfunction. She received treatment  
651 with magnesium sulfate. She was also treated with ceftriaxone for mild UTI, based on  
652 urinalysis. Cognition improved and she was discharged to a rehabilitation facility; she  
653 was switched to cephalexin for the UTI. Over the next 2 days, her cognition fluctuated  
654 in the context of fever (body temperature of 100.5 °F). A repeat culture showed the  
655 presence of pan-sensitive E. coli and the participant was switched back to ceftriaxone.  
656 Two days after the hospital discharge, she became afebrile, and her mental status  
657 returned to baseline. On the suspicion that seizures might have accounted for her  
658 episodic mental status changes, treatment with levetiracetam and corticosteroids  
659 (regimen details not provided to the Sponsor) was started by the rehabilitation team  
660 after consulting the neurologist. Approximately 2 weeks later, she was discharged from  
661 the rehabilitation center. After a further, approximately, 7 weeks, her MMSE score was  
662 25 and the event of mental status changes was considered resolved. Approximately 4  
663 weeks after that, MRI revealed no ARIA-E findings. Her last measured MMSE score,  
664 at week 116, was 22 (2 points lower than at baseline).

665 MRI findings of ARIA observed at screening and during the double-blind treatment  
666 period of the study are presented below.

Case 7; 2 APOEε4; F; @baseline: 77yrs old; 2 ARIA-H; 2 WML

CNS symptom associated with ARIA-E: - = Mental status changes;

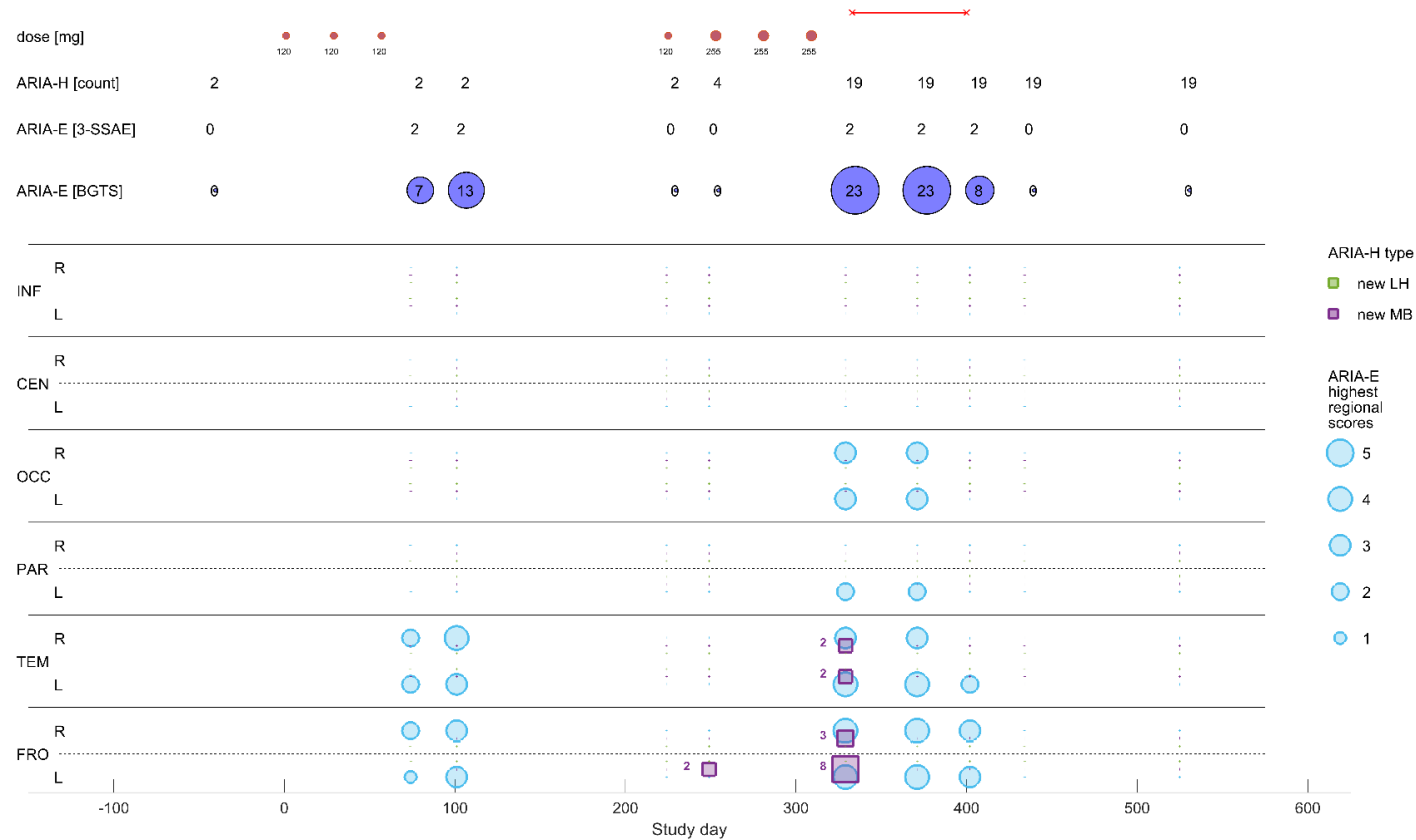

667

668 Abbreviations: 3-SSAE, 3-point Severity Scale of ARIA-E; APOE, apolipoprotein E; ARIA-E, amyloid-related imaging abnormalities  
 669 – edema; ARIA-H, amyloid-related imaging abnormalities – hemosiderosis; BGTS, Barkhof Grand Total Scale; CEN, central region;  
 670 CNS, central nervous system; FRO, frontal lobe; INF, infratentorial region – on each side of the brain; L, left hemisphere; LH,

671 leptomeningeal hemosiderosis; MB, microbleed; MRI, magnetic resonance imaging; OCC, occipital lobe; PAR, parietal lobe; R,  
672 right hemisphere; TEM, temporal lobe; WML, white matter lesion.

673 Individual-level ARIA map. The overall radiological severity of ARIA-E is given by the BGTS, which can take values between 0 and  
674 60 and is obtained by summing the highest regional ARIA-E scores across 12 brain regions (FRO, TEM, PAR, OCC, CEN, INF, L,  
675 R). The regional ARIA-E scores can take values between 0 and 5. The radiological severity of ARIA-E is rated also with the 3-  
676 SSAE The radiological severity of ARIA-H is assessed across the same 12 brain regions as ARIA-E and is given by “ARIA-H  
677 [count],” the total cumulative number of brain bleeds, which can be of two types, eg, MB and LH. “ARIA-H [count]” at a given MRI  
678 visit is the sum between the number of new ARIA-H at that visit and old ARIA-H from all previous MRI visits. The square symbols  
679 illustrate only the new ARIA-H at a given MRI visit. The increase in the size of symbols represents an increase in magnitude.

680 **Case 8**

681 This 77-year-old White male with prodromal AD had an MMSE score at baseline of  
682 24, was a non-carrier of APOE  $\epsilon$ 4, and had type 2 diabetes, hypercholesterolemia,  
683 and hypertension. The screening MRI revealed one area of SS in the right parietal  
684 region, and Fazekas score was 1. He was not on symptomatic AD medication. He was  
685 on acetylsalicylic acid (325 mg QD) but not on anticoagulants.

686 The most recent dose of gantenerumab prior to the serious symptomatic ARIA-E event  
687 was administered at week 16 (second dose of 255 mg Q4W). Three weeks later, the  
688 participant experienced increased confusion, brief seizure-like activity, and was  
689 reported to be “bumping into things.” A brain CT showed cerebral edema and an  
690 unscheduled brain MRI scan showed ARIA-E (BGTS of 22) in the right frontal, bilateral  
691 temporal, bilateral parietal, and bilateral occipital regions.

692 Owing to the BGTS  $\geq$  4, treatment with gantenerumab was suspended. The participant  
693 received treatment with methylprednisolone for the ARIA-E (1 g QD for 2 days). The  
694 participant then experienced mild blurring of vision and visual hallucinations, which  
695 both resolved without any treatment. The mental status changes resolved over 6 days,  
696 and he was discharged from the hospital.

697 Approximately 3 weeks later, MRI showed that the ARIA-E decreased (BGTS 12), but  
698 there were three new microhemorrhages and two new areas of SS in the right parietal  
699 region (cumulative ARIA-H count of 6); and week 24 MMSE score was 20 (4 points  
700 lower than at baseline). Approximately 7 weeks after that, the scheduled MRI scan  
701 showed no ARIA-E findings, leading to gantenerumab resumption.

702 After a further four gantenerumab doses, including three at 510 mg Q4W level, the  
703 participant experienced ARIA-E recurrence between study week 48 and week 64  
704 (asymptomatic; maximum BGTS of 7, leading to dosing suspension). After the ARIA-  
705 E resolved, gantenerumab was again resumed, for a further four doses of 510 mg  
706 Q4W, without ARIA-E recurrence, but treatment was then permanently discontinued  
707 after the scheduled week 76 MRI scan for accumulating four focal areas of SS  
708 cumulatively (a protocol criterion for permanent study drug discontinuation). At this  
709 point, the last available MMSE score was from week 24.

710 MRI findings of ARIA observed at screening and during the double-blind treatment  
711 period of the study are presented below.

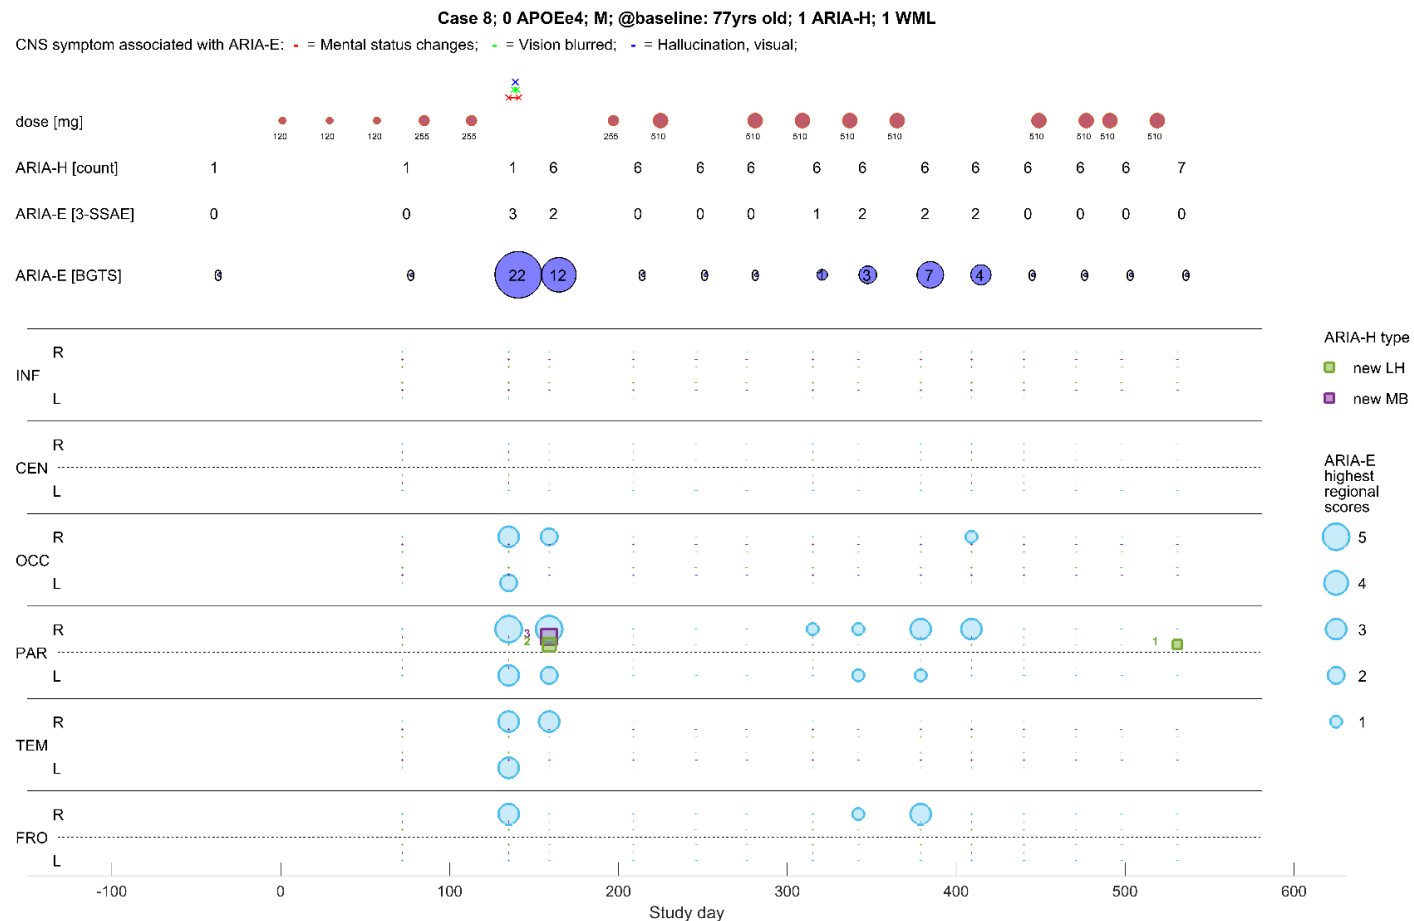

712

713 Abbreviations: 3-SSAE, 3-point Severity Scale of ARIA-E; APOE, apolipoprotein E; ARIA-E, amyloid-related imaging abnormalities  
 714 – edema; ARIA-H, amyloid-related imaging abnormalities – hemosiderosis; BGTS, Barkhof Grand Total Scale; CEN, central region;  
 715 CNS, central nervous system; FRO, frontal lobe; INF, infratentorial region – on each side of the brain; L, left hemisphere; LH,



716 leptomenigeal hemosiderosis; MB, microbleed; MRI, magnetic resonance imaging; OCC, occipital lobe; PAR, parietal lobe; R,  
717 right hemisphere; TEM, temporal lobe; WML, white matter lesion.

718 Individual-level ARIA map. The overall radiological severity of ARIA-E is given by the BGTS, which can take values between 0 and  
719 60 and is obtained by summing the highest regional ARIA-E scores across 12 brain regions (FRO, TEM, PAR, OCC, CEN, INF, L,  
720 R). The regional ARIA-E scores can take values between 0 and 5. The radiological severity of ARIA-E is rated also with the 3-  
721 SSAE The radiological severity of ARIA-H is assessed across the same 12 brain regions as ARIA-E and is given by “ARIA-H  
722 [count],” the total cumulative number of brain bleeds, which can be of two types, eg, MB and LH. “ARIA-H [count]” at a given MRI  
723 visit is the sum between the number of new ARIA-H at that visit and old ARIA-H from all previous MRI visits. The square symbols  
724 illustrate only the new ARIA-H at a given MRI visit. The increase in the size of symbols represents an increase in magnitude.

725 **Case 9**

726 This 80-year-old White female with prodromal AD had an MMSE score at baseline of  
727 20, was a non-carrier of APOE  $\epsilon$ 4 allele, and had no relevant medical history. The  
728 screening MRI had no microhemorrhages or SS, and Fazekas score was 1. She was  
729 on memantine. She received acetylsalicylic acid 100 mg QD. She was not on  
730 anticoagulants.

731 Her most recent post-baseline MMSE score, at week 24, was 23. The most recent  
732 dose of gantenerumab prior to the serious symptomatic ARIA-E event was  
733 administered at week 38 (second target dose of 510 mg Q2W). Five days later, the  
734 participant developed confusion, apraxia, and motor aphasia; she was unable to hold  
735 any object in her hands, write, or speak, but had preserved comprehension. An  
736 unscheduled brain MRI scan showed new ARIA-E (BGTS of 34) with multiple  
737 hyperintensities and edema in right frontal, right frontoparietal, right postrolandic, right  
738 temporal, left frontoparietal, left parietal, left occipital, and left temporo-polar regions,  
739 consistent with the symptoms. It also showed six new microhemorrhages in the  
740 bilateral parietal and right frontal regions (cumulative ARIA-H count of 6).

741 The participant was hospitalized on the same day. The blood and CSF tests showed  
742 an increase of proteins but no evidence of a cerebral or other infection. She received  
743 treatment with mannitol and dexamethasone (8 mg QD for 5 days, with subsequent  
744 tapering over the next approximately 6 weeks). Over the next few days, the confusion  
745 and apraxia resolved, although there was ongoing aphasia. A follow-up MRI scan  
746 showed a slight decrease of intracranial edema. She was subsequently discharged  
747 from the hospital. The aphasia resolved. Owing to the BGTS  $\geq$ 4, treatment with  
748 gantenerumab was suspended.

749 Ten days after hospital discharge, the participant experienced praxis difficulties again  
750 and was re-hospitalized for treatment with mannitol and dexamethasone (8 mg QD for  
751 5 days, with subsequent tapering over the following 3 weeks). An unscheduled MRI  
752 finding showed two new microhemorrhages in the left occipital region (cumulative  
753 ARIA-H of 8). She was discharged 10 days later, after the confusional state and  
754 apraxia resolved and the aphasia improved. The aphasia resolved approximately  
755 3 weeks after the hospital discharge. However, 10 days later, the participant had  
756 dyspraxia, for which she was again re-hospitalized and treated with mannitol and  
757 dexamethasone (8 mg QD for 10 days, with tapering over approximately 4 weeks).  
758 She was discharged 10 days after admission after the dyspraxia improved. The  
759 dyspraxia resolved 11 days later. However, the participant had a further mild  
760 recurrence of aphasia and dyspraxia approximately 3 weeks later.

761 Approximately 9 weeks after the recurrence of aphasia and dyspraxia, at week 52,  
762 MMSE score was 17. A scheduled week 60 MRI scan revealed no ARIA-E findings,  
763 but it took approximately 14 weeks for the symptoms to completely resolve. At week  
764 76, MMSE score was 18.

765 At study week 92, treatment with blinded study drug was resumed. After 6 further  
766 gantenerumab doses, including two at target dose level (510 mg Q2W), the participant  
767 developed irritability and occasional agitation, and an unscheduled MRI scan showed  
768 new ARIA-E (BGTS of 27) in the bilateral frontal, bilateral parietal, bilateral occipital,  
769 and left temporal regions. It also showed nine new microhemorrhages in the left frontal,  
770 left parietal, and left temporal regions (cumulative ARIA-H of 17, which led to  
771 permanent study drug discontinuation as required per the study protocol). The  
772 participant was hospitalized and received treatment with mannitol and dexamethasone

773 (4 mg QD for 1 day, then 8 mg QD for 5 days with tapering over 3 weeks) and was  
774 discharged after 4 days. Symptoms resolved over approximately 4 weeks. After  
775 15 weeks, an MRI scan revealed no ARIA-E findings. Her last measured MMSE score,  
776 at the early termination visit 118 weeks from baseline, was 15 (5 points lower than at  
777 baseline).

778 MRI findings of ARIA observed during the double-blind treatment period of the study  
779 are presented below.



784 leptomeningeal hemosiderosis; MB, microbleed; MRI, magnetic resonance imaging; OCC, occipital lobe; PAR, parietal lobe; R,  
785 right hemisphere; TEM, temporal lobe; WML, white matter lesion.

786 Individual-level ARIA map. The overall radiological severity of ARIA-E is given by the BGTS, which can take values between 0 and  
787 60 and is obtained by summing the highest regional ARIA-E scores across 12 brain regions (FRO, TEM, PAR, OCC, CEN, INF, L,  
788 R). The regional ARIA-E scores can take values between 0 and 5. The radiological severity of ARIA-E is rated also with the 3-  
789 SSAE The radiological severity of ARIA-H is assessed across the same 12 brain regions as ARIA-E and is given by “ARIA-H  
790 [count],” the total cumulative number of brain bleeds, which can be of two types, eg, MB and LH. “ARIA-H [count]” at a given MRI  
791 visit is the sum between the number of new ARIA-H at that visit and old ARIA-H from all previous MRI visits. The square symbols  
792 illustrate only the new ARIA-H at a given MRI visit. The increase in the size of symbols represents an increase in magnitude.

793 **Case 10**

794 This 74-year-old White female with prodromal AD had an MMSE score at baseline of  
795 25, was a homozygous APOE  $\epsilon$ 4 carrier, and had a history of migraines. The screening  
796 MRI had no microhemorrhages or SS, and Fazekas score was 1. She was not on  
797 symptomatic AD medication. She was on acetylsalicylic acid 81 mg QD. She was not  
798 on anticoagulants.

799 Her most recent post-baseline MMSE score, at week 24, was 24. The most recent  
800 dose of gantenerumab prior to the serious symptomatic ARIA-E event was  
801 administered at week 46 (sixth target dose of 510 mg Q2W). One day later, the  
802 scheduled week 48 MRI scan showed new ARIA-E (BGTS of 29) in the bilateral frontal,  
803 bilateral infratentorial, right temporal, right occipital, and right parietal regions. It also  
804 revealed eight new microhemorrhages (four in the right frontal and four in the right  
805 temporal regions) and six new areas of SS in the bilateral frontal regions (cumulative  
806 ARIA-H count of 14; see Figure 2 below for the ARIA-H and the ARIA-E at its highest  
807 severity, BGTS of 31, reported on a follow-up MRI). The findings were considered  
808 medically significant (ie, serious AEs).

809 Owing to the week 48 ARIA-H findings of six focal areas of SS cumulatively, treatment  
810 with gantenerumab was permanently discontinued as required per the study protocol.  
811 While the ARIA-E was ongoing (approximately 7 weeks after its detection), the  
812 participant experienced a mild headache treated with paracetamol that resolved within  
813 a day.

814 After approximately 18 weeks from ARIA-E onset, an MRI scan showed that the ARIA-  
815 E resolved but it also showed 14 new microhemorrhages in the right frontal, right  
816 parietal, and right temporal regions (cumulative ARIA-H of 28). A further MRI scan

817 4 weeks later showed two new microhemorrhages in the right frontal and right  
818 temporal regions (cumulative ARIA-H of 30). Her last measured MMSE score, at an  
819 early termination visit 104 weeks from baseline, was 25 (unchanged since baseline).

820 MRI findings of ARIA observed during the double-blind treatment period of the study  
821 are presented below.



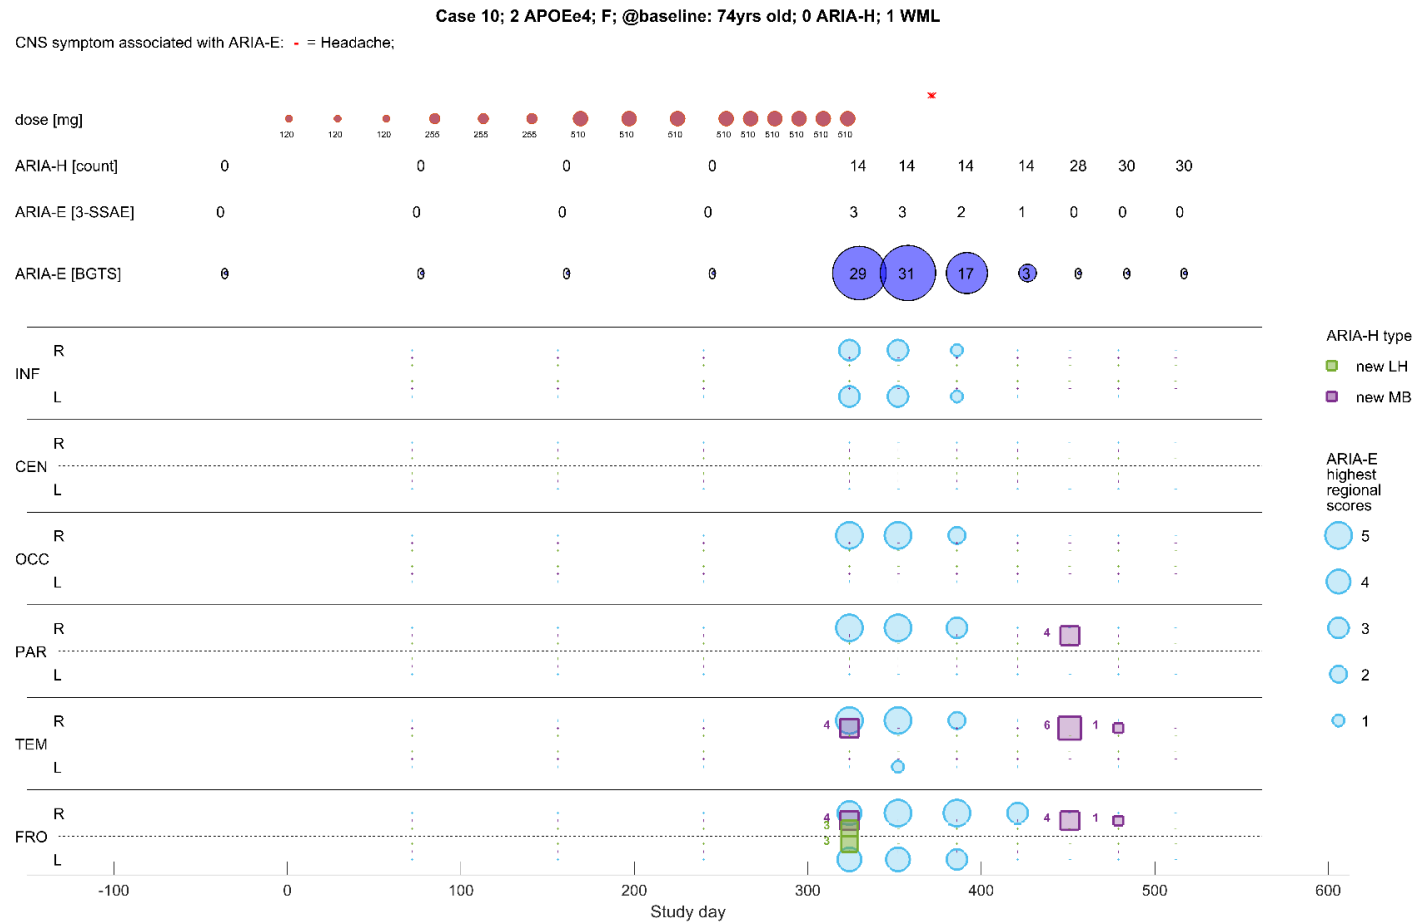

822

823 Abbreviations: 3-SSAE, 3-point Severity Scale of ARIA-E; APOE, apolipoprotein E; ARIA-E, amyloid-related imaging abnormalities  
 824 – edema; ARIA-H, amyloid-related imaging abnormalities – hemosiderosis; BGTS, Barkhof Grand Total Scale; CEN, central region;  
 825 CNS, central nervous system; FRO, frontal lobe; INF, infratentorial region – on each side of the brain; L, left hemisphere; LH,

826 leptomeningeal hemosiderosis; MB, microbleed; MRI, magnetic resonance imaging; OCC, occipital lobe; PAR, parietal lobe; R,  
827 right hemisphere; TEM, temporal lobe; WML, white matter lesion.

828 Individual-level ARIA map. The overall radiological severity of ARIA-E is given by the BGTS, which can take values between 0 and  
829 60 and is obtained by summing the highest regional ARIA-E scores across 12 brain regions (FRO, TEM, PAR, OCC, CEN, INF, L,  
830 R). The regional ARIA-E scores can take values between 0 and 5. The radiological severity of ARIA-E is rated also with the 3-  
831 SSAE The radiological severity of ARIA-H is assessed across the same 12 brain regions as ARIA-E and is given by “ARIA-H  
832 [count],” the total cumulative number of brain bleeds, which can be of two types, eg, MB and LH. “ARIA-H [count]” at a given MRI  
833 visit is the sum between the number of new ARIA-H at that visit and old ARIA-H from all previous MRI visits. The square symbols  
834 illustrate only the new ARIA-H at a given MRI visit. The increase in the size of symbols represents an increase in magnitude.

835

836 **Case 11**

837 This 73-year-old White female with prodromal AD had an MMSE score at baseline of  
838 22, was a homozygous APOE  $\epsilon$ 4 carrier, and had no relevant medical history. The  
839 screening MRI had no microhemorrhages or SS, and Fazekas score was 1. The  
840 participant was not on symptomatic AD medication, antiplatelets, or anticoagulants.

841 Prior to the serious symptomatic ARIA-E event, the participant had an asymptomatic  
842 ARIA-E episode from study week 44 to week 64, after three doses of 510 mg Q4W  
843 gantenerumab, with a maximum BGTS severity of 15 and dosing suspension. She  
844 also concurrently had nine new microhemorrhages in the bilateral temporal region and  
845 one new focal area of SS in the left temporal region at week 48 (cumulative ARIA-H  
846 of 11).

847 Following gantenerumab dosing resumption, 11 gantenerumab doses, including 10  
848 target doses (510 mg Q2W) were administered. Her MMSE score at week 76 was 22.  
849 At week 86, within hours of the tenth target gantenerumab dose, the participant  
850 developed a strange facial appearance and profound speech disturbance. She also  
851 had comprehension difficulties. She presented to the emergency room where she was  
852 noted to have increased blinking frequency and subtle, symmetrical perioral  
853 contractions, high flicker frequency, symmetrical facial grimace, and conjugated gaze  
854 with a tendency to look towards the right. The bilateral flexor response was present  
855 and symmetrical. She was able to maintain all four extremities against gravity, with  
856 occasional claudication and clonus. She was diagnosed with moderate events of  
857 aphasia and status epilepticus. It was reported that she also had an “evening  
858 headache” for approximately 3 weeks. A local cranial CT scan with angiography

859 showed vasogenic edema with extensive hypodensities of white matter mainly  
860 affecting left hemisphere (temporal, frontal, and parietal lobe), with less intensity in the  
861 right hemisphere (posterior regions); no large vessel occlusion was noted. Locally  
862 performed MRI showed areas of bi-hemispheric vasogenic edema (predominantly left  
863 with cortical involvement) associated with multiple microhemorrhages. The hemogram  
864 and biochemistry results were normal. She was diagnosed with ARIA-E of severe  
865 intensity and hospitalized. She received treatment with methylprednisolone (1 g QD for  
866 5 days), and levetiracetam (starting dose of 3 g QD, tapered over 22 weeks). The  
867 status epilepticus resolved the same day with treatment.

868 An MRI scan the next day confirmed ARIA-E findings (BGTS of 26) in the left temporal,  
869 bilateral frontal, bilateral parietal, and bilateral occipital regions. It also showed 15 new  
870 microhemorrhages in the left parietal, left occipital, and left temporal regions  
871 (cumulative ARIA-H of 26, leading to permanent study drug discontinuation as  
872 required per the study protocol; see Figure 3 below).

873 On the same day, an EEG showed slow and attenuated periodic epileptiform activity  
874 in the left hemisphere, suggestive of lesional interictal pericritic pattern. An EEG  
875 repeated after 9 days showed that periodic activity persisted but with significant  
876 improvement and the participant was discharged from the hospital on lacosamide  
877 (300 mg QD) with close follow-up. Three weeks later, MRI showed 14 new  
878 microhemorrhages in the bilateral frontal and right parietal regions (cumulative ARIA-  
879 H count of 40). She subsequently attended an early termination visit and had an MMSE  
880 score of 14. Approximately 6 weeks later, the participant was noted to have worsening  
881 memory problems (of mild severity). Approximately 4 weeks after that, she  
882 experienced mild gait disturbance. A further 4 weeks later, the aphasia, memory

883 impairment, and gait disturbance were considered resolved. Approximately 5 weeks  
884 later, MRI showed four new areas of SS in the bilateral frontal region (cumulative  
885 ARIA-H count of 44). After a further 4 weeks, MRI revealed no ARIA-E. Approximately  
886 13 weeks later, the participant was reported to be stable, with right hemicranial  
887 headache about 5–10 days a month, which subsided with paracetamol treatment. The  
888 headache was resolving at the time of study completion. Her last measured MMSE  
889 score, at week 116, was 20 (2 points lower than baseline, but 6 points higher than at  
890 the early termination visit).

891 MRI findings of ARIA observed during the double-blind treatment period of the study  
892 are presented below.

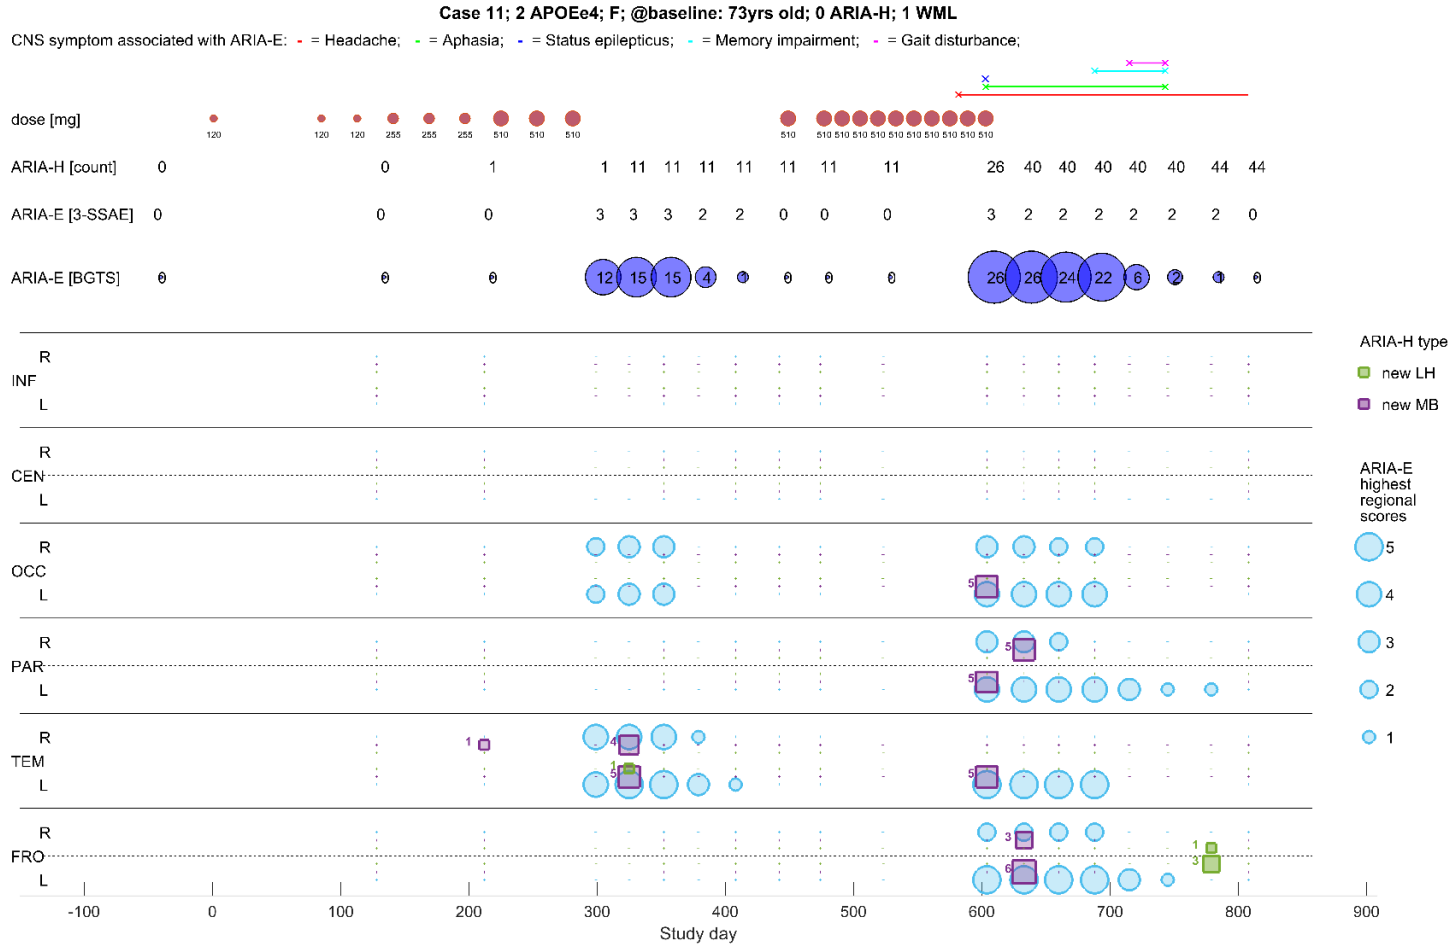

893

894 Abbreviations: 3-SSAE, 3-point Severity Scale of ARIA-E; APOE, apolipoprotein E; ARIA-E, amyloid-related imaging abnormalities  
 895 – edema; ARIA-H, amyloid-related imaging abnormalities – hemosiderosis; BGTS, Barkhof Grand Total Scale; CEN, central region;

896 CNS, central nervous system; FRO, frontal lobe; INF, infratentorial region – on each side of the brain; L, left hemisphere; LH,  
897 leptomenigeal hemosiderosis; MB, microbleed; MRI, magnetic resonance imaging; OCC, occipital lobe; PAR, parietal lobe; R,  
898 right hemisphere; TEM, temporal lobe; WML, white matter lesion.

899 Individual-level ARIA map. The overall radiological severity of ARIA-E is given by the BGTS, which can take values between 0 and  
900 60 and is obtained by summing the highest regional ARIA-E scores across 12 brain regions (FRO, TEM, PAR, OCC, CEN, INF, L,  
901 R). The regional ARIA-E scores can take values between 0 and 5. The radiological severity of ARIA-E is rated also with the 3-  
902 SSAE The radiological severity of ARIA-H is assessed across the same 12 brain regions as ARIA-E and is given by “ARIA-H  
903 [count],” the total cumulative number of brain bleeds, which can be of two types, eg, MB and LH. “ARIA-H [count]” at a given MRI  
904 visit is the sum between the number of new ARIA-H at that visit and old ARIA-H from all previous MRI visits. The square symbols  
905 illustrate only the new ARIA-H at a given MRI visit. The increase in the size of symbols represents an increase in magnitude.

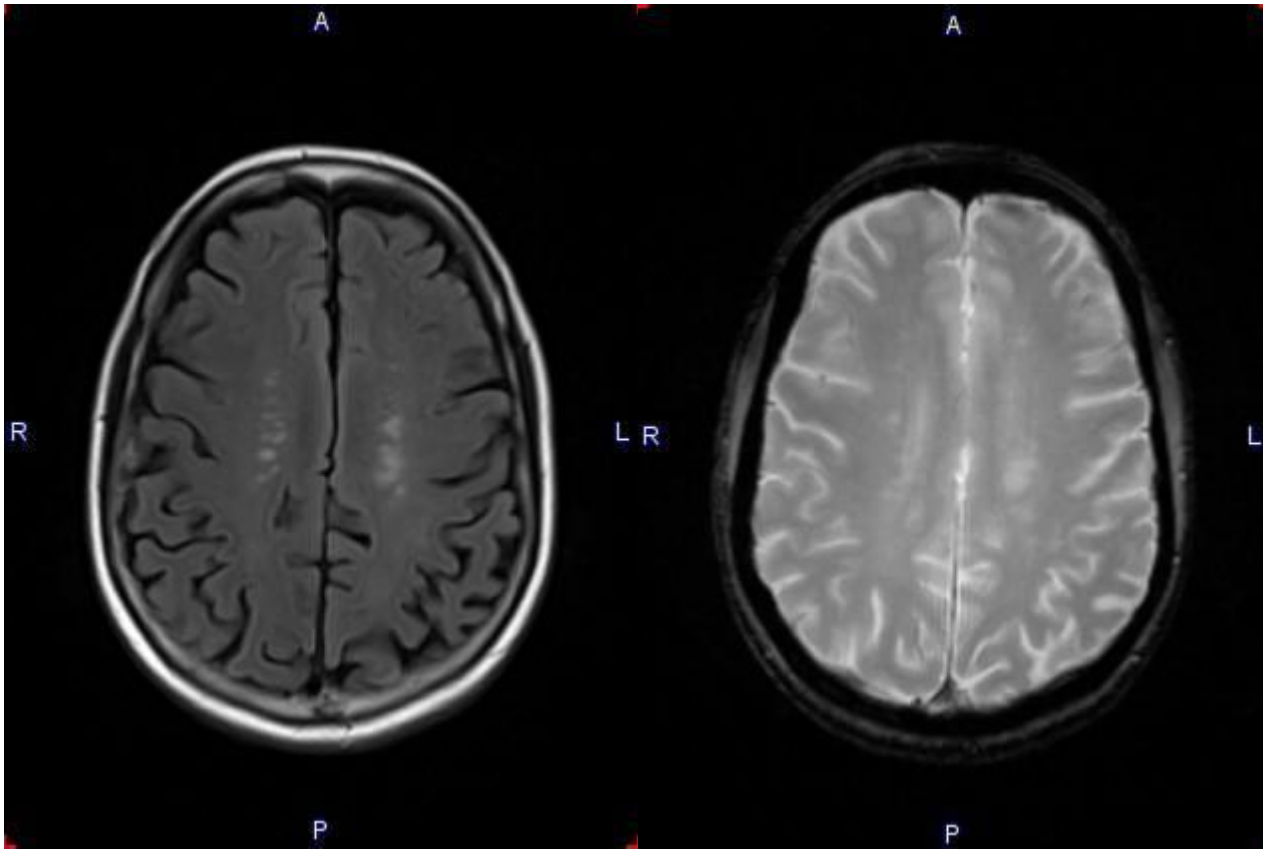

906



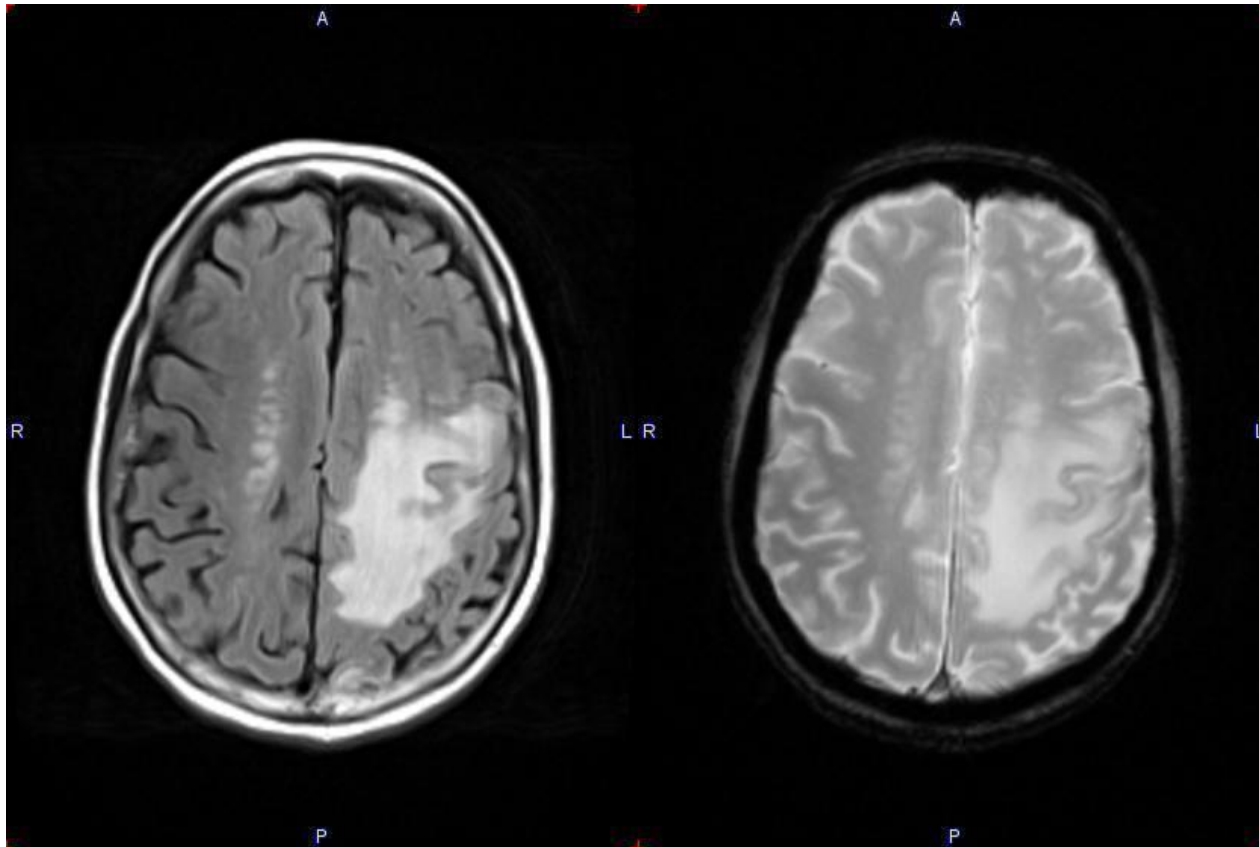

907

908 **Figure 1 (Case 1).** Upper: FLAIR (left) and T2\*-weighted (right) sequences at baseline. Lower: Representative image shows ARIA-  
909 E in the left frontal, parietal, and occipital regions on a FLAIR sequence; BGTS of 11 (left). No concurrent new ARIA-H on a T2\*-  
910 weighted sequence (right). The participant experienced right-sided weakness, dysarthria, and dizziness. The ARIA-E was ongoing  
911 per the last available MRI.

912 Abbreviations: ARIA-E, amyloid-related imaging abnormalities – edema; ARIA-H, amyloid-related imaging abnormalities –  
913 hemosiderosis; BGTS, Barkhof Grand Total Scale; FLAIR, fluid-attenuated inversion recovery; MRI, magnetic resonance imaging.

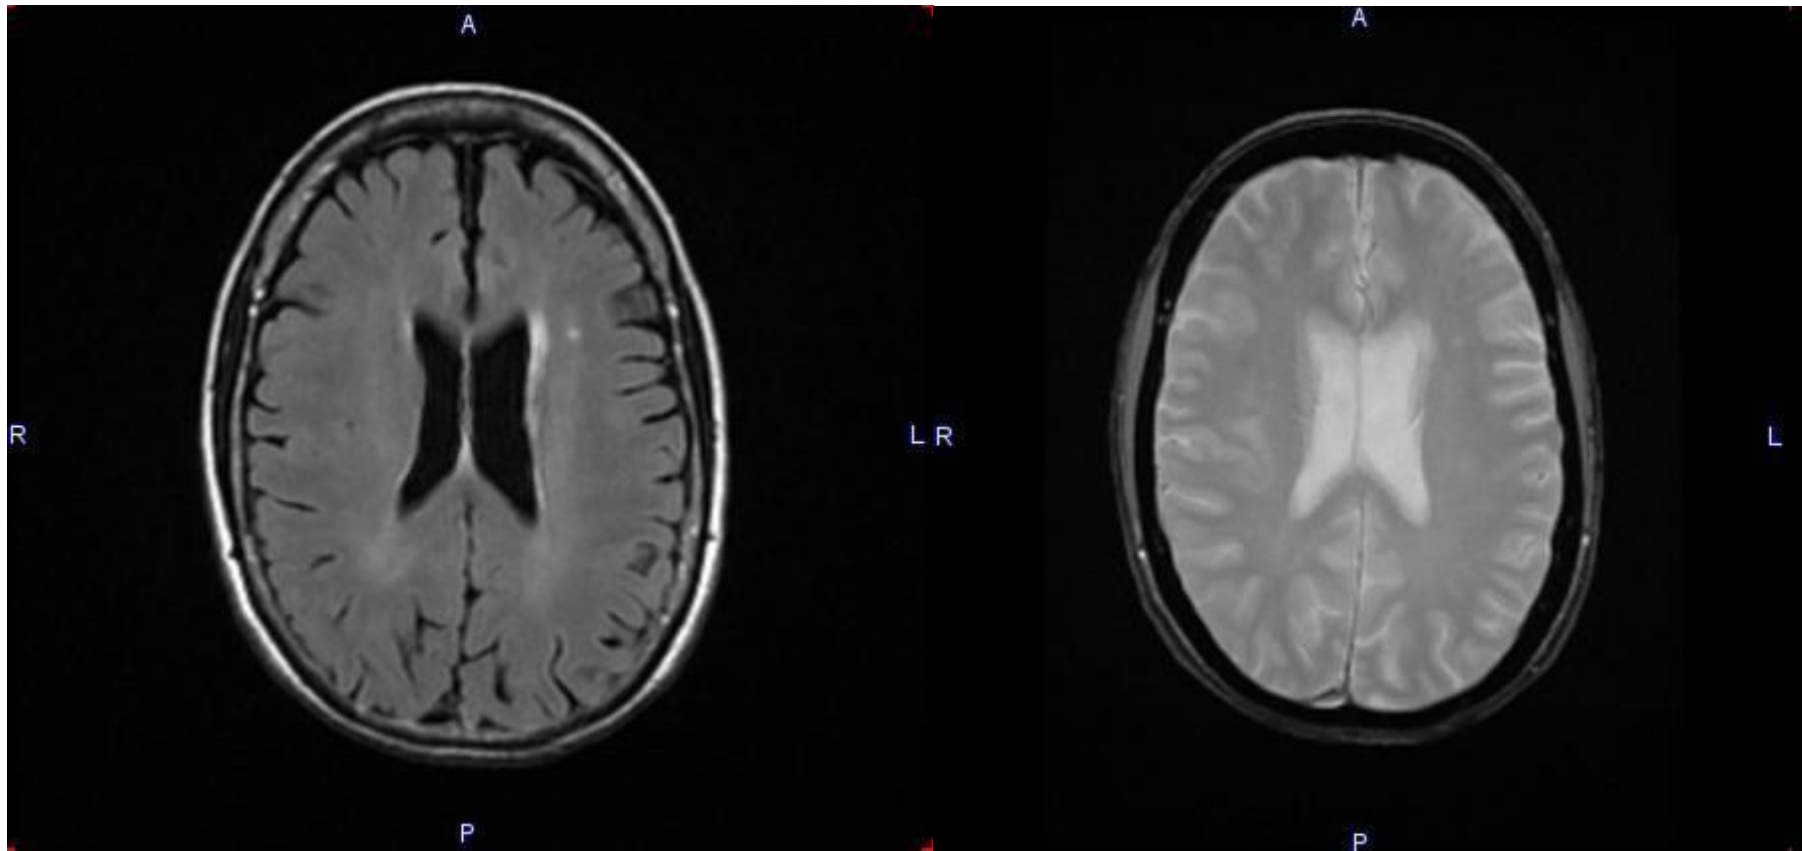

914

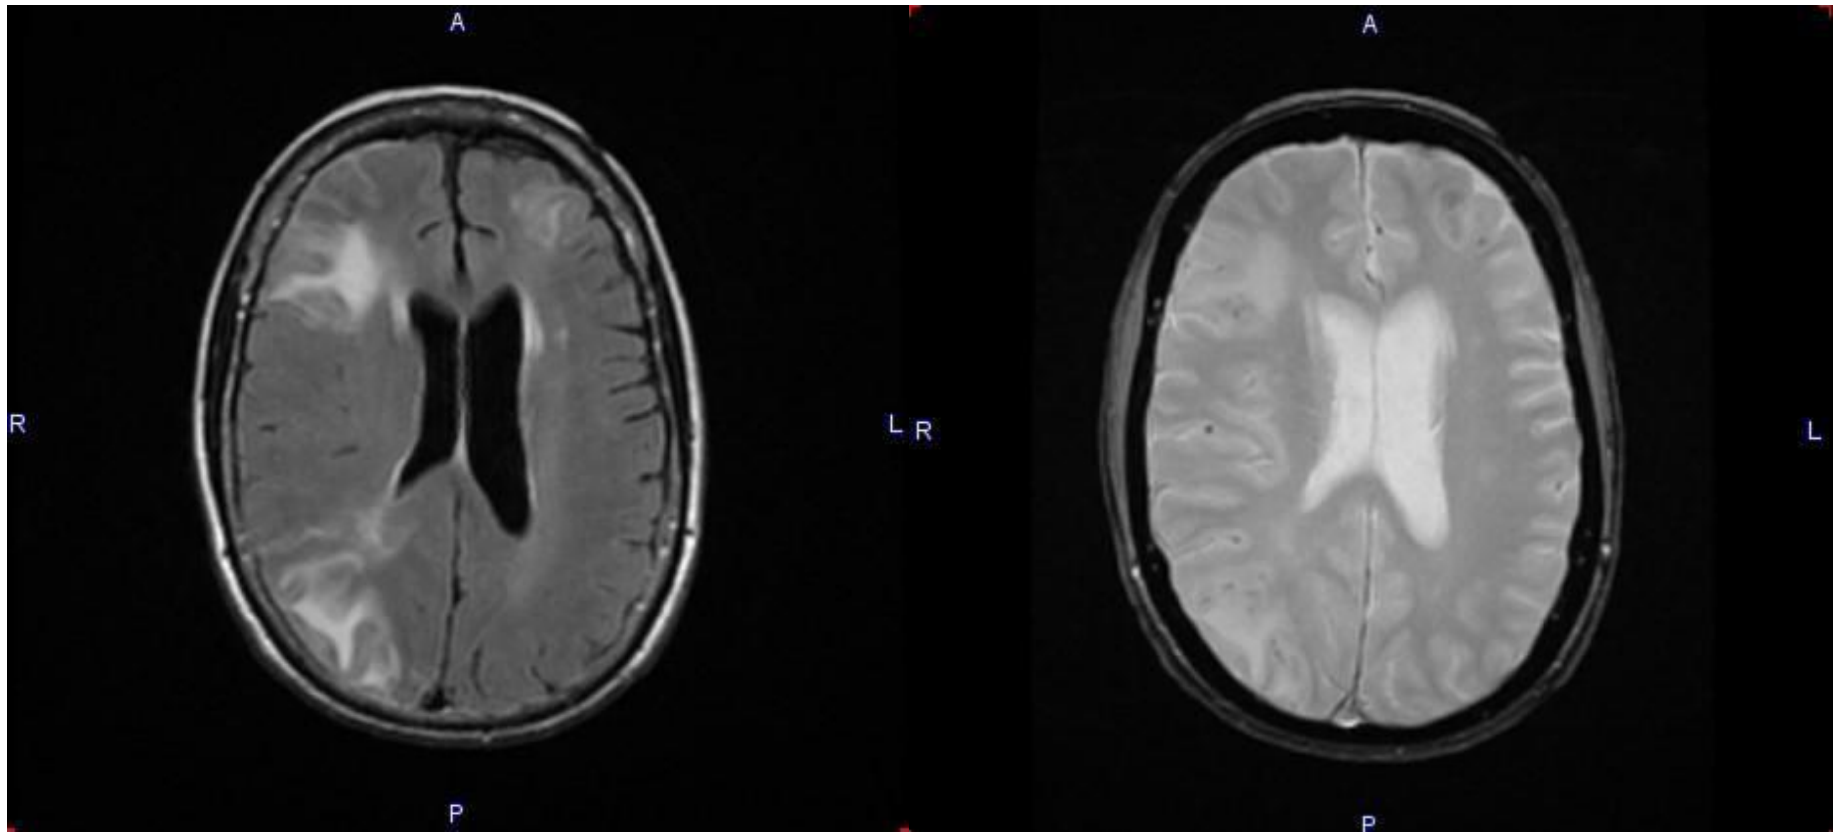

915

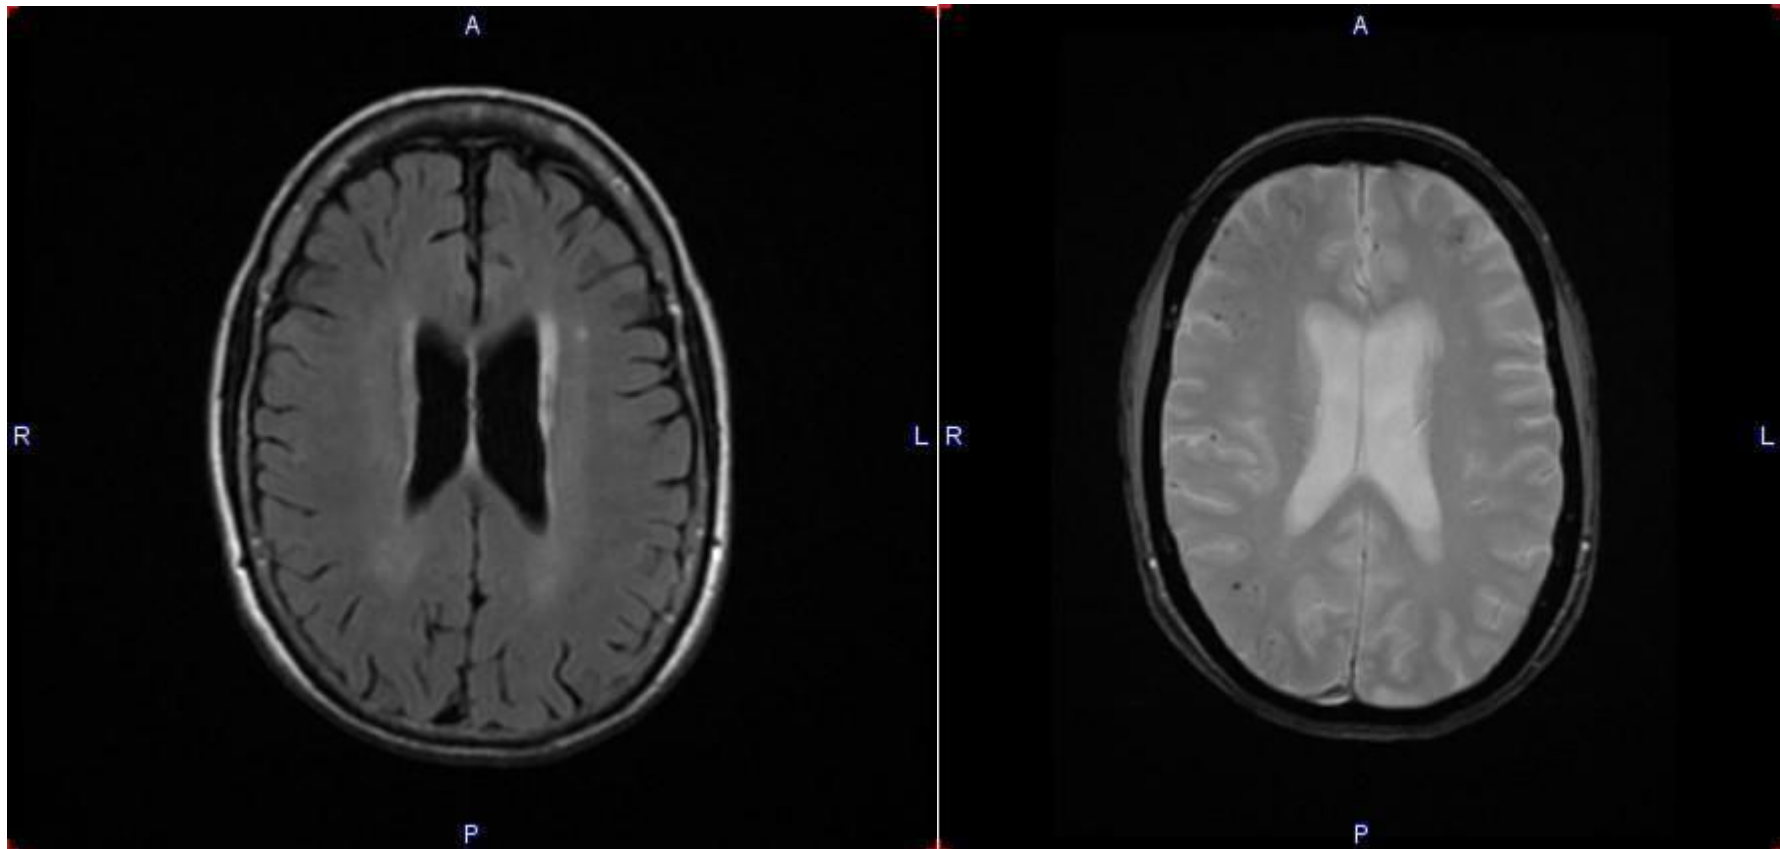

916

917 **Figure 2 (Case 10).** Upper: FLAIR (left) and T2\*-weighted (right) sequences at baseline. Middle: Representative image shows  
918 frontal ARIA-E bilaterally, and in the right parieto-occipital regions on a FLAIR sequence, BGTS of 31 (left); concurrent new ARIA-H  
919 including four new microhemorrhages in the right fronto-parietal regions and six new areas of SS were detected in the bilateral  
920 frontal regions on a T2\*-weighted sequence (representative image, right). The participant experienced mild headache for 1 day,

921 reported approximately 7 weeks after the ARIA-E detection. **Lower:** FLAIR (left) and T2\*-weighted (right) MRI sequences at the  
922 time point of ARIA-E resolution.

923 Abbreviations: ARIA-E, amyloid-related imaging abnormalities – edema; ARIA-H, amyloid-related imaging abnormalities –  
924 hemosiderosis; BGTS, Barkhof Grand Total Scale; FLAIR, fluid-attenuated inversion recovery; MRI, magnetic resonance imaging.

925

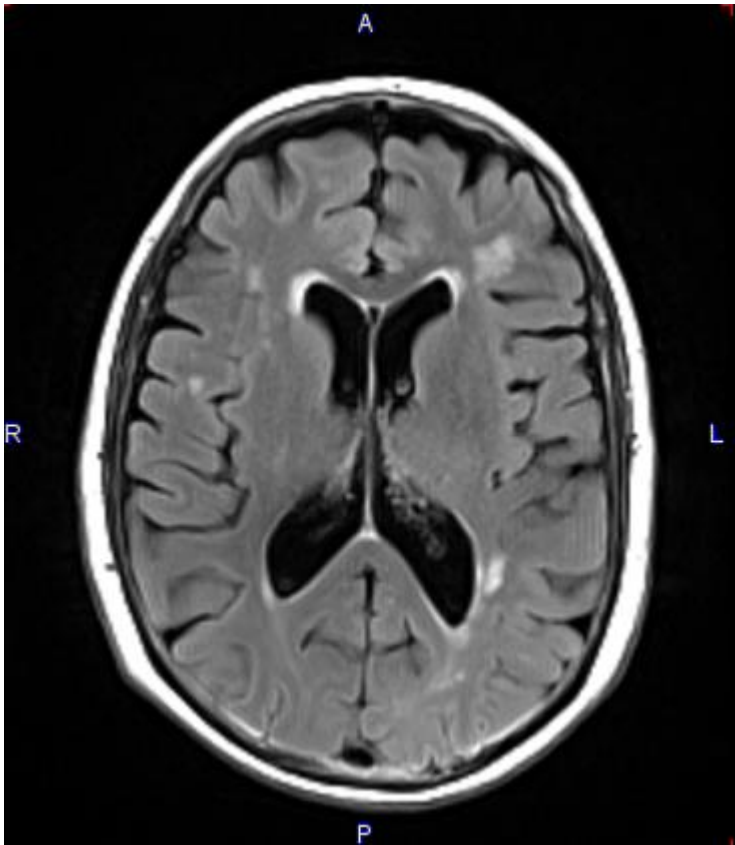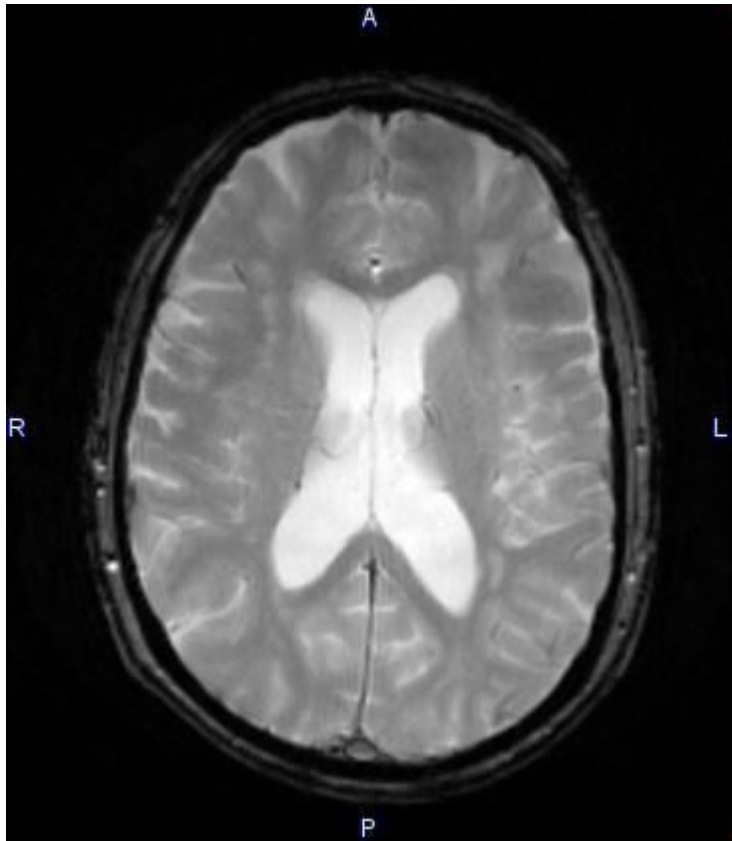

926

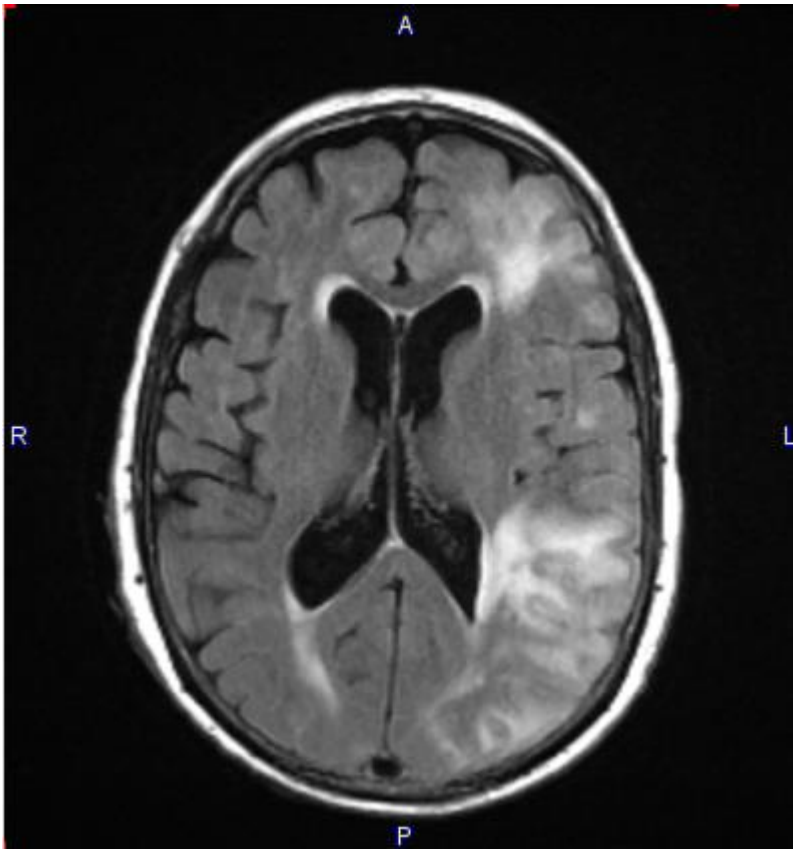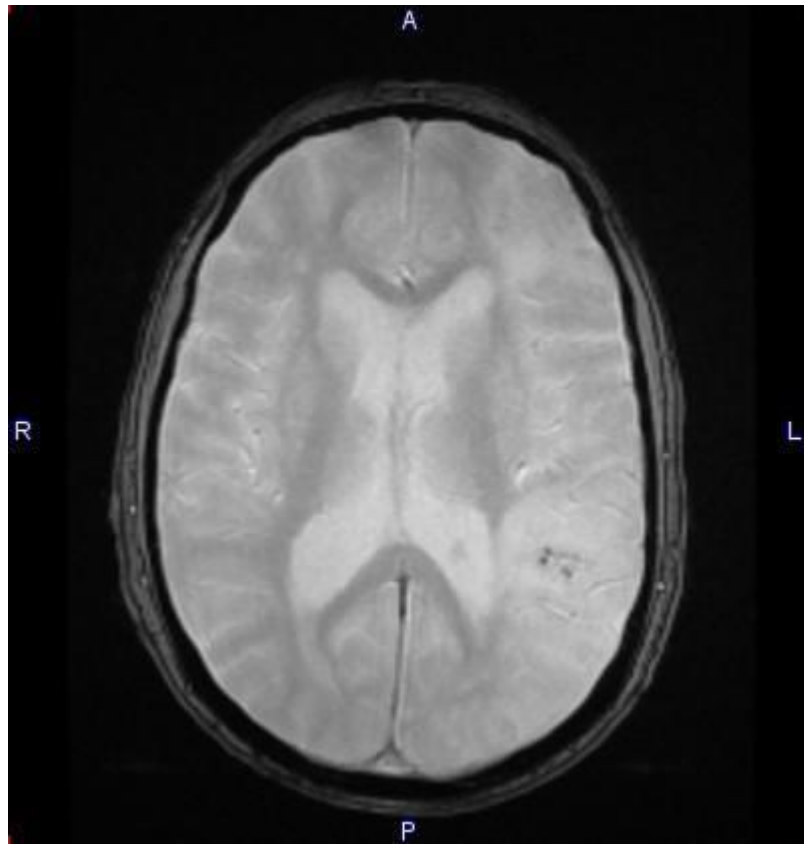

927



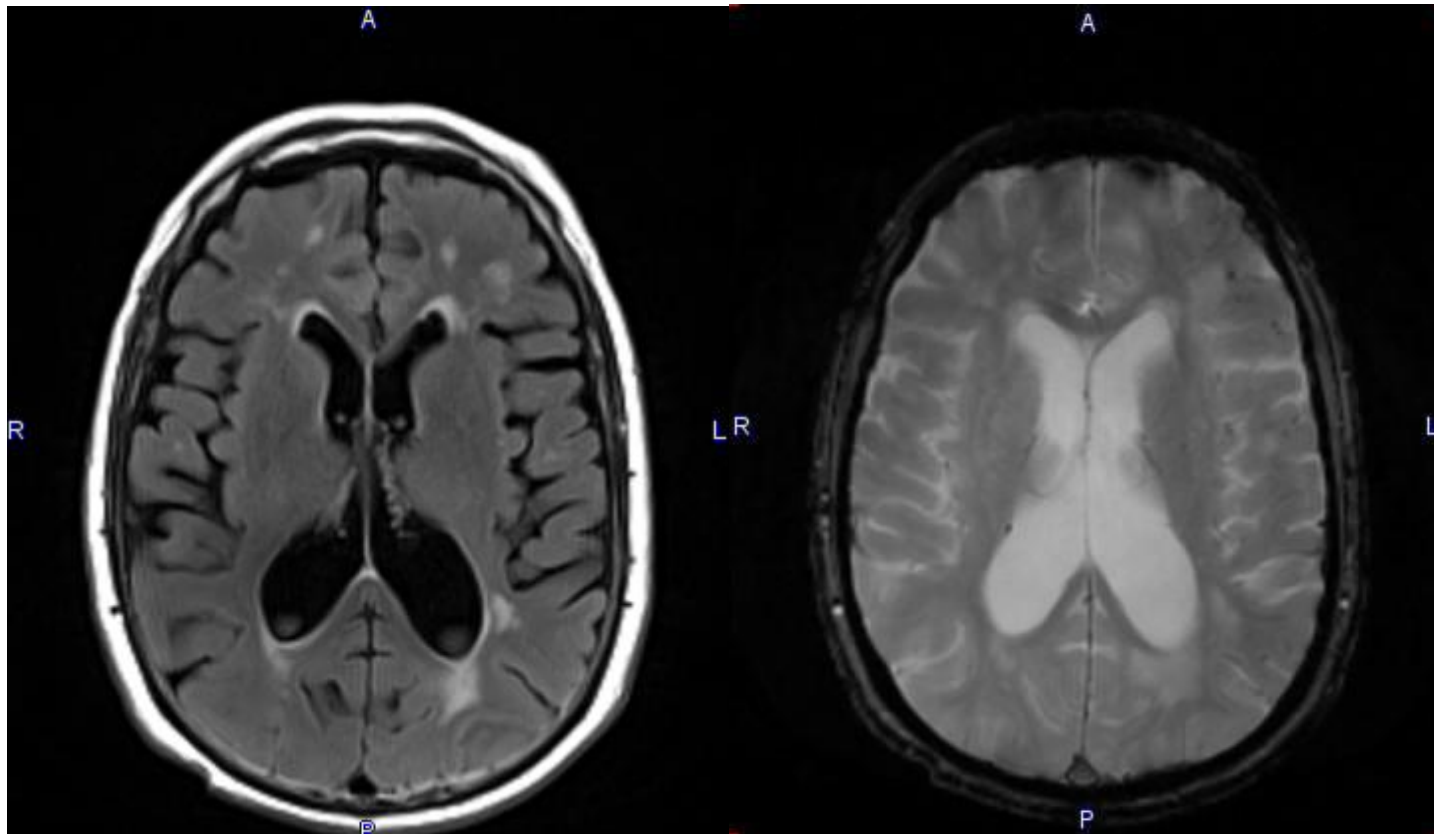

928

929 **Figure 3 (Case 11).** Upper: FLAIR (left) and T2\*-weighted (right) sequences at baseline. Middle: Representative image shows  
930 ARIA-E in the bilateral parietal and occipital regions and left temporal and frontal regions on a FLAIR sequence, BGTS of 26 (left);  
931 concurrent new ARIA-H (15 new microhemorrhages in the left parietal, occipital, and temporal regions; cumulative ARIA-H of 26)  
932 were detected on a T2\*-weighted sequence (representative image, right). The participant experienced headache, status

933 epilepticus, aphasia, memory impairment, and gait disturbance. **Lower:** FLAIR (left) and T2\*-weighted (right) MRI sequences at the  
934 time point of ARIA-E resolution.

935 Abbreviations: ARIA-E, amyloid-related imaging abnormalities – edema; ARIA-H, amyloid-related imaging abnormalities –  
936 hemosiderosis; BGTS, Barkhof Grand Total Scale; FLAIR, fluid-attenuated inversion recovery; MRI, magnetic resonance imaging.

937

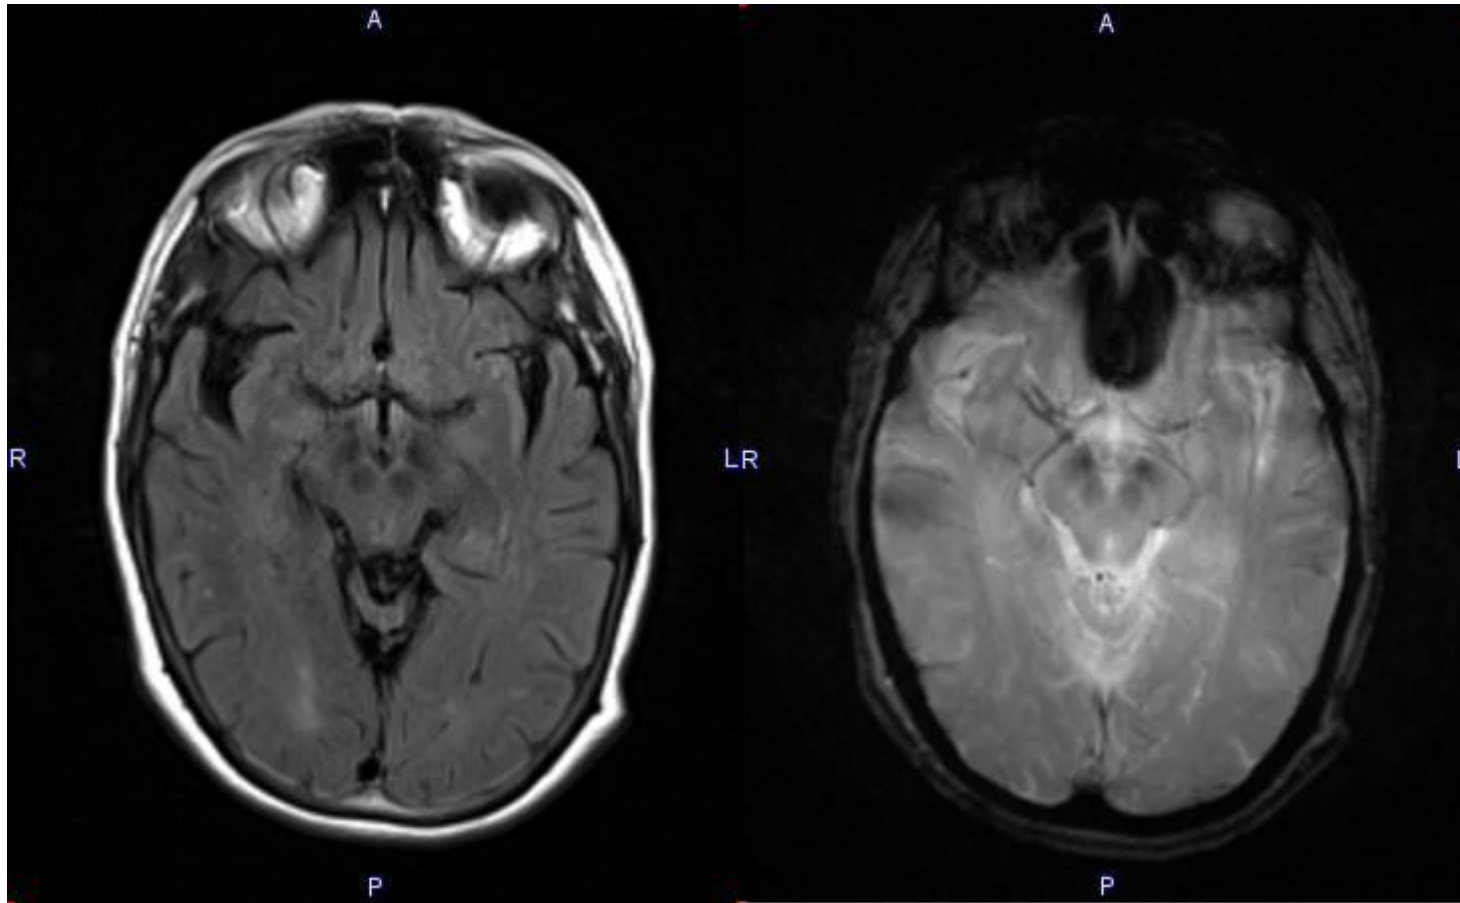

938

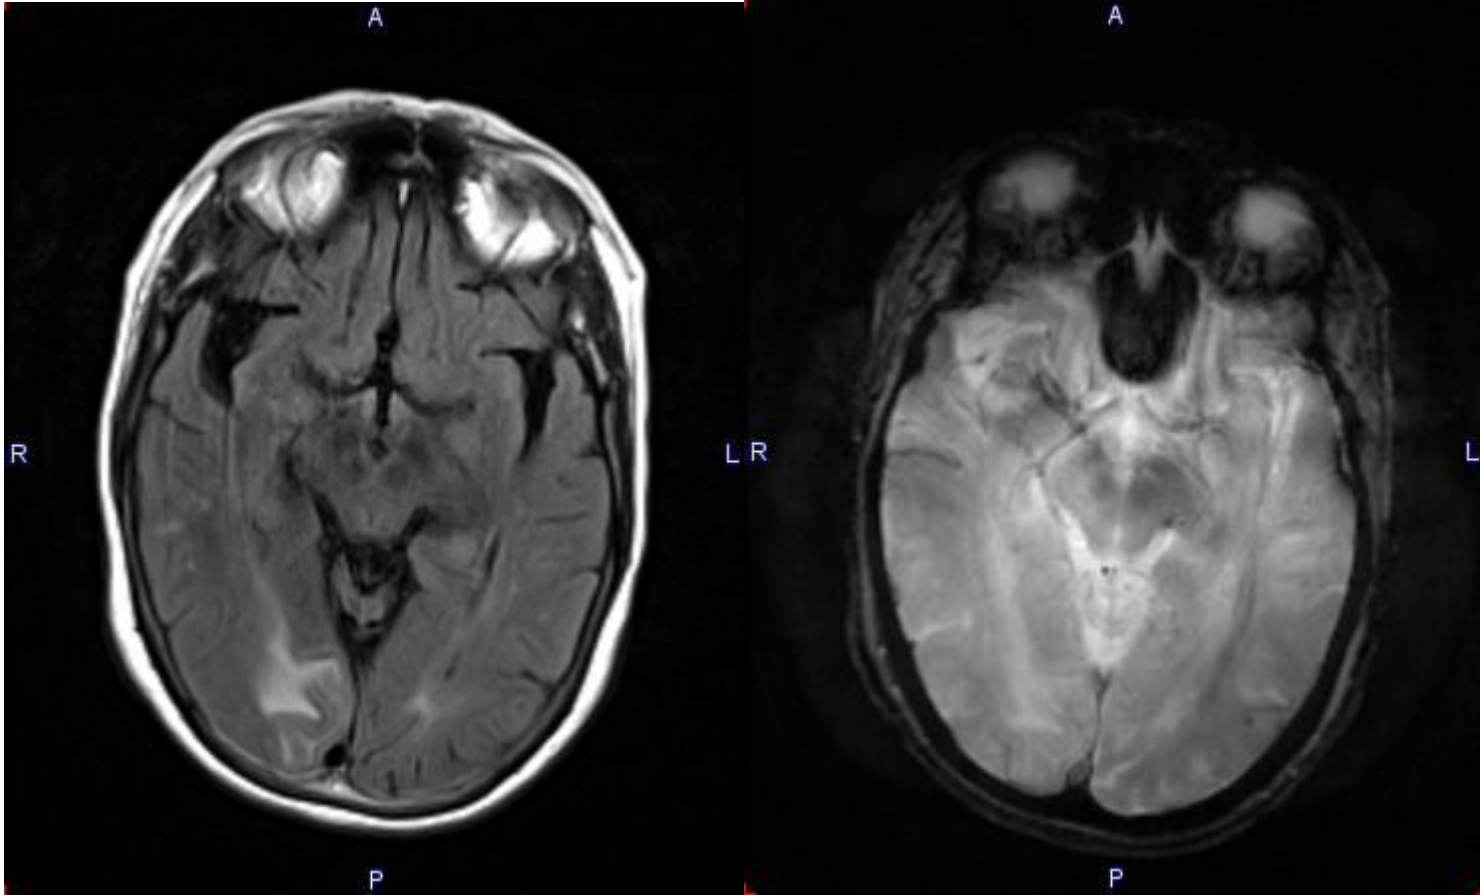

939

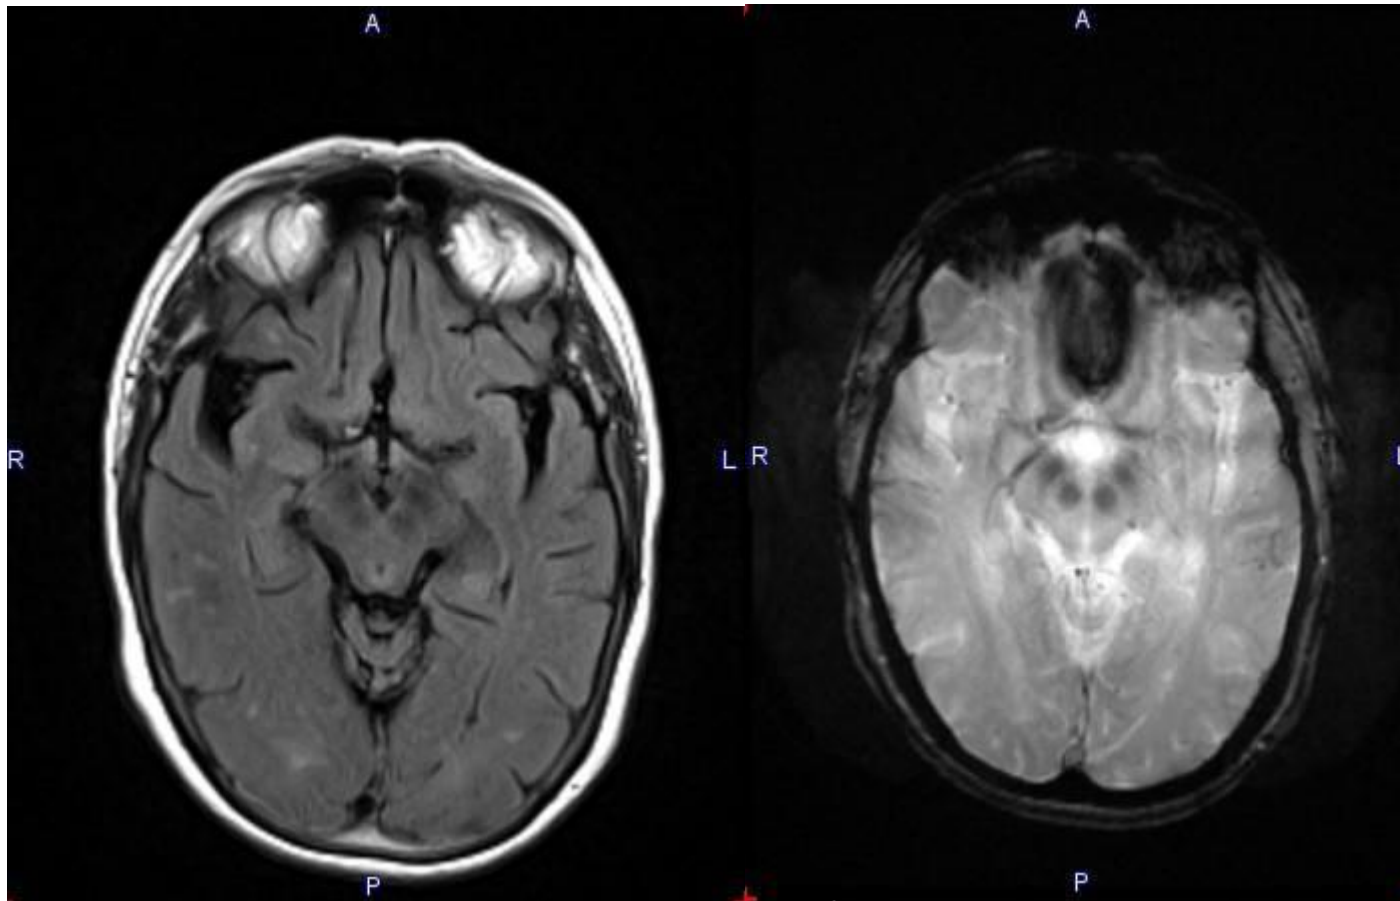

940

941 **Figure 4 (Case 4).** **Upper:** FLAIR (left) and T2\*-weighted (right) sequences at baseline. **Middle:** Representative image shows  
942 ARIA-E in the right occipital region on a FLAIR sequence; BGTS of 3 (left). No concurrent new ARIA-H on a T2\*-weighted  
943 sequence (right). The participant experienced vestibular dysfunction considered to be related by the PI to blinded study drug and

944 ear lavage for excessive cerumen. **Lower:** FLAIR (left) and T2\*-weighted (right) MRI sequences at the time point of ARIA-E

945 resolution.

946 Abbreviations: ARIA-E, amyloid-related imaging abnormalities – edema; ARIA-H, amyloid-related imaging abnormalities –

947 hemosiderosis; BGTS, Barkhof Grand Total Scale; FLAIR, fluid-attenuated inversion recovery; MRI, magnetic resonance imaging;

948 PI, principal investigator.

949 **References**

950 1. ClinicalTrials.gov. A Study to Evaluate the Safety, Tolerability, and Efficacy of  
951 Long-Term Gantenerumab Administration in Participants With Alzheimer's  
952 Disease (AD) <https://clinicaltrials.gov/study/NCT04374253> Accessed April 11,  
953 2024.

954 2. Akaike H. A new look at the statistical model identification. *IEEE Trans Automat*  
955 *Contr.* 1974;19(6):716–723. doi:10.1109/TAC.1974.1100705

956
